# Supplementary material for: Increasing the precision of orthology-based complex prediction through network alignment
Source: PeerJ. 2014 May 29;2:e413. doi: 10.7717/peerj.413 (PMC4045337; doi:10.7717/peerj.413)
Supplement: Table S1 — This table contains four sheets with the following contents: HC yeast predictions - Prediction of yeast complexes by aligning human complexes to the yeast interactome (high-confidence predictions). All yeast predictions —Prediction of yeast complexes by aligning human complexes to the yeast interactome (all predictions). HC human predictions - Prediction of human complexes by aligning yeast complexes to the human interactome (high-confidence predictions). All human predictions—Prediction of human complexes by aligning yeast complexes to the human interactome (all predictions). # QCC/# TCC: number of query/target complex components; only significant GO terms are shown; those GO terms that also belong to the set of most abundant significant GO terms of the given query complex are highlighted in capitals; complexes are sorted by homogeneity, followed by the fraction and number of new components compared to all known complexes in the target species; new components are shown in lower case. [file peerj-02-413-s001.xls]

## Sheet: HC yeast predictions
Prediction of yeast complexes by aligning human complexes to the yeast interactome (high-confidence predictions). #QCC/#TCC: number of query/target complex components; only significant GO terms are shown; those GO terms that also belong to the set of most abundant significant GO terms of the given query complex are highlighted in capitals; complexes are sorted by homogeneity, followed by the frac…
Query complex ID	Query complex name	Query complex components	#QCC	Target complex components	#TCC	New	Biological process homogeneity	Cellular component homogeneity	Molecular function homogeneity
1072	SNX complex (SNX2), oligomeric	SNX2 (O60749)	1	VPS5 (Q92331), snx4 (P47057)	2	1	1.0 [('cell communication', '1.68e-05')]	1.0 [('cytosol', '3.20e-03')]	1.0 [('phosphatidylinositol 3-phosphate binding', '5.45e-05')]
27	Arp2/3 protein complex	ARC1B (O15143), ARP2 (P61160), ARP3 (P61158), ARPC2 (O15144), ARPC3 (O15145), ARPC4 (P59998), ARPC5 (O15511)	7	ARP2 (P32381), ARP3 (P47117), ARPC1 (P38328), ARPC2 (P53731), ARPC3 (Q05933), ARPC4 (P33204)	6	0	1.0 [('mitochondrion inheritance', '7.38e-14')]	1.0 [('ARP2/3 PROTEIN COMPLEX', '6.60e-16')]	1.0 [('ACTIN BINDING', '3.77e-14')]
3010	TFIID subcomplex	TAF12 (Q16514), TAF4 (O00268), TAF5 (Q15542), TAF6 (P49848), TAF9 (Q16594)	5	TAF12 (Q03761), TAF5 (P38129), TAF6 (P53040), TAF9 (Q05027)	4	0	1.0 [('TRANSCRIPTION INITIATION FROM RNA POLYMERASE II PROMOTER', '3.06e-08'), ('histone acetylation', '2.26e-08'), ('regulation of transcription during G1 phase of mitotic cell cycle', '5.90e-10')]	1.0 [('SAGA complex', '1.20e-09'), ('SLIK (SAGA-like) complex', '5.90e-10'), ('TRANSCRIPTION FACTOR TFIID COMPLEX', '3.38e-10')]	1.0 [('GENERAL RNA POLYMERASE II TRANSCRIPTION FACTOR ACTIVITY', '2.04e-08'), ('identical protein binding', '5.10e-04')]
1347	NPC subcomplex (NUP98, NUP107, NUP133, NUP160)	NU107 (P57740), NU133 (Q8WUM0), NU160 (Q12769), NUP98 (P52948)	4	NU100 (Q02629), NU116 (Q02630), NU145 (P49687), NUP42 (P49686), NUP49 (Q02199), NUP57 (P48837), NUP84 (P52891)	7	0	1.0 [('INTRACELLULAR PROTEIN TRANSMEMBRANE TRANSPORT', '5.76e-14'), ('NLS-bearing substrate import into nucleus', '2.86e-15'), ('mRNA export from nucleus', '1.17e-13'), ('mRNA-binding (hnRNP) protein import into nucleus', '2.86e-15'), ('nuclear pore organization', '2.86e-15'), ('protein export from nucleus', '2.86e-15'), ('rRNA export from nucleus', '1.30e-14'), ('ribosomal protein import into nu…	1.0 [('nuclear pore', '1.17e-13')]	1.0 [('structural molecule activity', '1.17e-13')]
338	40S ribosomal subunit, cytoplasmic	RS10 (P46783), RS11 (P62280), RS12 (P25398), RS13 (P62277), RS14 (P62263), RS15 (P62841), RS15A (P62244), RS16 (P62249), RS17 (P08708), RS18 (P62269), RS19 (P39019), RS2 (P15880), RS20 (P60866), RS21 (P63220), RS23 (P62266), RS24 (P62847), RS25 (P62851), RS26 (P62854), RS27A (P62979), RS28 (P62857), RS29 (P62273), RS3 (P23396), RS30 (P62861), RS3A (P61247), RS4X (P62701), RS5 (P46782), RS6 (P6275…	31	RS0A (P32905), RS0B (P46654), RS11 (P26781), RS13 (P05756), RS17B (P14127), RS19A (P07280), RS19B (P07281), RS21A (P0C0V8), RS21B (Q3E754), RS3B (P23248), RS8 (P05754), RS9A (O13516), RS9B (P05755)	13	0	1.0 [('translation', '6.60e-16')]	1.0 [('CYTOSOLIC SMALL RIBOSOMAL SUBUNIT', '6.60e-16')]	1.0 [('STRUCTURAL CONSTITUENT OF RIBOSOME', '6.60e-16')]
1221	TFIIA-TRF2 complex	T2AG (P52657), TERF2 (Q15554), TF2AA (P52655)	3	TOA1 (P32773), TOA2 (P32774)	2	0	1.0 [('TRANSCRIPTION INITIATION FROM RNA POLYMERASE II PROMOTER', '3.24e-04'), ('regulation of transcription', '5.04e-03')]	1.0 [('TRANSCRIPTION FACTOR TFIIA COMPLEX', '3.59e-07')]	1.0 [('GENERAL RNA POLYMERASE II TRANSCRIPTION FACTOR ACTIVITY', '2.66e-04')]
514	TFIID-beta complex	TAF1 (P21675), TAF10 (Q12962), TAF11 (Q15544), TAF12 (Q16514), TAF13 (Q15543), TAF4 (O00268), TAF5 (Q15542), TAF6 (P49848), TAF7 (Q15545), TAF9 (Q16594), TAF9B (Q9HBM6), TBP (P20226)	12	TAF1 (P46677), TAF10 (Q12030), TAF11 (Q04226), TAF12 (Q03761), TAF5 (P38129), TAF6 (P53040), TAF7 (Q05021), TAF9 (Q05027), TBP (P13393)	9	0	1.0 [('TRANSCRIPTION INITIATION FROM RNA POLYMERASE II PROMOTER', '6.60e-16')]	1.0 [('TRANSCRIPTION FACTOR TFIID COMPLEX', '6.60e-16')]	1.0 [('GENERAL RNA POLYMERASE II TRANSCRIPTION FACTOR ACTIVITY', '6.60e-16')]
5361	Cell division cycle complex (CDC27, CDC16, ANAPC7)	APC7 (Q9UJX3), CDC16 (Q13042), CDC27 (P30260)	3	CDC16 (P09798), CDC23 (P16522), CDC27 (P38042)	3	0	1.0 [('ANAPHASE-PROMOTING COMPLEX-DEPENDENT PROTEASOMAL UBIQUITIN-DEPENDENT PROTEIN CATABOLIC PROCESS', '1.17e-07'), ('cell division', '2.89e-04'), ('cyclin catabolic process', '8.98e-08'), ('mitotic metaphase/anaphase transition', '1.17e-07'), ('mitotic sister chromatid segregation', '1.84e-06'), ('mitotic spindle elongation', '7.23e-07'), ('protein ubiquitination', '3.45e-06')]	1.0 [('anaphase-promoting complex', '2.29e-07')]	1.0 [('ubiquitin-protein ligase activity', '6.20e-06')]
1174	PHAX-CBC complex (cap binding complex)	NCBP1 (Q09161), NCBP2 (P52298), PHAX (Q9H814)	3	NCBP1 (P34160), NCBP2 (Q08920)	2	0	1.0 [('mRNA transport', '6.84e-05'), ('nuclear mRNA splicing, via spliceosome', '9.51e-04'), ('nuclear-transcribed mRNA catabolic process, nonsense-mediated decay', '5.28e-05')]	1.0 [('commitment complex', '2.76e-05'), ('nuclear cap binding complex', '5.03e-07'), ('perinuclear region of cytoplasm', '4.57e-05')]	1.0 []
2716	Elongator core complex	ELP1 (O95163), ELP2 (Q6IA86), ELP3 (Q9H9T3)	3	ELP1 (Q06706), ELP2 (P42935), ELP3 (Q02908)	3	0	1.0 [('REGULATION OF TRANSCRIPTION FROM RNA POLYMERASE II PROMOTER', '1.95e-05'), ('TRANSCRIPTION', '2.16e-03'), ('protein transport', '2.63e-04'), ('tRNA wobble uridine modification', '7.51e-07')]	1.0 [('Elongator holoenzyme complex', '6.53e-09')]	1.0 []
3714	Pericentrin-GCP complex	GCP2 (Q9BSJ2), GCP3 (Q96CW5), PCNT (O95613)	3	SPC97 (P38863), SPC98 (P53540)	2	0	1.0 [('MICROTUBULE NUCLEATION', '1.16e-04')]	1.0 [('gamma-tubulin small complex, spindle pole body', '1.51e-06'), ('inner plaque of spindle pole body', '3.02e-06'), ('microtubule', '2.04e-04'), ('outer plaque of spindle pole body', '5.03e-06')]	1.0 [('structural constituent of cytoskeleton', '4.98e-04')]
1700	ABL2-HRAS-RIN1 complex	ABL2 (P42684), RASH (P01112), RIN1 (Q13671)	3	RAS1 (P01119), RAS2 (P01120)	2	0	1.0 [('Ras protein signal transduction', '4.57e-05'), ('replicative cell aging', '2.82e-04')]	1.0 [('intracellular', '2.49e-04'), ('plasma membrane', '1.49e-02')]	1.0 [('GTP binding', '2.24e-03'), ('GTPase activity', '8.60e-04')]
1318	Transcription initiation factor complex (TAF1, TAF5, TAF11, TAF12, TBP)	TAF1 (P21675), TAF11 (Q15544), TAF12 (Q16514), TAF5 (Q15542), TBP (P20226)	5	TAF1 (P46677), TAF11 (Q04226), TAF12 (Q03761), TAF5 (P38129), TBP (P13393)	5	0	1.0 [('TRANSCRIPTION INITIATION FROM RNA POLYMERASE II PROMOTER', '8.48e-11')]	1.0 [('TRANSCRIPTION FACTOR TFIID COMPLEX', '2.64e-13')]	1.0 [('GENERAL RNA POLYMERASE II TRANSCRIPTION FACTOR ACTIVITY', '5.07e-11')]
2204	MCM8-ORC2-CDC6 complex	CDC6 (Q99741), MCM8 (Q9UJA3), ORC2 (Q13416)	3	CDC6 (P09119), ORC1 (P54784), ORC2 (P32833)	3	0	1.0 [('pre-replicative complex assembly', '9.29e-08')]	1.0 [('DNA replication preinitiation complex', '2.72e-07'), ('pre-replicative complex', '9.29e-08')]	1.0 [('DNA replication origin binding', '6.69e-07'), ('chromatin binding', '2.18e-06')]
2205	ORC5-ORC1 complex	ORC1 (Q13415), ORC5 (O43913)	2	CDC6 (P09119), ORC1 (P54784), ORC5 (P50874)	3	0	1.0 [('pre-replicative complex assembly', '9.29e-08')]	1.0 [('DNA replication preinitiation complex', '2.72e-07'), ('pre-replicative complex', '9.29e-08')]	1.0 [('ATP binding', '7.88e-03'), ('DNA replication origin binding', '6.69e-07')]
1245	Protein phosphatase 4 complex	PP4C (P60510), PP4R2 (Q9NY27)	2	PP2A1 (P23594), PP2A2 (P23595)	2	0	1.0 [('G1/S transition of mitotic cell cycle', '6.48e-04'), ('actin filament organization', '5.85e-04'), ('budding cell bud growth', '1.35e-04'), ('mitotic cell cycle spindle assembly checkpoint', '1.50e-04'), ('protein amino acid dephosphorylation', '3.67e-04'), ('translation', '1.17e-02')]	1.0 [('protein phosphatase type 2A complex', '1.18e-05')]	1.0 [('iron ion binding', '2.69e-03'), ('manganese ion binding', '8.18e-04'), ('protein serine/threonine phosphatase activity', '9.48e-05')]
2792	MCM2-MCM4-MCM6-MCM7 complex	MCM2 (P49736), MCM4 (P33991), MCM6 (Q14566), MCM7 (P33993)	4	CDC47 (P38132), CDC54 (P30665), MCM2 (P29469), MCM3 (P24279), MCM5 (P29496), MCM6 (P53091)	6	0	1.0 [('DNA REPLICATION INITIATION', '9.89e-14'), ('S phase of mitotic cell cycle', '2.20e-15'), ('TRANSCRIPTION', '7.10e-07'), ('pre-replicative complex assembly', '2.20e-15')]	1.0 [('DNA replication preinitiation complex', '1.81e-14'), ('MCM complex', '2.20e-15'), ('cytoplasm', '9.94e-04'), ('pre-replicative complex', '2.20e-15')]	1.0 [('ATP BINDING', '2.45e-05'), ('DNA replication origin binding', '1.26e-13')]
1345	Septin complex	SEP11 (Q9NVA2), SEPT2 (Q15019), SEPT7 (Q16181), SEPT8 (Q92599), SEPT9 (Q9UHD8)	5	CDC11 (P32458), CDC12 (P32468), CDC3 (P32457), SHS1 (Q07657), SPR28 (Q04921)	5	0	1.0 [('CELL CYCLE', '8.84e-09')]	1.0 [('SEPTIN COMPLEX', '2.47e-15')]	1.0 [('GTP BINDING', '6.80e-09'), ('structural constituent of cytoskeleton', '1.43e-10')]
389	ORC complex (origin recognition complex)	ORC1 (Q13415), ORC2 (Q13416), ORC3 (Q9UBD5), ORC4 (O43929), ORC5 (O43913), ORC6 (Q9Y5N6)	6	CDC6 (P09119), ORC1 (P54784), ORC2 (P32833), ORC4 (P54791), ORC5 (P50874)	5	0	1.0 [('pre-replicative complex assembly', '3.53e-13')]	1.0 [('DNA replication preinitiation complex', '2.39e-12'), ('pre-replicative complex', '3.53e-13')]	1.0 [('DNA replication origin binding', '1.15e-11')]
2860	DSIF complex (DRB sensitivity-inducing factor complex)	SPT4H (P63272), SPT5H (O00267)	2	SPT4 (P32914), SPT5 (P27692)	2	0	1.0 [('RNA ELONGATION FROM RNA POLYMERASE II PROMOTER', '7.20e-04'), ('chromatin organization', '1.06e-05'), ('mRNA processing', '4.54e-04')]	1.0 [('DSIF complex', '5.03e-07')]	1.0 [('RNA polymerase I transcription factor activity', '3.32e-05'), ('RNA polymerase II transcription elongation factor activity', '3.92e-05')]
5231	53BP1-containing complex	KU70 (P12956), KU86 (P13010), RFA1 (P27694), RFA2 (P15927), TP53B (Q12888)	5	RFA1 (P22336), RFA2 (P26754)	2	0	1.0 [('DNA unwinding during replication', '6.32e-05'), ('double-strand break repair via homologous recombination', '6.32e-05'), ('establishment of protein localization', '1.15e-05'), ('heteroduplex formation', '3.22e-05'), ('nucleotide-excision repair', '2.41e-04'), ('protein ubiquitination', '8.08e-04'), ('reciprocal meiotic recombination', '6.44e-04'), ('telomere maintenance via recombination',…	1.0 [('DNA replication factor A complex', '3.45e-06'), ('chromosome, telomeric region', '2.91e-04'), ('condensed nuclear chromosome', '1.05e-04')]	1.0 [('double-stranded DNA binding', '1.38e-04'), ('sequence-specific DNA binding', '1.17e-02'), ('single-stranded DNA binding', '1.56e-04')]
559	Decapping complex	DCP1A (Q9NPI6), DCP2 (Q8IU60), DDX6 (P26196), EDC3 (Q96F86), EDC4 (Q6P2E9)	5	DCP2 (P53550), DHH1 (P39517)	2	0	1.0 [('deadenylation-dependent decapping of nuclear-transcribed mRNA', '1.03e-05'), ('mRNA processing', '2.59e-04')]	1.0 [('CYTOPLASMIC MRNA PROCESSING BODY', '6.64e-05')]	1.0 []
3097	TIMM17-TIMM23 complex	TI17A (Q99595), TIM23 (O14925)	2	TIM17 (P39515), TIM23 (P32897)	2	0	1.0 [('protein import into mitochondrial matrix', '4.91e-05')]	1.0 [('MITOCHONDRIAL INNER MEMBRANE PRESEQUENCE TRANSLOCASE COMPLEX', '1.72e-06')]	1.0 [('P-P-BOND-HYDROLYSIS-DRIVEN PROTEIN TRANSMEMBRANE TRANSPORTER ACTIVITY', '1.29e-05')]
2266	PPP3CA-PPP3CA-RCAN1 complex	PP2BA (Q08209), PP2BB (P16298), RCAN1 (P53805)	3	PP2B1 (P23287), PP2B2 (P14747)	2	0	1.0 [('adaptation to pheromone during conjugation with cellular fusion', '3.79e-05'), ('cellular ion homeostasis', '5.23e-05')]	1.0 [('CALCINEURIN COMPLEX', '1.72e-06')]	1.0 [('CALMODULIN BINDING', '3.79e-05'), ('IRON ION BINDING', '1.96e-03'), ('phosphoprotein phosphatase activity', '2.58e-05')]
1034	ORC 2-5 complex (origin recognition 2-5 complex)	ORC2 (Q13416), ORC3 (Q9UBD5), ORC4 (O43929), ORC5 (O43913)	4	ORC2 (P32833), ORC4 (P54791), ORC5 (P50874)	3	0	1.0 [('DNA REPLICATION INITIATION', '8.36e-07'), ('chromatin silencing at silent mating-type cassette', '1.71e-06'), ('pre-replicative complex assembly', '1.30e-07')]	1.0 [('DNA replication preinitiation complex', '3.80e-07'), ('nuclear origin of replication recognition complex', '5.72e-09'), ('pre-replicative complex', '1.30e-07')]	1.0 [('DNA REPLICATION ORIGIN BINDING', '9.37e-07')]
112	Prefoldin complex	PFD1 (O60925), PFD2 (Q9UHV9), PFD3 (P61758), PFD4 (Q9NQP4), PFD5 (Q99471), PFD6 (O15212)	6	PFD2 (P40005), PFD3 (P48363), PFD4 (P53900), PFD5 (Q04493), PFD6 (P52553)	5	0	1.0 [('PROTEIN FOLDING', '1.78e-09'), ('tubulin complex assembly', '1.10e-15')]	1.0 [('PREFOLDIN COMPLEX', '3.08e-15')]	1.0 [('UNFOLDED PROTEIN BINDING', '2.20e-09'), ('tubulin binding', '1.10e-15')]
944	Class C Vps complex (VPS11, VPS18, VPS16)	VPS11 (Q9H270), VPS16 (Q9H269), VPS18 (Q9P253)	3	PEP3 (P27801), PEP5 (P12868), VPS16 (Q03308)	3	0	1.0 [('Golgi to endosome transport', '8.18e-08'), ('late endosome to vacuole transport', '3.26e-07'), ('vacuole fusion, non-autophagic', '6.57e-07')]	1.0 [('CORVET complex', '5.72e-09'), ('HOPS complex', '5.72e-09'), ('fungal-type vacuole membrane', '1.93e-05')]	1.0 []
5209	Ubiquilin-proteasome complex	PSA1 (P25786), PSA2 (P25787), PSA6 (P60900), UBE3A (Q05086), UBQL1 (Q9UMX0), UBQL2 (Q9UHD9)	6	PSA1 (P40302), PSA2 (P23639), PSA3 (P21242), PSA4 (P23638), PSA6 (P21243), PSA7 (P40303)	6	0	1.0 [('ubiquitin-dependent protein catabolic process', '2.61e-11')]	1.0 [('NUCLEUS', '2.30e-04'), ('proteasome core complex, alpha-subunit complex', '1.10e-15'), ('proteasome storage granule', '9.06e-15')]	1.0 [('threonine-type endopeptidase activity', '1.10e-15')]
2307	AP3D1-AP3S2 complex	AP3D1 (O14617), AP3S2 (P59780)	2	AP3D (Q08951), AP3S (P47064)	2	0	1.0 [('Golgi to vacuole transport', '1.51e-04'), ('INTRACELLULAR PROTEIN TRANSPORT', '8.90e-04')]	1.0 [('GOLGI APPARATUS', '1.88e-03'), ('MEMBRANE COAT', '7.54e-06'), ('cytoplasmic vesicle', '7.69e-05')]	1.0 [('PROTEIN TRANSPORTER ACTIVITY', '1.63e-04')]
4498	p32-CBF-DNA complex	C1QBP (Q07021), NFYA (P23511), NFYB (P25208), NFYC (Q13952)	4	HAP2 (P06774), HAP3 (P13434), HAP5 (Q02516)	3	0	1.0 [('regulation of carbohydrate metabolic process', '7.14e-09'), ('transcription', '1.35e-03')]	1.0 [('CCAAT-BINDING FACTOR COMPLEX', '8.17e-10')]	1.0 [('transcription activator activity', '2.90e-06')]
274	RAD17-RFC-9-1-1 checkpoint supercomplex	HUS1 (O60921), RAD1 (O60671), RAD17 (O75943), RAD9A (Q99638), RFC2 (P35250), RFC3 (P40938), RFC4 (P35249), RFC5 (P40937)	8	RFC1 (P38630), RFC2 (P40348), RFC3 (P38629), RFC4 (P40339), RFC5 (P38251), rad24 (P32641)	6	1	0.83 [('leading strand elongation', '1.76e-12'), ('mismatch repair', '1.02e-11')]	1.0 [('nucleus', '2.30e-04')]	1.0 [('ATP binding', '1.22e-05')]
2757	SMN complex, U7 snRNA specific	LSM10 (Q969L4), LSM11 (P83369), RSMB (P14678), RUXE (P62304), RUXF (P62306), RUXG (P62308), SMD3 (P62318)	7	RSMB (P40018), RUXE (Q12330), RUXF (P54999), RUXG (P40204), SMD3 (P43321)	5	0	1.0 [('nuclear mRNA splicing, via spliceosome', '9.50e-10')]	1.0 [('U1 snRNP', '9.08e-13'), ('U4/U6 x U5 tri-snRNP complex', '1.44e-11'), ('U5 snRNP', '4.41e-13')]	0.8 [('RNA BINDING', '1.36e-04')]
1037	TFIIH transcription factor core complex	ERCC3 (P19447), TF2H1 (P32780), TF2H2 (Q13888), TF2H3 (Q13889), TF2H4 (Q92759)	5	RAD25 (Q00578), SSL1 (Q04673), TFB1 (P32776), TFB2 (Q02939), TFB4 (Q12004)	5	0	1.0 [('TRANSCRIPTION INITIATION FROM RNA POLYMERASE II PROMOTER', '1.13e-10')]	1.0 [('SSL2-core TFIIH complex portion of NEF3 complex', '8.80e-16'), ('SSL2-core TFIIH complex portion of holo TFIIH complex', '8.80e-16')]	0.8 [('general RNA polymerase II transcription factor activity', '5.07e-08')]
553	RHOA-IP3R-TRPC1 complex	ITPR1 (Q14643), RHOA (P61586), TRPC1 (P48995)	3	RHO1 (P06780), rho2 (P06781), rho3 (Q00245), rho4 (Q00246)	4	3	1.0 [('actin filament organization', '2.04e-08'), ('establishment of cell polarity', '1.46e-08'), ('small GTPase mediated signal transduction', '3.36e-08')]	0.75 [('intracellular', '6.45e-06'), ('plasma membrane', '3.02e-03')]	1.0 [('GTP binding', '7.89e-07'), ('GTPase activity', '1.13e-07'), ('signal transducer activity', '3.13e-09')]
1171	c-MYC-ATPase-helicase complex	ACL6A (O96019), MYC (P01106), RUVB1 (Q9Y265), RUVB2 (Q9Y230), TRRAP (Q9Y4A5)	5	ARP4 (P80428), RUVB1 (Q03940), RUVB2 (Q12464), TRA1 (P38811)	4	0	1.0 [('DNA repair', '4.39e-07'), ('TRANSCRIPTION', '1.21e-04'), ('regulation of transcription from RNA polymerase II promoter', '2.23e-07')]	0.75 [('ASTRA complex', '4.00e-08'), ('Ino80 complex', '2.51e-07'), ('Swr1 complex', '3.26e-07')]	1.0 []
1142	SMN complex	DDX20 (Q9UHI6), GEMI2 (O14893), RSMB (P14678), RUXE (P62304), RUXF (P62306), RUXG (P62308), SMD1 (P62314), SMD2 (P62316), SMD3 (P62318), SMN (Q16637)	10	RSMB (P40018), RUXE (Q12330), RUXF (P54999), RUXG (P40204), SMD1 (Q02260), SMD2 (Q06217), SMD3 (P43321)	7	0	1.0 [('nuclear mRNA splicing, via spliceosome', '1.09e-13')]	1.0 [('U1 snRNP', '1.10e-15'), ('U4/U6 x U5 tri-snRNP complex', '1.10e-15'), ('U5 snRNP', '1.10e-15')]	0.71 [('RNA binding', '2.65e-05')]
5342	ELMO1-DOCK1-RAC1 complex	DOCK1 (Q14185), ELMO1 (Q92556), RAC1 (P63000)	3	RHO5 (P53879), cdc42 (P19073), rho1 (P06780), rho2 (P06781), rho3 (Q00245), rho4 (Q00246)	6	5	0.83 [('SMALL GTPASE MEDIATED SIGNAL TRANSDUCTION', '9.50e-10'), ('establishment of cell polarity', '3.30e-10')]	0.83 [('plasma membrane', '5.86e-06')]	1.0 [('GTP binding', '1.45e-10'), ('GTPase activity', '7.52e-12')]
4403	EIF3 complex (EIF3A, EIF3B, EIF3G, EIF3I, EIF3J)	EIF3A (Q14152), EIF3B (P55884), EIF3G (O75821), EIF3I (Q13347), EIF3J (O75822)	5	EIF3A (P38249), EIF3B (P06103), EIF3G (Q04067), EIF3I (P40217), EIF3J (Q05775), eif2a (P53235)	6	1	0.83 [('TRANSLATIONAL INITIATION', '1.25e-10')]	0.83 [('EUKARYOTIC TRANSLATION INITIATION FACTOR 3 COMPLEX', '1.11e-14')]	1.0 [('TRANSLATION INITIATION FACTOR ACTIVITY', '1.95e-13')]
655	HSF1-HSF2 complex	HSF1 (Q00613), HSF2 (Q03933)	2	SFL1 (P20134), hsf (P10961), skn7 (P38889)	3	2	1.0 [('transcription', '1.08e-03')]	0.67 []	1.0 [('TRANSCRIPTION FACTOR ACTIVITY', '5.06e-05'), ('sequence-specific DNA binding', '7.79e-05')]
5241	SMC1-SMC3 complex	SMC1A (Q14683), SMC3 (Q9UQE7)	2	SMC1 (P32908), SMC3 (P47037), smc4 (Q12267)	3	1	1.0 [('CELL DIVISION', '1.16e-04')]	0.67 [('nuclear mitotic cohesin complex', '5.17e-06')]	1.0 [('ATP binding', '6.30e-03')]
605	TIM (TIMM17ab, TIMM23, TIMM44) complex, mitochondrial	TI17A (Q99595), TI17B (O60830), TIM23 (O14925), TIM44 (O43615)	4	TIM17 (P39515), TIM23 (P32897), tim44 (Q01852)	3	1	1.0 [('protein import into mitochondrial matrix', '1.58e-07')]	0.67 [('MITOCHONDRIAL INNER MEMBRANE PRESEQUENCE TRANSLOCASE COMPLEX', '5.17e-06')]	1.0 [('P-P-BOND-HYDROLYSIS-DRIVEN PROTEIN TRANSMEMBRANE TRANSPORTER ACTIVITY', '1.96e-08')]
1083	P-TEFb.4 complex	CCNK (O75909), CDK9 (P50750)	2	CTK1 (Q03957), CTK2 (P46962), ssn8 (P47821)	3	1	1.0 [('transcription', '1.35e-03')]	0.67 [('carboxy-terminal domain protein kinase complex', '3.23e-06'), ('nucleolus', '1.71e-02'), ('nucleoplasm', '4.99e-04')]	1.0 []
5251	Ku-ORC complex	KU70 (P12956), KU86 (P13010), ORC2 (Q13416), ORC3 (Q9UBD5), ORC4 (O43929), ORC6 (Q9Y5N6)	6	ORC2 (P32833), ORC4 (P54791), ku70 (P32807)	3	1	1.0 [('chromatin silencing at silent mating-type cassette', '1.22e-06')]	0.67 [('DNA replication preinitiation complex', '2.26e-04'), ('nuclear origin of replication recognition complex', '1.61e-05'), ('pre-replicative complex', '1.13e-04')]	1.0 []
1734	SF3A1-SF3A2-SF3A3 complex	SF3A1 (Q15459), SF3A2 (Q15428), SF3A3 (Q12874)	3	PRP11 (Q07350), PRP21 (P32524), PRP9 (P19736)	3	0	0.67 [('nuclear mRNA splicing, via spliceosome', '2.02e-03')]	1.0 [('SPLICEOSOMAL COMPLEX', '6.30e-06'), ('U2 snRNP', '7.43e-08')]	1.0 [('RNA binding', '5.84e-04')]
656	VPS35-VPS29-VPS26A complex	VP26A (O75436), VPS29 (Q9UBQ0), VPS35 (Q96QK1)	3	PEP11 (P38759), VPS26 (P40335), VPS35 (P34110)	3	0	1.0 [('PROTEIN TRANSPORT', '1.64e-04'), ('retrograde transport, endosome to Golgi', '1.39e-07')]	1.0 [('ENDOSOME', '8.92e-06'), ('retromer complex, inner shell', '2.04e-10')]	0.67 []
3008	60S APC containing complex	APC (P25054), IQGA1 (P46940), TBA1A (Q71U36), TBA1B (P68363), TBA1C (Q9BQE3), TBG1 (P23258), TBG2 (Q9NRH3)	7	TBA1 (P09733), TBA3 (P09734), TBG (P53378)	3	0	1.0 [('PROTEIN POLYMERIZATION', '4.49e-09')]	0.67 [('PROTEIN COMPLEX', '4.97e-05'), ('cytoplasmic microtubule', '1.85e-04'), ('kinetochore microtubule', '4.97e-05'), ('nuclear microtubule', '4.97e-05'), ('polar microtubule', '7.11e-06'), ('spindle pole body', '2.77e-03')]	1.0 [('GTP BINDING', '6.22e-05'), ('GTPASE ACTIVITY', '1.46e-05'), ('structural constituent of cytoskeleton', '6.37e-06')]
243	RalBP1-CDC2-CCNB1 complex	CCNB1 (P14635), CDC2 (P06493), RBP1 (Q15311)	3	CDC28 (P00546), CG21 (P24868), CG22 (P24869), CG23 (P24870), CG24 (P24871), CGS5 (P30283), CGS6 (P32943), kin28 (P06242)	8	1	1.0 [('CELL DIVISION', '2.10e-12')]	0.88 [('nucleus', '1.74e-04')]	0.75 []
2921	SHARP-CtBP complex	CTBP1 (Q13363), CTBP2 (P56545), MINT (Q96T58)	3	SER33 (P40510), SERA (P40054), fdh1 (Q08911), fdh2 (Q08987), yn14 (P53839)	5	3	1.0 [('OXIDATION REDUCTION', '2.79e-07')]	0.6 []	1.0 [('NAD OR NADH BINDING', '1.79e-12')]
1144	Cleavage and polyadenylation factor (CPSF)	CPSF1 (Q10570), CPSF2 (Q9P2I0), CPSF3 (Q9UKF6), CPSF4 (O95639), FIP1 (Q6UN15)	5	CFT1 (Q06632), CFT2 (Q12102), FIP1 (P45976), YSH1 (Q06224), YTH1 (Q06102)	5	0	1.0 [('mRNA cleavage', '4.99e-12'), ('mRNA polyadenylation', '1.01e-12')]	1.0 [('mRNA cleavage and polyadenylation specificity factor complex', '3.53e-13')]	0.6 [('RNA BINDING', '4.34e-03')]
5380	TRBP containing complex (DICER, RPL7A, EIF6, MOV10 and subunits of the 60S ribosomal particle)	DICER (Q9UPY3), IF6 (P56537), MOV10 (Q9HCE1), RL10A (P62906), RL11 (P62913), RL12 (P30050), RL13 (P26373), RL14 (P50914), RL15 (P61313), RL18A (Q02543), RL19 (P84098), RL21 (P46778), RL27 (P61353), RL28 (P46779), RL30 (P62888), RL32 (P62910), RL34 (P49207), RL35A (P18077), RL36 (Q9Y3U8), RL37A (P61513), RL7 (P18124), RL7A (P62424), RLA1 (P05386), RLA2 (P05387), RLP24 (Q9UHA3)	25	RL20 (P0C2I0), RL36A (P05745), RL36B (O14455), RLA1 (P05318), RLA2 (P05319), RLA3 (P10622), RLA4 (P02400)	7	0	0.57 [('TRANSLATIONAL ELONGATION', '3.24e-09')]	1.0 [('CYTOSOLIC LARGE RIBOSOMAL SUBUNIT', '1.44e-13')]	1.0 [('STRUCTURAL CONSTITUENT OF RIBOSOME', '2.36e-10')]
561	LSm1-7 complex	LSM1 (O15116), LSM2 (Q9Y333), LSM3 (P62310), LSM4 (Q9Y4Z0), LSM5 (Q9Y4Y9), LSM6 (P62312), LSM7 (Q9UK45)	7	LSM1 (P47017), LSM2 (P38203), LSM3 (P57743), LSM4 (P40070), LSM5 (P40089), LSM6 (Q06406), LSM7 (P53905)	7	0	0.86 [('mRNA catabolic process', '1.98e-15'), ('nuclear mRNA splicing, via spliceosome', '1.28e-10'), ('rRNA processing', '1.48e-09'), ('tRNA processing', '8.14e-14')]	0.86 [('U4/U6 x U5 tri-snRNP complex', '7.90e-13'), ('U6 snRNP', '1.98e-15'), ('nucleolus', '9.18e-08'), ('small nucleolar ribonucleoprotein complex', '1.98e-15')]	0.86 [('RNA binding', '7.98e-07')]
310	Cell cycle kinase complex CDC2	CCNB1 (P14635), CCNB2 (O95067), CCND1 (P24385), CDC2 (P06493), CDN1A (P38936), PCNA (P12004)	6	CDC28 (P00546), CG21 (P24868), CG22 (P24869), CG23 (P24870), CG24 (P24871), CGS5 (P30283), CGS6 (P32943), kin28 (P06242), pcna (P15873)	9	2	0.89 [('CELL DIVISION', '1.84e-11')]	0.89 [('nucleus', '3.68e-05')]	0.78 []
181	26S proteasome	PRS10 (P62333), PRS4 (P62191), PRS6A (P17980), PRS6B (P43686), PRS7 (P35998), PRS8 (P62195), PSA1 (P25786), PSA2 (P25787), PSA3 (P25788), PSA4 (P25789), PSA5 (P28066), PSA6 (P60900), PSA7 (O14818), PSB1 (P20618), PSB2 (P49721), PSB3 (P49720), PSB4 (P28070), PSB5 (P28074), PSB6 (P28072), PSB7 (Q99436), PSD13 (Q9UNM6), PSMD4 (P55036)	22	PRS10 (P53549), PRS4 (P40327), PRS6A (P33297), PRS6B (P33298), PRS7 (P33299), PRS8 (Q01939), PSA1 (P40302), PSA2 (P23639), PSA3 (P21242), PSA4 (P23638), PSA6 (P21243), PSA7 (P40303), PSB1 (P23724), PSB2 (P22141), PSB3 (P25451), PSB4 (P30657), PSB5 (P30656), PSB6 (P38624), RPN10 (P38886), RPN9 (Q04062), psa5 (P32379), psb7 (P25043)	22	2	1.0 [('ubiquitin-dependent protein catabolic process', '8.80e-16')]	0.91 [('nucleus', '1.94e-12')]	0.64 [('THREONINE-TYPE ENDOPEPTIDASE ACTIVITY', '8.80e-16')]
4399	EIF3 complex (EIF3B, EIF3J, EIF3I)	EIF3B (P55884), EIF3I (Q13347), EIF3J (O75822)	3	EIF3B (P06103), EIF3I (P40217), EIF3J (Q05775), eif2a (P53235)	4	1	0.75 [('TRANSLATIONAL INITIATION', '2.66e-06')]	0.75 [('EUKARYOTIC TRANSLATION INITIATION FACTOR 3 COMPLEX', '1.71e-08')]	1.0 [('TRANSLATION INITIATION FACTOR ACTIVITY', '5.47e-09')]
1890	ELK1-SRF-ELK4 complex	ELK1 (P19419), ELK4 (P28324), SRF (P11831)	3	ARGR1 (P07249), MCM1 (P11746)	2	0	1.0 [('transcription', '1.67e-02')]	0.5 []	1.0 [('TRANSCRIPTION FACTOR ACTIVITY', '2.19e-03')]
3544	COG2-COG3-COG4 subcomplex	COG2 (Q14746), COG3 (Q96JB2), COG4 (Q9H9E3)	3	COG3 (P40094), COG4 (Q06096)	2	0	1.0 [('retrograde transport, vesicle recycling within Golgi', '2.58e-06')]	1.0 [('GOLGI TRANSPORT COMPLEX', '1.21e-05'), ('membrane', '1.61e-03')]	0.5 []
910	CRSP-Mediator 2 complex	MED14 (O60244), MED15 (Q96RN5), MED16 (Q9Y2X0), MED17 (Q9NVC6), MED18 (Q9BUE0), MED23 (Q9ULK4), MED24 (O75448), MED4 (Q9NPJ6), MED6 (O75586), MED7 (O43513)	10	MED6 (P38782), MED7 (Q08278)	2	0	1.0 [('regulation of transcription from RNA polymerase II promoter', '1.10e-03'), ('transcription from RNA polymerase II promoter', '4.86e-04')]	0.5 [('mediator complex', '1.59e-02')]	1.0 [('RNA POLYMERASE II TRANSCRIPTION MEDIATOR ACTIVITY', '1.09e-04')]
2203	BRD4-RFC complex	BRD4 (O60885), RFC1 (P35251), RFC2 (P35250), RFC3 (P40938), RFC4 (P35249), RFC5 (P40937)	6	CTF18 (P49956), RFC1 (P38630), RFC2 (P40348), RFC3 (P38629), RFC4 (P40339), RFC5 (P38251), bdf1 (P35817)	7	1	0.71 [('leading strand elongation', '7.39e-12'), ('mismatch repair', '4.28e-11')]	0.71 [('Ctf18 RFC-like complex', '7.76e-14'), ('DNA REPLICATION FACTOR C COMPLEX', '3.70e-15'), ('nucleus', '2.18e-02')]	1.0 [('protein binding', '2.26e-02')]
159	Condensin I-PARP-1-XRCC1 complex	CND1 (Q15021), CND2 (Q15003), CND3 (Q9BPX3), PARP1 (P09874), SMC2 (O95347), SMC4 (Q9NTJ3), XRCC1 (P18887)	7	CND1 (Q06156), CND2 (P38170), CND3 (Q06680), SMC2 (P38989), SMC4 (Q12267), smc1 (P32908), smc3 (P47037), smc6 (Q12749)	8	3	0.88 [('CELL DIVISION', '5.52e-10')]	0.63 [('nuclear condensin complex', '4.93e-15')]	0.88 []
1097	eIF3 complex (EIF3S6, EIF3S5, EIF3S4, EIF3S3, EIF3S6IP, EIF3S2, EIF3S9, EIF3S12, EIF3S10, EIF3S8, EIF3S1, EIF3S7, PCID1)	EIF3A (Q14152), EIF3B (P55884), EIF3C (Q99613), EIF3D (O15371), EIF3E (P60228), EIF3F (O00303), EIF3G (O75821), EIF3H (O15372), EIF3I (Q13347), EIF3J (O75822), EIF3K (Q9UBQ5), EIF3L (Q9Y262), EIF3M (Q7L2H7)	13	EIF3A (P38249), EIF3B (P06103), EIF3C (P32497), EIF3G (Q04067), EIF3I (P40217), EIF3J (Q05775), eif2a (P53235), rpn8 (Q08723)	8	2	0.75 [('TRANSLATIONAL INITIATION', '3.08e-12')]	0.75 [('EUKARYOTIC TRANSLATION INITIATION FACTOR 3 COMPLEX', '6.60e-16')]	0.88 [('TRANSLATION INITIATION FACTOR ACTIVITY', '8.84e-15')]
193	PA700-20S-PA28 complex	PRS10 (P62333), PRS4 (P62191), PRS6A (P17980), PRS6B (P43686), PRS7 (P35998), PRS8 (P62195), PSA1 (P25786), PSA2 (P25787), PSA3 (P25788), PSA4 (P25789), PSA5 (P28066), PSA6 (P60900), PSA7 (O14818), PSB1 (P20618), PSB2 (P49721), PSB3 (P49720), PSB4 (P28070), PSB5 (P28074), PSB6 (P28072), PSB7 (Q99436), PSD10 (O75832), PSD11 (O00231), PSD12 (O00232), PSD13 (Q9UNM6), PSD7 (P51665), PSDE (O00487), PS…	36	PRS10 (P53549), PRS4 (P40327), PRS6A (P33297), PRS6B (P33298), PRS7 (P33299), PRS8 (Q01939), PSA1 (P40302), PSA2 (P23639), PSA3 (P21242), PSA4 (P23638), PSA6 (P21243), PSA7 (P40303), PSB1 (P23724), PSB2 (P22141), PSB3 (P25451), PSB4 (P30657), PSB5 (P30656), PSB6 (P38624), PSD10 (P50086), RPN1 (P38764), RPN10 (P38886), RPN11 (P43588), RPN12 (P32496), RPN2 (P32565), RPN3 (P40016), RPN5 (Q12250), RP…	34	4	0.91 [('ubiquitin-dependent protein catabolic process', '6.60e-16')]	0.76 [('nucleus', '1.46e-12')]	0.68 [('PROTEIN BINDING', '1.97e-02')]
1186	ESCRT-III complex	CHM1A (Q9HD42), CHM1B (Q7LBR1), CHM2A (O43633), CHM2B (Q9UQN3), CHM4A (Q9BY43), CHM4B (Q9H444), CHM4C (Q96CF2), CHMP3 (Q9Y3E7), CHMP5 (Q9NZZ3), CHMP6 (Q96FZ7)	10	DID2 (P69771), DID4 (P36108), SNF7 (P39929), VPS24 (P36095), vps20 (Q04272), vps60 (Q03390)	6	2	0.83 [('PROTEIN TRANSPORT', '7.65e-07'), ('late endosome to vacuole transport', '1.09e-11')]	0.67 [('ESCRT III complex', '1.86e-12')]	0.83 [('identical protein binding', '1.26e-04')]
934	FACT-NEK9 complex	NEK9 (Q8TD19), SP16H (Q9Y5B9), SSRP1 (Q08945)	3	POB3 (Q04636), SPT16 (P32558), rt106 (P40161)	3	1	1.0 [('nucleosome assembly', '2.52e-07')]	0.67 [('FACT complex', '8.62e-07'), ('nuclear chromatin', '3.74e-04')]	0.67 []
2824	BRCA1-RAD51 complex	BRCA1 (P38398), RAD51 (Q06609)	2	RAD51 (P25454), RAD57 (P25301), dmc1 (P25453)	3	1	0.67 [('heteroduplex formation', '3.62e-05'), ('meiotic joint molecule formation', '3.88e-06'), ('telomere maintenance via recombination', '1.55e-04')]	0.67 [('CONDENSED NUCLEAR CHROMOSOME', '1.17e-04')]	1.0 [('ATP binding', '9.45e-03'), ('DNA-dependent ATPase activity', '2.94e-08')]
1470	pRb2/p130-multimolecular complex (DNMT1, E2F5, SuV39H1, HDAC1, RBL2)	DNMT1 (P26358), E2F5 (Q15329), HDAC1 (Q13547), RBL2 (Q08999), SUV91 (O43463)	5	HOS2 (P53096), RPD3 (P32561), hos1 (Q12214)	3	1	1.0 [('TRANSCRIPTION', '1.08e-03')]	0.67 [('Rpd3L-Expanded complex', '1.47e-04')]	0.67 [('histone deacetylase activity', '8.61e-06')]
1007	CAK core complex (Cdk-activating kinase core complex)	CCNH (P51946), CDK7 (P50613)	2	CCL1 (P37366), KIN28 (P06242), ssn8 (P47821)	3	1	0.67 [('TRANSCRIPTION INITIATION FROM RNA POLYMERASE II PROMOTER', '7.74e-04')]	0.67 [('holo TFIIH complex', '5.17e-06')]	1.0 [('general RNA polymerase II transcription factor activity', '1.49e-06')]
435	BASC (Ab 81) complex (BRCA1-associated genome surveillance complex)	ATM (Q13315), BRCA1 (P38398), MLH1 (P40692), RFC1 (P35251), RFC2 (P35250), RFC4 (P35249)	6	CTF18 (P49956), RFC1 (P38630), RFC2 (P40348), RFC3 (P38629), RFC4 (P40339), RFC5 (P38251), atm (P38110), atr (P38111), mlh1 (P38920), mlh3 (Q12083)	10	4	0.6 [('mismatch repair', '7.55e-13')]	0.7 [('nucleus', '2.43e-03')]	1.0 [('ATP BINDING', '1.73e-09'), ('protein binding', '1.38e-03')]
353	DNA ligase IV-condensin complex	DNLI4 (P49917), SMC2 (O95347), SMC4 (Q9NTJ3)	3	SMC1 (P32908), SMC3 (P47037), dnli1 (P04819), dnli4 (Q08387), smc2 (P38989), smc4 (Q12267), smc6 (Q12749)	7	5	0.86 [('CELL DIVISION', '2.16e-08')]	0.43 []	1.0 [('ATP BINDING', '1.13e-06'), ('protein binding', '1.51e-02')]
5211	RAF1-PPP2-PIN1 complex	2AAA (P30153), 2ABA (P63151), PIN1 (Q13526), PP2AB (P62714), RAF1 (P04049)	5	2AAA (P31383), 2ABA (Q00362), PP2A1 (P23594), PP2A2 (P23595), pp11 (P20604), pp2a4 (P32838), pp4c (P32345)	7	3	0.71 [('PROTEIN AMINO ACID DEPHOSPHORYLATION', '3.12e-10')]	0.71 [('nucleus', '1.09e-02')]	0.86 []
529	NuA4/Tip60 HAT complex	ACL6A (O96019), BRD8 (Q9H0E9), CA149 (Q9HAF1), DMAP1 (Q9NPF5), EP400 (Q96L91), EPC1 (Q9H2F5), ING3 (Q9NXR8), MO4L1 (Q9UBU8), MO4L2 (Q15014), MRGBP (Q9NV56), RUVB1 (Q9Y265), RUVB2 (Q9Y230), TIP60 (Q92993), TRRAP (Q9Y4A5), VPS72 (Q15906), YETS4 (O95619)	16	AF9 (P53930), ARP4 (P80428), EPL1 (P43572), ESA1 (Q08649), RUVB1 (Q03940), RUVB2 (Q12464), SAS3 (P34218), SWC4 (P53201), SWR1 (Q05471), TRA1 (P38811), eaf3 (Q12432), pho23 (P50947), sas2 (P40963), yng1 (Q08465)	14	4	0.93 [('TRANSCRIPTION', '1.13e-14')]	0.5 [('NUA4 HISTONE ACETYLTRANSFERASE COMPLEX', '7.78e-16')]	0.86 [('protein binding', '6.52e-03')]
2748	Ubiquitin-protein ligase (UBE2N, UBE2V2/MMS2)	UB2V1 (Q13404), UBE2N (P61088)	2	MMS2 (P53152), UBC13 (P52490), ubc1 (P21734), ubc12 (P52491)	4	2	1.0 [('regulation of protein metabolic process', '2.54e-10')]	0.5 [('ubiquitin conjugating enzyme complex', '2.58e-06')]	0.75 []
3054	MAD1-mSin3A-HDAC2 complex	HDAC2 (Q92769), MAD1 (Q05195), SIN3A (Q96ST3)	3	HOS2 (P53096), RPD3 (P32561), SIN3 (P22579), hos1 (Q12214)	4	1	1.0 [('TRANSCRIPTION', '1.04e-04')]	0.75 [('Rpd3L-Expanded complex', '9.47e-07')]	0.5 [('histone deacetylase activity', '2.58e-05'), ('transcription coactivator activity', '3.94e-04'), ('transcription corepressor activity', '2.71e-04')]
2718	MAD2-CDC20 complex	CDC20 (Q12834), MD2L1 (Q13257)	2	AMA1 (P50082), CDC20 (P26309), CDH1 (P53197), mad2 (P40958)	4	1	1.0 [('CELL DIVISION', '3.51e-06')]	0.75 [('anaphase-promoting complex', '3.65e-07')]	0.5 [('protein binding, bridging', '6.47e-04')]
285	PCNA-MLH1-PMS1 complex	MLH1 (P40692), PCNA (P12004), PMS1 (P54277)	3	MLH1 (P38920), MLH2 (Q07980), PMS1 (P14242), mlh3 (Q12083)	4	1	0.75 [('reciprocal meiotic recombination', '5.84e-06')]	0.5 [('MutLalpha complex', '2.58e-06'), ('MutLbeta complex', '2.58e-06')]	1.0 [('ATP binding', '1.10e-03'), ('MISMATCHED DNA BINDING', '1.30e-11')]
2856	NuA4/Tip60 HAT complex	ACL6A (O96019), BRD8 (Q9H0E9), DMAP1 (Q9NPF5), EP400 (Q96L91), EPC1 (Q9H2F5), ING3 (Q9NXR8), MO4L1 (Q9UBU8), RUVB1 (Q9Y265), TIP60 (Q92993), TRRAP (Q9Y4A5)	10	ARP4 (P80428), EPL1 (P43572), ESA1 (Q08649), RUVB1 (Q03940), RUVB2 (Q12464), SAS3 (P34218), SWC4 (P53201), SWR1 (Q05471), TRA1 (P38811), eaf3 (Q12432), pho23 (P50947), sas2 (P40963), yng1 (Q08465)	13	4	0.92 [('TRANSCRIPTION', '1.68e-13')]	0.46 [('NUA4 HISTONE ACETYLTRANSFERASE COMPLEX', '2.93e-13')]	0.85 [('protein binding', '1.25e-02')]
160	Condensin II	CNDD3 (P42695), CNDG2 (Q86XI2), CNDH2 (Q6IBW4), SMC2 (O95347), SMC4 (Q9NTJ3)	5	SMC1 (P32908), SMC3 (P47037), smc2 (P38989), smc4 (Q12267), smc6 (Q12749)	5	3	0.8 [('CELL DIVISION', '2.57e-05')]	0.4 [('nuclear condensin complex', '4.30e-05'), ('nuclear mitotic cohesin complex', '2.58e-05')]	1.0 [('ATP binding', '1.27e-04')]
5253	MNK1-eIF4F complex	IF4A1 (P60842), IF4E (P06730), IF4G1 (Q04637), IF4G2 (P78344), MKNK1 (Q9BUB5)	5	FAL1 (Q12099), IF4A (P10081), IF4E (P07260), IF4F1 (P39935), dhh1 (P39517)	5	1	0.6 [('regulation of translation', '5.93e-06'), ('translational initiation', '1.10e-05')]	0.6 [('EUKARYOTIC TRANSLATION INITIATION FACTOR 4F COMPLEX', '8.17e-09'), ('ribosome', '5.93e-06')]	1.0 [('RNA binding', '1.37e-06')]
1030	CAK-ERCC2 complex	CCNH (P51946), CDK7 (P50613), ERCC2 (P18074), MAT1 (P51948)	4	CCL1 (P37366), KIN28 (P06242), RAD3 (P06839), TFB3 (Q03290), ssn8 (P47821)	5	1	0.6 [('TRANSCRIPTION INITIATION FROM RNA POLYMERASE II PROMOTER', '1.49e-05')]	0.6 [('holo TFIIH complex', '4.90e-09')]	1.0 []
1059	Retromer complex (SNX1, SNX2, VPS35, VPS29, VPS26A)	SNX1 (Q13596), SNX2 (O60749), VP26A (O75436), VPS29 (Q9UBQ0), VPS35 (Q96QK1)	5	PEP11 (P38759), VPS26 (P40335), VPS35 (P34110), VPS5 (Q92331), snx4 (P47057)	5	1	0.8 [('PROTEIN TRANSPORT', '2.03e-05'), ('retrograde transport, endosome to Golgi', '1.47e-09')]	0.8 [('ENDOSOME', '4.15e-07')]	0.6 [('identical protein binding', '2.49e-02')]
752	SMRT core complex	HDAC3 (O15379), NCOR2 (Q9Y618), TBL1X (O60907)	3	HOS2 (P53096), RPD3 (P32561), SIF2 (P38262), SNT1 (P25357), hos1 (Q12214)	5	1	0.8 [('histone deacetylation', '5.86e-09')]	0.8 [('Rpd3L-Expanded complex', '1.80e-09')]	0.6 []
1737	SF3b complex	DDX42 (Q86XP3), PHF5A (Q7RTV0), PM14 (Q9Y3B4), SF3B1 (O75533), SF3B2 (Q13435), SF3B3 (Q15393), SF3B4 (Q15427), SF3B5 (Q9BWJ5)	8	CUS1 (Q02554), HSH49 (Q99181), RDS3 (Q06835), RSE1 (Q04693), SF3B1 (P49955), prp5 (P21372)	6	1	0.5 [('spliceosome assembly', '2.05e-07')]	0.83 [('U2 snRNP', '1.06e-12')]	0.83 []
1544	PPP2CA-PPP2R1A-PPP2R3A complex	2AAA (P30153), P2R3A (Q06190), PP2AA (P67775)	3	2AAA (P31383), PP2A1 (P23594), PP2A2 (P23595), pp11 (P20604), pp2a4 (P32838), pp4c (P32345)	6	3	0.67 [('PROTEIN AMINO ACID DEPHOSPHORYLATION', '7.24e-08')]	0.67 []	0.83 [('iron ion binding', '2.52e-08'), ('manganese ion binding', '1.20e-09')]
3015	p27-cyclinE-Cdk2 - Ubiquitin E3 ligase (SKP1A, SKP2, CUL1, CKS1B, RBX1) complex	CCNE1 (P24864), CDK2 (P24941), CDN1B (P46527), CKS1 (P61024), CUL1 (Q13616), RBX1 (P62877), SKP1 (P63208), SKP2 (Q13309)	8	CDC28 (P00546), CKS1 (P20486), PHO85 (P17157), cdc53 (Q12018), rbx1 (Q08273), skp1 (P52286)	6	3	0.5 [('G1/S TRANSITION OF MITOTIC CELL CYCLE', '6.00e-05'), ('G2/M transition of mitotic cell cycle', '2.80e-05'), ('SCF-dependent proteasomal ubiquitin-dependent protein catabolic process', '4.79e-07'), ('cell division', '3.78e-03'), ('protein ubiquitination during ubiquitin-dependent protein catabolic process', '4.63e-06')]	1.0 [('nucleus', '3.22e-04')]	0.67 []
1003	RC complex (Replication competent complex)	CCNA2 (P20248), CDK2 (P24941), DPOA2 (Q14181), DPOLA (P09884), RFC1 (P35251), RFC2 (P35250), RFC3 (P40938), RFC4 (P35249), RFC5 (P40937)	9	CTF18 (P49956), DPOA (P13382), DPOA2 (P38121), RFC1 (P38630), RFC2 (P40348), RFC3 (P38629), RFC4 (P40339), RFC5 (P38251), cdc28 (P00546), dpod (P15436), dpoz (P14284), pho85 (P17157)	12	4	0.5 [('leading strand elongation', '3.68e-13'), ('mismatch repair', '3.31e-12')]	0.67 [('nucleus', '1.56e-03')]	1.0 [('protein binding', '2.78e-04')]
1100	DNA polymerase alpha-primase complex	DPOA2 (Q14181), DPOLA (P09884), PRI1 (P49642), PRI2 (P49643)	4	DPOA (P13382), DPOA2 (P38121), PRI1 (P10363), PRI2 (P20457), dpod (P15436), dpoz (P14284)	6	2	0.67 [('DNA replication initiation', '3.24e-08'), ('lagging strand elongation', '1.32e-09')]	0.67 [('alpha DNA polymerase', '1.86e-12')]	0.83 [('DNA BINDING', '2.06e-06')]
2990	mTOR-signaling complex (FRAP1/mTOR, GBL, RAPTOR)	FRAP (P42345), LST8 (Q9BVC4), RPTOR (Q8N122)	3	KOG1 (P38873), LST8 (P41318), TOR1 (P35169), TOR2 (P32600), atm (P38110), atr (P38111), tra1 (P38811)	7	3	0.57 [('TOR signaling pathway', '7.36e-09'), ('regulation of cell growth', '1.78e-09')]	0.57 [('TORC1 COMPLEX', '2.71e-11'), ('mitochondrion', '1.31e-02')]	1.0 [('protein binding', '1.89e-02')]
3063	Brg1-associated complex II	ACL6A (O96019), ANM5 (O14744), ARI1A (O14497), SMCA4 (P51532), SMRC1 (Q92922), SMRC2 (Q8TAQ2), SNF5 (Q12824)	7	RSC8 (P43609), SFH1 (Q06168), SNF2 (P22082), STH1 (P32597), SWI3 (P32591), arp4 (P80428), ybv8 (P38266)	7	2	0.71 [('ATP-dependent chromatin remodeling', '3.74e-11')]	0.43 [('RSC complex', '2.89e-06')]	1.0 [('protein binding', '1.13e-02')]
2685	RNA polymerase II (RNAPII)	CTDP1 (Q9Y5B0), RPAB1 (P19388), RPAB2 (P61218), RPAB3 (P52434), RPAB4 (P53803), RPAB5 (P62875), RPAP1 (Q9BWH6), RPB1 (P24928), RPB11 (P52435), RPB2 (P30876), RPB3 (P19387), RPB4 (O15514), RPB7 (P62487), RPB9 (P36954), T2FA (P35269), T2FB (P13984), TF2B (Q00403)	17	RPA1 (P10964), RPAB1 (P20434), RPAB2 (P20435), RPAB3 (P20436), RPAB5 (P22139), RPAC1 (P07703), RPAC2 (P28000), RPB1 (P04050), RPB11 (P38902), RPB2 (P08518), RPB3 (P16370), RPB4 (P20433), RPB7 (P34087), RPB9 (P27999), RPC1 (P04051), RPC2 (P22276), fcp1 (Q03254), tf2b (P29055)	18	2	0.56 [('transcription from RNA polymerase II promoter', '6.60e-16')]	0.61 [('DNA-directed RNA polymerase II, core complex', '6.60e-16')]	0.89 [('DNA-DIRECTED RNA POLYMERASE ACTIVITY', '6.60e-16')]
3269	RB1-HDAC1-BRG1 complex	HDAC1 (Q13547), RB (P06400), SMCA4 (P51532)	3	HOS2 (P53096), SNF2 (P22082), hos1 (Q12214), rpd3 (P32561), sth1 (P32597)	5	3	0.8 [('TRANSCRIPTION', '2.47e-04')]	0.4 [('Rpd3L-Expanded complex', '3.66e-04')]	0.8 []
2162	APPBP1-UBA3 complex	UBA3 (Q8TBC4), ULA1 (Q13564)	2	UBA3 (Q99344), ULA1 (Q12059), rhc31 (Q06624), uba2 (P52488), uba4 (P38820)	5	3	0.8 [('MODIFICATION-DEPENDENT PROTEIN CATABOLIC PROCESS', '2.10e-07')]	0.4 [('SUMO activating enzyme complex', '2.87e-06')]	0.8 [('ATP binding', '3.32e-03')]
1166	p400-associated complex	ACL6A (O96019), ACL6B (O94805), ACTB (P60709), EP400 (Q96L91), RUVB1 (Q9Y265), RUVB2 (Q9Y230), TRRAP (Q9Y4A5)	7	ARP4 (P80428), ARP5 (P53946), RUVB1 (Q03940), RUVB2 (Q12464), SWR1 (Q05471), TRA1 (P38811), act (P60010), arp1 (P38696), arp2 (P32381), arp7 (Q12406)	10	4	0.6 [('TRANSCRIPTION', '4.77e-05')]	0.5 [('Ino80 complex', '2.33e-11'), ('Swr1 complex', '3.78e-11')]	0.9 [('protein binding', '1.82e-02')]
370	MSH2-MSH6-PMS1-MLH1 complex	MLH1 (P40692), MSH2 (P43246), MSH6 (P52701), PMS1 (P54277)	4	MSH2 (P25847), MSH3 (P25336), MSH6 (Q03834), msh1 (P25846), msh4 (P40965)	5	2	0.6 [('meiotic mismatch repair', '1.37e-07')]	0.4 [('MUTSALPHA COMPLEX', '4.31e-06'), ('MutSbeta complex', '4.31e-06'), ('nuclear chromosome', '3.90e-04')]	1.0 [('ATP BINDING', '1.27e-04')]
297	PCNA-DNA polymerase delta complex	DPOD1 (P28340), DPOD2 (P49005), DPOD3 (Q15054), DPOD4 (Q9HCU8), PCNA (P12004)	5	DPOD (P15436), DPOD2 (P46957), PCNA (P15873), dpoa (P13382), dpoz (P14284)	5	2	0.6 [('RNA-dependent DNA replication', '4.08e-08'), ('base-excision repair', '4.89e-07'), ('leading strand elongation', '1.48e-06'), ('nucleotide-excision repair', '5.40e-06'), ('postreplication repair', '1.85e-06')]	0.4 [('delta DNA polymerase complex', '2.15e-05')]	1.0 [('DNA binding', '8.85e-07')]
5718	eNOS-HSP90-AKT complex, VEGF induced	AKT1 (P31749), HS90A (P07900), NOS3 (P29474)	3	HSC82 (P15108), HSP82 (P02829), sch9 (P11792)	3	1	0.67 [('proteasome assembly', '1.37e-04')]	0.33 []	1.0 [('ATP binding', '1.10e-02')]
2170	Ubiquitin E3 ligase (CDC34, CUL1, RBX1)	CUL1 (Q13616), RBX1 (P62877), UB2R1 (P49427)	3	CDC53 (Q12018), RBX1 (Q08273), UBC3 (P14682), ubc7 (Q02159)	4	1	0.75 [('G1/S TRANSITION OF MITOTIC CELL CYCLE', '1.73e-05'), ('G2/M transition of mitotic cell cycle', '8.07e-06'), ('SCF-dependent proteasomal ubiquitin-dependent protein catabolic process', '1.37e-07'), ('protein ubiquitination during ubiquitin-dependent protein catabolic process', '1.33e-06')]	0.75 [('SCF ubiquitin ligase complex', '3.59e-07')]	0.5 [('ubiquitin-protein ligase activity', '4.41e-03')]
513	TFTC complex (TATA-binding protein-free TAF-II-containing complex)	ATX7 (O15265), GCNL2 (Q92830), SF3B3 (Q15393), SUPT3 (O75486), TAD3L (O75528), TAF10 (Q12962), TAF12 (Q16514), TAF2 (Q6P1X5), TAF4 (O00268), TAF5 (Q15542), TAF5L (O75529), TAF6 (P49848), TAF6L (Q9Y6J9), TAF7 (Q15545), TAF9 (Q16594), TAF9B (Q9HBM6), TRRAP (Q9Y4A5)	17	GCN5 (Q03330), SPT3 (P06844), TAF10 (Q12030), TAF12 (Q03761), TAF5 (P38129), TAF6 (P53040), TAF7 (Q05021), TAF9 (Q05027), TRA1 (P38811), gblp (P38011), rse1 (Q04693), taf2 (P23255)	12	3	0.67 [('histone acetylation', '1.00e-14')]	0.67 [('SAGA complex', '8.80e-16'), ('SLIK (SAGA-like) complex', '8.80e-16')]	0.58 [('general RNA polymerase II transcription factor activity', '2.10e-12')]
1005	RC complex during G2/M-phase of cell cycle	CCNA2 (P20248), CCNB1 (P14635), CDC2 (P06493), DPOD1 (P28340), DPOE1 (Q07864), DPOLA (P09884), PARP1 (P09874), RFA1 (P27694), RFA2 (P15927), RFA3 (P35244), RFC1 (P35251), RFC2 (P35250), TOP1 (P11387)	13	CTF18 (P49956), DPOA (P13382), DPOE (P21951), RFC1 (P38630), RFC2 (P40348), RFC3 (P38629), RFC4 (P40339), RFC5 (P38251), cdc28 (P00546), cg21 (P24868), cg22 (P24869), cg23 (P24870), cg24 (P24871), cgs5 (P30283), cgs6 (P32943), dpod (P15436), dpoz (P14284), kin28 (P06242), rfa1 (P22336), rfa2 (P26754), top1 (P04786)	21	13	0.43 [('cell division', '1.32e-08')]	0.62 [('nucleus', '5.12e-05')]	0.86 [('PROTEIN BINDING', '4.36e-04')]
190	Mitotic checkpoint complex (MCC)	BUB1B (O60566), BUB3 (O43684), CDC20 (Q12834), MD2L1 (Q13257)	4	BUB3 (P26449), CDC20 (P26309), MAD2 (P40958), MAD3 (P47074), ama1 (P50082), bub1 (P41695), cdh1 (P53197), gle2 (P40066)	8	4	0.63 [('cell division', '4.12e-06')]	0.5 [('mitotic checkpoint complex', '6.50e-12')]	0.75 []
424	EXO1-MLH1-PCNA complex	EXO1 (Q9UQ84), MLH1 (P40692), PCNA (P12004)	3	PCNA (P15873), RAD27 (P26793), din7 (Q12086), exo1 (P39875), mlh1 (P38920), mlh3 (Q12083)	6	4	0.33 [('MISMATCH REPAIR', '9.13e-04'), ('meiotic mismatch repair', '1.50e-04'), ('reciprocal meiotic recombination', '2.97e-03')]	0.67 []	0.83 []
5755	SUMO1-SUA1-UBA2 complex	SAE1 (Q9UBE0), SAE2 (Q9UBT2), SUMO1 (P63165)	3	RHC31 (Q06624), UBA2 (P52488), smt3 (Q12306), uba3 (Q99344), uba4 (P38820)	5	3	0.8 [('MODIFICATION-DEPENDENT PROTEIN CATABOLIC PROCESS', '2.62e-07')]	0.4 [('SUMO activating enzyme complex', '3.59e-06')]	0.6 []
5165	AP1G1-PACS1-FURIN complex	AP1G1 (O43747), FURIN (P09958), PACS1 (Q6VY07)	3	AP2A (P38065), AP3D (Q08951), ap1g1 (Q12028), kex2 (P13134)	4	2	0.75 [('intracellular protein transport', '6.65e-05')]	0.25 []	0.75 [('protein transporter activity', '5.08e-06')]
1160	ING1-p300-PCNA complex	EP300 (Q09472), ING1 (Q9UK53), PCNA (P12004)	3	YNG2 (P38806), pcna (P15873), yng1 (Q08465)	3	2	0.67 [('histone acetylation', '1.50e-03')]	0.33 [('PCNA COMPLEX', '5.12e-03'), ('Piccolo NuA4 histone acetyltransferase complex', '1.53e-02')]	0.67 [('methylated histone residue binding', '6.97e-05')]
1751	SMN complex	DDX20 (Q9UHI6), GEMI2 (O14893), GEMI4 (P57678), GEMI5 (Q8TEQ6), GEMI6 (Q8WXD5), GEMI7 (Q9H840), RSMB (P14678), SMN (Q16637), SNRPA (P09012), STRAP (Q9Y3F4)	10	MSL1 (P40567), RSMB (P40018), eif3i (P40217)	3	1	0.67 [('nuclear mRNA splicing, via spliceosome', '3.23e-03')]	0.33 []	0.67 []
2755	17S U2 snRNP	CH60 (P10809), CHERP (Q8IWX8), DDX46 (Q7L014), DHX15 (O43143), DNJC8 (O75937), HM20B (Q9P0W2), PHF5A (Q7RTV0), PM14 (Q9Y3B4), PUF60 (Q9UHX1), RSMB (P14678), RU2A (P09661), RU2B (P08579), RUXE (P62304), RUXF (P62306), RUXG (P62308), SF3A1 (Q15459), SF3A2 (Q15428), SF3A3 (Q12874), SF3B1 (O75533), SF3B2 (Q13435), SF3B3 (Q15393), SF3B4 (Q15427), SF3B5 (Q9BWJ5), SFRS1 (Q07955), SMD1 (P62314), SMD2 (P6…	33	CUS1 (Q02554), HSH49 (Q99181), MSL1 (P40567), PRP11 (Q07350), PRP21 (P32524), PRP43 (P53131), PRP9 (P19736), RSE1 (Q04693), RSMB (P40018), RUXE (Q12330), RUXF (P54999), RUXG (P40204), SF3B1 (P49955), SMD1 (Q02260), SMD2 (Q06217), SMD3 (P43321), dbp10 (Q12389), prp5 (P21372), rds3 (Q06835), rok1 (P45818)	20	4	0.6 [('NUCLEAR MRNA SPLICING, VIA SPLICEOSOME', '8.80e-16')]	0.45 [('U2 snRNP', '8.80e-16')]	0.6 [('RNA BINDING', '5.39e-11')]
806	BRM-SIN3A-HDAC complex	ACL6A (O96019), ANM5 (O14744), ARI1A (O14497), HDAC2 (Q92769), SIN3A (Q96ST3), SMCA2 (P51531), SMCE1 (Q969G3), SMRC1 (Q92922), SMRC2 (Q8TAQ2), SMRD1 (Q96GM5), SMRD2 (Q92925), SNF5 (Q12824)	12	MOT1 (P32333), RSC8 (P43609), SFH1 (Q06168), SNF2 (P22082), STH1 (P32597), SWI3 (P32591), arp4 (P80428), hos1 (Q12214), hos2 (P53096), rpd3 (P32561), sin3 (P22579), yab9 (P31380), ybv8 (P38266)	13	7	0.54 [('TRANSCRIPTION', '2.21e-05')]	0.23 [('RSC complex', '3.11e-05'), ('Rpd3L-Expanded complex', '4.42e-05')]	0.69 []

## Sheet: All yeast predictions
Prediction of yeast complexes by aligning human complexes to the yeast interactome (all predictions). #QCC/#TCC: number of query/target complex components; only significant GO terms are shown; those GO terms that also belong to the set of most abundant significant GO terms of the given query complex are highlighted in capitals; complexes are sorted by homogeneity, followed by the fraction and num…
Query complex ID	Query complex name	Query complex components	#QCC	Target complex components	#TCC	New	Biological process homogeneity	Cellular component homogeneity	Molecular function homogeneity
794	SNARE complex (VAMP2, SNAP25, STX1a, CPLX2)	CPLX2 (Q6PUV4), SNP25 (P60880), STX1A (Q16623), VAMP2 (P63027)	4	SNC1 (P31109), SSO1 (P32867), snc2 (P33328), sso2 (P39926)	4	2	1.0 [('Golgi to plasma membrane transport', '1.18e-09')]	1.0 [('integral to membrane', '2.75e-03')]	1.0 [('SNAP receptor activity', '9.87e-10')]
3177	GNA14-p115RhoGEF complex	ARHG1 (Q92888), GNA14 (O95837)	2	ROM2 (P51862), rom1 (P53046)	2	1	1.0 [('actin filament organization', '4.26e-04'), ('budding cell bud growth', '9.82e-05'), ('cell wall organization', '4.74e-03'), ('establishment of cell polarity', '3.62e-04'), ('regulation of Rho protein signal transduction', '8.62e-06'), ('small GTPase mediated signal transduction', '5.43e-04')]	1.0 [('intracellular', '2.85e-04')]	1.0 [('Rho guanyl-nucleotide exchange factor activity', '8.62e-06')]
2723	ATM-NBS1 complex	ATM (Q13315), NBN (O60934)	2	ATR (P38111), atm (P38110)	2	1	1.0 [('DNA damage induced protein phosphorylation', '5.03e-07'), ('histone phosphorylation', '5.03e-07')]	1.0 []	1.0 [('protein serine/threonine kinase activity', '2.06e-03')]
5369	ATM homodimer complex	ATM (Q13315)	1	ATR (P38111), atm (P38110)	2	1	1.0 [('DNA damage induced protein phosphorylation', '5.03e-07'), ('histone phosphorylation', '5.03e-07')]	1.0 []	1.0 [('protein serine/threonine kinase activity', '2.06e-03')]
1072	SNX complex (SNX2), oligomeric	SNX2 (O60749)	1	VPS5 (Q92331), snx4 (P47057)	2	1	1.0 [('cell communication', '1.68e-05')]	1.0 [('cytosol', '3.20e-03')]	1.0 [('phosphatidylinositol 3-phosphate binding', '5.45e-05')]
5385	GAIT complex	G3P (P04406), HNRPQ (O60506), RL13A (P40429), SYEP (P07814)	4	G3P1 (P00360), G3P2 (P00358), g3p3 (P00359)	3	1	1.0 [('gluconeogenesis', '2.50e-07'), ('glycolysis', '1.49e-06'), ('oxidation reduction', '5.51e-04')]	1.0 [('fungal-type cell wall', '2.19e-05'), ('lipid particle', '4.89e-07'), ('mitochondrion', '8.71e-03'), ('plasma membrane enriched fraction', '3.63e-05')]	1.0 [('NAD or NADH binding', '4.89e-07'), ('glyceraldehyde-3-phosphate dehydrogenase (phosphorylating) activity', '3.67e-10')]
1132	RFC2-RIalpha complex	2AAA (P30153), RFC4 (P35249)	2	RFC2 (P40348), RFC3 (P38629), RFC4 (P40339), RFC5 (P38251)	4	0	1.0 [('leading strand elongation', '3.10e-10'), ('mismatch repair', '1.20e-09'), ('sister chromatid cohesion', '1.55e-12')]	1.0 [('Ctf18 RFC-like complex', '1.08e-11'), ('DNA replication factor C complex', '1.55e-12'), ('Elg1 RFC-like complex', '1.55e-12'), ('Rad17 RFC-like complex', '1.55e-12'), ('nucleus', '1.29e-02')]	1.0 [('ATP binding', '1.83e-03')]
846	RICH1/AMOT polarity complex, Flag-Rich1 precipitated	AMOT (Q4VCS5), CAPZB (P47756), CAZA1 (P52907), CAZA2 (P47755), CD2AP (Q9Y5K6), INADL (Q8NI35), MPP5 (Q8N3R9), RHG17 (Q68EM7), SH3K1 (Q96B97)	9	CAPZA (P28495), CAPZB (P13517)	2	0	1.0 [('ACTIN CYTOSKELETON ORGANIZATION', '1.27e-04'), ('barbed-end actin filament capping', '5.03e-07')]	1.0 [('F-actin capping protein complex', '5.03e-07'), ('actin cortical patch', '6.41e-04'), ('actin filament', '3.02e-06'), ('mating projection tip', '2.54e-03')]	1.0 [('actin filament binding', '1.81e-05')]
1131	RFC2-RIalpha complex	2AAA (P30153), RFC2 (P35250)	2	RFC1 (P38630), RFC2 (P40348), RFC3 (P38629), RFC4 (P40339), RFC5 (P38251)	5	0	1.0 [('leading strand elongation', '3.53e-13'), ('mismatch repair', '2.05e-12')]	1.0 [('DNA replication factor C complex', '1.32e-15'), ('nucleus', '1.46e-03')]	1.0 [('ATP binding', '1.27e-04')]
27	Arp2/3 protein complex	ARC1B (O15143), ARP2 (P61160), ARP3 (P61158), ARPC2 (O15144), ARPC3 (O15145), ARPC4 (P59998), ARPC5 (O15511)	7	ARP2 (P32381), ARP3 (P47117), ARPC1 (P38328), ARPC2 (P53731), ARPC3 (Q05933), ARPC4 (P33204)	6	0	1.0 [('mitochondrion inheritance', '7.38e-14')]	1.0 [('ARP2/3 PROTEIN COMPLEX', '6.60e-16')]	1.0 [('ACTIN BINDING', '3.77e-14')]
5225	Casein kinase II (beta-dimer, alpha-dimer)	CSK21 (P68400), CSK2B (P67870)	2	CSK21 (P15790), CSK22 (P19454), CSK2B (P43639), CSK2C (P38930)	4	0	1.0 [('G1/S transition of mitotic cell cycle', '3.76e-08'), ('G2/M transition of mitotic cell cycle', '1.34e-08'), ('cellular ion homeostasis', '3.72e-10'), ('establishment of cell polarity', '2.19e-08'), ('flocculation via cell wall protein-carbohydrate interaction', '5.57e-12'), ('protein amino acid phosphorylation', '3.16e-06'), ('regulation of transcription from RNA polymerase I promoter', '5…	1.0 [('PROTEIN KINASE CK2 COMPLEX', '3.72e-13'), ('UTP-C complex', '5.57e-12')]	1.0 []
3127	TLE-Histone H3 complex	H31 (P68431), H32 (Q71DI3), H33 (P84243), TLE1 (Q04724), TLE2 (Q04725), TLE3 (Q04726), TLE4 (Q04727)	7	H3 (P61830)	1	0	1.0 []	1.0 [('nuclear nucleosome', '9.10e-03')]	1.0 []
3010	TFIID subcomplex	TAF12 (Q16514), TAF4 (O00268), TAF5 (Q15542), TAF6 (P49848), TAF9 (Q16594)	5	TAF12 (Q03761), TAF5 (P38129), TAF6 (P53040), TAF9 (Q05027)	4	0	1.0 [('TRANSCRIPTION INITIATION FROM RNA POLYMERASE II PROMOTER', '3.06e-08'), ('histone acetylation', '2.26e-08'), ('regulation of transcription during G1 phase of mitotic cell cycle', '5.90e-10')]	1.0 [('SAGA complex', '1.20e-09'), ('SLIK (SAGA-like) complex', '5.90e-10'), ('TRANSCRIPTION FACTOR TFIID COMPLEX', '3.38e-10')]	1.0 [('GENERAL RNA POLYMERASE II TRANSCRIPTION FACTOR ACTIVITY', '2.04e-08'), ('identical protein binding', '5.10e-04')]
1347	NPC subcomplex (NUP98, NUP107, NUP133, NUP160)	NU107 (P57740), NU133 (Q8WUM0), NU160 (Q12769), NUP98 (P52948)	4	NU100 (Q02629), NU116 (Q02630), NU145 (P49687), NUP42 (P49686), NUP49 (Q02199), NUP57 (P48837), NUP84 (P52891)	7	0	1.0 [('INTRACELLULAR PROTEIN TRANSMEMBRANE TRANSPORT', '5.76e-14'), ('NLS-bearing substrate import into nucleus', '2.86e-15'), ('mRNA export from nucleus', '1.17e-13'), ('mRNA-binding (hnRNP) protein import into nucleus', '2.86e-15'), ('nuclear pore organization', '2.86e-15'), ('protein export from nucleus', '2.86e-15'), ('rRNA export from nucleus', '1.30e-14'), ('ribosomal protein import into nu…	1.0 [('nuclear pore', '1.17e-13')]	1.0 [('structural molecule activity', '1.17e-13')]
5922	RAF1-RAS complex, EGF induced	RAF1 (P04049), RASH (P01112), RASK (P01116), RASN (P01111)	4	RAS1 (P01119), RAS2 (P01120)	2	0	1.0 [('RAS PROTEIN SIGNAL TRANSDUCTION', '4.57e-05'), ('replicative cell aging', '2.82e-04')]	1.0 [('PLASMA MEMBRANE', '1.49e-02'), ('intracellular', '2.49e-04')]	1.0 [('GTP BINDING', '2.24e-03'), ('GTPase activity', '8.60e-04')]
338	40S ribosomal subunit, cytoplasmic	RS10 (P46783), RS11 (P62280), RS12 (P25398), RS13 (P62277), RS14 (P62263), RS15 (P62841), RS15A (P62244), RS16 (P62249), RS17 (P08708), RS18 (P62269), RS19 (P39019), RS2 (P15880), RS20 (P60866), RS21 (P63220), RS23 (P62266), RS24 (P62847), RS25 (P62851), RS26 (P62854), RS27A (P62979), RS28 (P62857), RS29 (P62273), RS3 (P23396), RS30 (P62861), RS3A (P61247), RS4X (P62701), RS5 (P46782), RS6 (P6275…	31	RS0A (P32905), RS0B (P46654), RS11 (P26781), RS13 (P05756), RS17B (P14127), RS19A (P07280), RS19B (P07281), RS21A (P0C0V8), RS21B (Q3E754), RS3B (P23248), RS8 (P05754), RS9A (O13516), RS9B (P05755)	13	0	1.0 [('translation', '6.60e-16')]	1.0 [('CYTOSOLIC SMALL RIBOSOMAL SUBUNIT', '6.60e-16')]	1.0 [('STRUCTURAL CONSTITUENT OF RIBOSOME', '6.60e-16')]
1221	TFIIA-TRF2 complex	T2AG (P52657), TERF2 (Q15554), TF2AA (P52655)	3	TOA1 (P32773), TOA2 (P32774)	2	0	1.0 [('TRANSCRIPTION INITIATION FROM RNA POLYMERASE II PROMOTER', '3.24e-04'), ('regulation of transcription', '5.04e-03')]	1.0 [('TRANSCRIPTION FACTOR TFIIA COMPLEX', '3.59e-07')]	1.0 [('GENERAL RNA POLYMERASE II TRANSCRIPTION FACTOR ACTIVITY', '2.66e-04')]
786	MR-UBC9-SRC1 complex	MCR (P08235), NCOA1 (Q15788), PP2BA (Q08209)	3	PP2B1 (P23287), PP2B2 (P14747)	2	0	1.0 [('adaptation to pheromone during conjugation with cellular fusion', '3.79e-05'), ('cellular ion homeostasis', '5.23e-05')]	1.0 [('calcineurin complex', '1.72e-06')]	1.0 [('calmodulin binding', '3.79e-05'), ('iron ion binding', '1.96e-03'), ('phosphoprotein phosphatase activity', '2.58e-05')]
514	TFIID-beta complex	TAF1 (P21675), TAF10 (Q12962), TAF11 (Q15544), TAF12 (Q16514), TAF13 (Q15543), TAF4 (O00268), TAF5 (Q15542), TAF6 (P49848), TAF7 (Q15545), TAF9 (Q16594), TAF9B (Q9HBM6), TBP (P20226)	12	TAF1 (P46677), TAF10 (Q12030), TAF11 (Q04226), TAF12 (Q03761), TAF5 (P38129), TAF6 (P53040), TAF7 (Q05021), TAF9 (Q05027), TBP (P13393)	9	0	1.0 [('TRANSCRIPTION INITIATION FROM RNA POLYMERASE II PROMOTER', '6.60e-16')]	1.0 [('TRANSCRIPTION FACTOR TFIID COMPLEX', '6.60e-16')]	1.0 [('GENERAL RNA POLYMERASE II TRANSCRIPTION FACTOR ACTIVITY', '6.60e-16')]
5361	Cell division cycle complex (CDC27, CDC16, ANAPC7)	APC7 (Q9UJX3), CDC16 (Q13042), CDC27 (P30260)	3	CDC16 (P09798), CDC23 (P16522), CDC27 (P38042)	3	0	1.0 [('ANAPHASE-PROMOTING COMPLEX-DEPENDENT PROTEASOMAL UBIQUITIN-DEPENDENT PROTEIN CATABOLIC PROCESS', '1.17e-07'), ('cell division', '2.89e-04'), ('cyclin catabolic process', '8.98e-08'), ('mitotic metaphase/anaphase transition', '1.17e-07'), ('mitotic sister chromatid segregation', '1.84e-06'), ('mitotic spindle elongation', '7.23e-07'), ('protein ubiquitination', '3.45e-06')]	1.0 [('anaphase-promoting complex', '2.29e-07')]	1.0 [('ubiquitin-protein ligase activity', '6.20e-06')]
5613	Emerin complex 25	1433B (P31946), 1433E (P62258), ACTB (P60709), BAF (O75531), BCCIP (Q9P287), CDC37 (Q16543), EMD (P50402), G3BP1 (Q13283), HNRPK (P61978), LA (P05455), LMNB1 (P20700), LSM2 (Q9Y333), LSM8 (O95777), SMD1 (P62314), SP130 (Q9H0E3), ZRAB2 (O95218)	16	BMH1 (P29311), BMH2 (P34730)	2	0	1.0 [('DNA damage checkpoint', '6.72e-05'), ('Ras protein signal transduction', '7.84e-05'), ('ascospore formation', '1.01e-03'), ('cell wall chitin biosynthetic process', '5.69e-05'), ('glycogen metabolic process', '1.03e-04'), ('negative regulation of ubiquitin-protein ligase activity during mitotic cell cycle', '2.58e-06'), ('pseudohyphal growth', '1.42e-03'), ('signal transduction during fila…	1.0 [('plasma membrane enriched fraction', '3.08e-03')]	1.0 [('DNA replication origin binding', '3.26e-04'), ('protein domain specific binding', '2.58e-06')]
1174	PHAX-CBC complex (cap binding complex)	NCBP1 (Q09161), NCBP2 (P52298), PHAX (Q9H814)	3	NCBP1 (P34160), NCBP2 (Q08920)	2	0	1.0 [('mRNA transport', '6.84e-05'), ('nuclear mRNA splicing, via spliceosome', '9.51e-04'), ('nuclear-transcribed mRNA catabolic process, nonsense-mediated decay', '5.28e-05')]	1.0 [('commitment complex', '2.76e-05'), ('nuclear cap binding complex', '5.03e-07'), ('perinuclear region of cytoplasm', '4.57e-05')]	1.0 []
2772	Ubiquitin E3 ligase (CRY1, SKP1A, CUL1, FBXL3)	CRY1 (Q16526), CUL1 (Q13616), FBXL3 (Q9UKT7), SKP1 (P63208)	4	CDC53 (Q12018), SKP1 (P52286)	2	0	1.0 [('G1/S transition of mitotic cell cycle', '4.12e-04'), ('G2/M transition of mitotic cell cycle', '2.49e-04'), ('SCF-dependent proteasomal ubiquitin-dependent protein catabolic process', '1.81e-05'), ('protein ubiquitination during ubiquitin-dependent protein catabolic process', '7.69e-05')]	1.0 [('SCF ubiquitin ligase complex', '3.32e-05')]	1.0 [('DNA replication origin binding', '1.90e-04')]
1551	IPO13-RAN-EIF1AX complex	IF1AX (P47813), IPO13 (O94829), RAN (P62826)	3	GSP1 (P32835), GSP2 (P32836)	2	0	1.0 [('intracellular protein transport', '1.02e-03'), ('nucleocytoplasmic transport', '8.62e-06'), ('nucleus organization', '1.72e-06'), ('signal transduction', '3.83e-04')]	1.0 []	1.0 [('GTP binding', '2.56e-03'), ('GTPase activity', '9.83e-04')]
2716	Elongator core complex	ELP1 (O95163), ELP2 (Q6IA86), ELP3 (Q9H9T3)	3	ELP1 (Q06706), ELP2 (P42935), ELP3 (Q02908)	3	0	1.0 [('REGULATION OF TRANSCRIPTION FROM RNA POLYMERASE II PROMOTER', '1.95e-05'), ('TRANSCRIPTION', '2.16e-03'), ('protein transport', '2.63e-04'), ('tRNA wobble uridine modification', '7.51e-07')]	1.0 [('Elongator holoenzyme complex', '6.53e-09')]	1.0 []
67	AP4 adaptor complex	AP4B1 (Q9Y6B7), AP4E1 (Q9UPM8), AP4M1 (O00189), AP4S1 (Q9Y587)	4	AP3D (Q08951), AP3S (P47064)	2	0	1.0 [('Golgi to vacuole transport', '1.51e-04'), ('INTRACELLULAR PROTEIN TRANSPORT', '8.90e-04')]	1.0 [('Golgi apparatus', '1.88e-03'), ('cytoplasmic vesicle', '7.69e-05'), ('membrane coat', '7.54e-06')]	1.0 [('protein transporter activity', '1.63e-04')]
3714	Pericentrin-GCP complex	GCP2 (Q9BSJ2), GCP3 (Q96CW5), PCNT (O95613)	3	SPC97 (P38863), SPC98 (P53540)	2	0	1.0 [('MICROTUBULE NUCLEATION', '1.16e-04')]	1.0 [('gamma-tubulin small complex, spindle pole body', '1.51e-06'), ('inner plaque of spindle pole body', '3.02e-06'), ('microtubule', '2.04e-04'), ('outer plaque of spindle pole body', '5.03e-06')]	1.0 [('structural constituent of cytoskeleton', '4.98e-04')]
5919	BRAF-RAF1-14-3-3 complex	1433B (P31946), 1433E (P62258), 1433F (Q04917), 1433G (P61981), 1433S (P31947), 1433T (P27348), 1433Z (P63104), BRAF1 (P15056), RAF1 (P04049)	9	BMH1 (P29311), BMH2 (P34730)	2	0	1.0 [('DNA damage checkpoint', '6.72e-05'), ('RAS PROTEIN SIGNAL TRANSDUCTION', '7.84e-05'), ('ascospore formation', '1.01e-03'), ('cell wall chitin biosynthetic process', '5.69e-05'), ('glycogen metabolic process', '1.03e-04'), ('negative regulation of ubiquitin-protein ligase activity during mitotic cell cycle', '2.58e-06'), ('pseudohyphal growth', '1.42e-03'), ('signal transduction during fila…	1.0 [('plasma membrane enriched fraction', '3.08e-03')]	1.0 [('DNA replication origin binding', '3.26e-04'), ('PROTEIN DOMAIN SPECIFIC BINDING', '2.58e-06')]
2187	Ubiquitin E3 ligase (NFKBIA, FBXW11, BTRC, CUL1, SKP1A)	CUL1 (Q13616), FBW1A (Q9Y297), FBW1B (Q9UKB1), IKBA (P25963), SKP1 (P63208)	5	CDC53 (Q12018), SKP1 (P52286)	2	0	1.0 [('G1/S transition of mitotic cell cycle', '4.12e-04'), ('G2/M transition of mitotic cell cycle', '2.49e-04'), ('SCF-dependent proteasomal ubiquitin-dependent protein catabolic process', '1.81e-05'), ('protein ubiquitination during ubiquitin-dependent protein catabolic process', '7.69e-05')]	1.0 [('SCF ubiquitin ligase complex', '3.32e-05')]	1.0 [('DNA replication origin binding', '1.90e-04')]
5273	VHL-TBP1-HIF1A complex	HIF1A (Q16665), PRS6A (P17980), VHL (P40337)	3	PRS4 (P40327), PRS6A (P33297), PRS6B (P33298)	3	0	1.0 [('ubiquitin-dependent protein catabolic process', '1.70e-05')]	1.0 [('cytosol', '2.42e-04'), ('proteasome regulatory particle, base subcomplex', '2.40e-08')]	1.0 [('ATP binding', '1.10e-02'), ('ATPase activity', '6.32e-06'), ('endopeptidase activity', '3.43e-08')]
5223	Casein kinase II (beta-dimer, alpha'-dimer)	CSK22 (P19784), CSK2B (P67870)	2	CSK21 (P15790), CSK22 (P19454), CSK2B (P43639), CSK2C (P38930)	4	0	1.0 [('G1/S transition of mitotic cell cycle', '3.76e-08'), ('G2/M transition of mitotic cell cycle', '1.34e-08'), ('cellular ion homeostasis', '3.72e-10'), ('establishment of cell polarity', '2.19e-08'), ('flocculation via cell wall protein-carbohydrate interaction', '5.57e-12'), ('protein amino acid phosphorylation', '3.16e-06'), ('regulation of transcription from RNA polymerase I promoter', '5…	1.0 [('PROTEIN KINASE CK2 COMPLEX', '3.72e-13'), ('UTP-C complex', '5.57e-12')]	1.0 []
873	SNARE complex (STX1A, SNAP29)	SNP29 (O95721), STX1A (Q16623)	2	SSO1 (P32867), SSO2 (P39926)	2	0	1.0 [('Golgi to plasma membrane transport', '1.94e-04'), ('ascospore-type prospore formation', '9.69e-06'), ('intracellular protein transport', '1.14e-03')]	1.0 [('plasma membrane', '1.92e-02'), ('plasma membrane enriched fraction', '2.31e-03'), ('prospore membrane', '2.10e-04')]	1.0 [('SNAP RECEPTOR ACTIVITY', '1.78e-04'), ('phosphatidic acid binding', '3.88e-06')]
1700	ABL2-HRAS-RIN1 complex	ABL2 (P42684), RASH (P01112), RIN1 (Q13671)	3	RAS1 (P01119), RAS2 (P01120)	2	0	1.0 [('Ras protein signal transduction', '4.57e-05'), ('replicative cell aging', '2.82e-04')]	1.0 [('intracellular', '2.49e-04'), ('plasma membrane', '1.49e-02')]	1.0 [('GTP binding', '2.24e-03'), ('GTPase activity', '8.60e-04')]
2510	ZAP70-CRKL-WIPF1-WAS complex	CRKL (P46109), WASP (P42768), WIPF1 (O43516), ZAP70 (P43403)	4	LAS17 (Q12446), VRP1 (P37370)	2	0	1.0 [('actin cortical patch localization', '3.92e-05'), ('bipolar cellular bud site selection', '2.00e-04'), ('endocytosis', '1.26e-03')]	1.0 [('actin cortical patch', '5.49e-04'), ('mating projection tip', '2.18e-03')]	1.0 []
1192	ESCRT-I complex	TS101 (Q99816), VP37C (A5D8V6), VPS28 (Q9UK41)	3	STP22 (P25604), VPS28 (Q02767)	2	0	1.0 [('protein targeting to membrane', '3.27e-05'), ('protein targeting to vacuole', '2.66e-04'), ('ubiquitin-dependent protein catabolic process via the multivesicular body sorting pathway', '3.77e-05')]	1.0 [('ESCRT I complex', '2.15e-06')]	1.0 []
1318	Transcription initiation factor complex (TAF1, TAF5, TAF11, TAF12, TBP)	TAF1 (P21675), TAF11 (Q15544), TAF12 (Q16514), TAF5 (Q15542), TBP (P20226)	5	TAF1 (P46677), TAF11 (Q04226), TAF12 (Q03761), TAF5 (P38129), TBP (P13393)	5	0	1.0 [('TRANSCRIPTION INITIATION FROM RNA POLYMERASE II PROMOTER', '8.48e-11')]	1.0 [('TRANSCRIPTION FACTOR TFIID COMPLEX', '2.64e-13')]	1.0 [('GENERAL RNA POLYMERASE II TRANSCRIPTION FACTOR ACTIVITY', '5.07e-11')]
2204	MCM8-ORC2-CDC6 complex	CDC6 (Q99741), MCM8 (Q9UJA3), ORC2 (Q13416)	3	CDC6 (P09119), ORC1 (P54784), ORC2 (P32833)	3	0	1.0 [('pre-replicative complex assembly', '9.29e-08')]	1.0 [('DNA replication preinitiation complex', '2.72e-07'), ('pre-replicative complex', '9.29e-08')]	1.0 [('DNA replication origin binding', '6.69e-07'), ('chromatin binding', '2.18e-06')]
1750	PPP4C-PPP4R2-Gemin3-Gemin4 complex	DDX20 (Q9UHI6), GEMI4 (P57678), PP4C (P60510), PP4R2 (Q9NY27)	4	PP2A1 (P23594), PP2A2 (P23595)	2	0	1.0 [('G1/S transition of mitotic cell cycle', '6.48e-04'), ('actin filament organization', '5.85e-04'), ('budding cell bud growth', '1.35e-04'), ('mitotic cell cycle spindle assembly checkpoint', '1.50e-04'), ('protein amino acid dephosphorylation', '3.67e-04'), ('translation', '1.17e-02')]	1.0 [('protein phosphatase type 2A complex', '1.18e-05')]	1.0 [('iron ion binding', '2.69e-03'), ('manganese ion binding', '8.18e-04'), ('protein serine/threonine phosphatase activity', '9.48e-05')]
390	Ubiquitin E3 ligase (SKP1A, FBXW2, CUL1)	CUL1 (Q13616), FBXW2 (Q9UKT8), SKP1 (P63208)	3	CDC53 (Q12018), SKP1 (P52286)	2	0	1.0 [('G1/S transition of mitotic cell cycle', '4.12e-04'), ('G2/M transition of mitotic cell cycle', '2.49e-04'), ('SCF-dependent proteasomal ubiquitin-dependent protein catabolic process', '1.81e-05'), ('protein ubiquitination during ubiquitin-dependent protein catabolic process', '7.69e-05')]	1.0 [('SCF ubiquitin ligase complex', '3.32e-05')]	1.0 [('DNA replication origin binding', '1.90e-04')]
2205	ORC5-ORC1 complex	ORC1 (Q13415), ORC5 (O43913)	2	CDC6 (P09119), ORC1 (P54784), ORC5 (P50874)	3	0	1.0 [('pre-replicative complex assembly', '9.29e-08')]	1.0 [('DNA replication preinitiation complex', '2.72e-07'), ('pre-replicative complex', '9.29e-08')]	1.0 [('ATP binding', '7.88e-03'), ('DNA replication origin binding', '6.69e-07')]
1245	Protein phosphatase 4 complex	PP4C (P60510), PP4R2 (Q9NY27)	2	PP2A1 (P23594), PP2A2 (P23595)	2	0	1.0 [('G1/S transition of mitotic cell cycle', '6.48e-04'), ('actin filament organization', '5.85e-04'), ('budding cell bud growth', '1.35e-04'), ('mitotic cell cycle spindle assembly checkpoint', '1.50e-04'), ('protein amino acid dephosphorylation', '3.67e-04'), ('translation', '1.17e-02')]	1.0 [('protein phosphatase type 2A complex', '1.18e-05')]	1.0 [('iron ion binding', '2.69e-03'), ('manganese ion binding', '8.18e-04'), ('protein serine/threonine phosphatase activity', '9.48e-05')]
278	RFC core complex	RFC2 (P35250), RFC4 (P35249), RFC5 (P40937)	3	RFC1 (P38630), RFC2 (P40348), RFC3 (P38629), RFC4 (P40339), RFC5 (P38251)	5	0	1.0 [('leading strand elongation', '3.53e-13'), ('mismatch repair', '2.05e-12')]	1.0 [('DNA REPLICATION FACTOR C COMPLEX', '1.32e-15'), ('nucleus', '1.46e-03')]	1.0 [('ATP BINDING', '1.27e-04')]
1400	ASCOM complex	ASH2L (Q9UBL3), MLL2 (O14686), MLL3 (Q8NEZ4), NCOA6 (Q14686), RBBP5 (Q15291), TBA4A (P68366), TBB5 (P07437)	7	TBA1 (P09733), TBA3 (P09734), TBB (P02557)	3	0	1.0 [('homologous chromosome segregation', '5.72e-09'), ('mitotic sister chromatid segregation', '2.57e-06'), ('nuclear migration during conjugation with cellular fusion', '3.20e-08'), ('protein polymerization', '5.72e-09')]	1.0 [('cytoplasmic microtubule', '1.64e-07'), ('kinetochore microtubule', '2.00e-08'), ('nuclear microtubule', '2.00e-08'), ('polar microtubule', '5.72e-10'), ('protein complex', '2.00e-08'), ('spindle pole body', '1.05e-05')]	1.0 [('GTP binding', '7.91e-05'), ('GTPase activity', '1.86e-05'), ('structural constituent of cytoskeleton', '8.11e-06')]
5196	TNF-alpha/NF-kappa B signaling complex (CHUK, BTRC, NFKB2, PPP6C, REL, CUL1, IKBKE, SAPS2, SAPS1, ANKRD28, RELA, SKP1)	ANR28 (O15084), CUL1 (Q13616), FBW1A (Q9Y297), IKKA (O15111), IKKE (Q14164), NFKB2 (Q00653), PPP6 (O00743), REL (Q04864), SAPS1 (Q9UPN7), SAPS2 (O75170), SKP1 (P63208), TF65 (Q04206)	12	CDC53 (Q12018), SKP1 (P52286)	2	0	1.0 [('G1/S transition of mitotic cell cycle', '4.12e-04'), ('G2/M transition of mitotic cell cycle', '2.49e-04'), ('SCF-dependent proteasomal ubiquitin-dependent protein catabolic process', '1.81e-05'), ('protein ubiquitination during ubiquitin-dependent protein catabolic process', '7.69e-05')]	1.0 [('SCF ubiquitin ligase complex', '3.32e-05')]	1.0 [('DNA replication origin binding', '1.90e-04')]
443	BP-SMAD complex	BACH1 (O14867), BGH3 (Q15582), CXB6 (O95452), ERCC3 (P19447), KLF10 (Q13118), MXI1 (P50539), PRS6A (P17980), SMAD9 (O15198)	8	PRS4 (P40327), PRS6A (P33297), PRS6B (P33298)	3	0	1.0 [('ubiquitin-dependent protein catabolic process', '1.70e-05')]	1.0 [('cytosol', '2.42e-04'), ('proteasome regulatory particle, base subcomplex', '2.40e-08')]	1.0 [('ATP binding', '1.10e-02'), ('ATPase activity', '6.32e-06'), ('endopeptidase activity', '3.43e-08')]
2792	MCM2-MCM4-MCM6-MCM7 complex	MCM2 (P49736), MCM4 (P33991), MCM6 (Q14566), MCM7 (P33993)	4	CDC47 (P38132), CDC54 (P30665), MCM2 (P29469), MCM3 (P24279), MCM5 (P29496), MCM6 (P53091)	6	0	1.0 [('DNA REPLICATION INITIATION', '9.89e-14'), ('S phase of mitotic cell cycle', '2.20e-15'), ('TRANSCRIPTION', '7.10e-07'), ('pre-replicative complex assembly', '2.20e-15')]	1.0 [('DNA replication preinitiation complex', '1.81e-14'), ('MCM complex', '2.20e-15'), ('cytoplasm', '9.94e-04'), ('pre-replicative complex', '2.20e-15')]	1.0 [('ATP BINDING', '2.45e-05'), ('DNA replication origin binding', '1.26e-13')]
1187	ESCRT-II complex	SNF8 (Q96H20), VPS25 (Q9BRG1), VPS36 (Q86VN1)	3	SNF8 (Q12483), VPS25 (P47142)	2	0	1.0 [('negative regulation of transcription from RNA polymerase II promoter by glucose', '5.39e-06'), ('protein targeting to vacuole', '2.66e-04'), ('ubiquitin-dependent protein catabolic process via the multivesicular body sorting pathway', '3.77e-05')]	1.0 [('ESCRT II complex', '1.08e-06')]	1.0 []
1345	Septin complex	SEP11 (Q9NVA2), SEPT2 (Q15019), SEPT7 (Q16181), SEPT8 (Q92599), SEPT9 (Q9UHD8)	5	CDC11 (P32458), CDC12 (P32468), CDC3 (P32457), SHS1 (Q07657), SPR28 (Q04921)	5	0	1.0 [('CELL CYCLE', '8.84e-09')]	1.0 [('SEPTIN COMPLEX', '2.47e-15')]	1.0 [('GTP BINDING', '6.80e-09'), ('structural constituent of cytoskeleton', '1.43e-10')]
387	MCM complex	MCM2 (P49736), MCM3 (P25205), MCM4 (P33991), MCM5 (P33992), MCM6 (Q14566), MCM7 (P33993)	6	CDC47 (P38132), CDC54 (P30665), MCM2 (P29469), MCM3 (P24279), MCM5 (P29496), MCM6 (P53091)	6	0	1.0 [('DNA REPLICATION INITIATION', '9.89e-14'), ('S phase of mitotic cell cycle', '2.20e-15'), ('TRANSCRIPTION', '7.10e-07'), ('pre-replicative complex assembly', '2.20e-15')]	1.0 [('DNA replication preinitiation complex', '1.81e-14'), ('MCM complex', '2.20e-15'), ('cytoplasm', '9.94e-04'), ('pre-replicative complex', '2.20e-15')]	1.0 [('ATP BINDING', '2.45e-05'), ('DNA replication origin binding', '1.26e-13')]
724	MAF2 complex	MO4L1 (Q9UBU8), MYST1 (Q9H7Z6)	2	EAF3 (Q12432), ESA1 (Q08649)	2	0	1.0 [('DNA repair', '1.79e-03'), ('chromatin assembly or disassembly', '4.57e-05'), ('histone acetylation', '3.92e-04'), ('regulation of transcription from RNA polymerase II promoter', '1.28e-03')]	1.0 [('NuA4 histone acetyltransferase complex', '3.92e-05')]	1.0 [('chromatin binding', '4.12e-04')]
906	ADAR1-CDK2 complex	CDK2 (P24941), DSRAD (P55265)	2	CDC28 (P00546), PHO85 (P17157)	2	0	1.0 [('protein amino acid phosphorylation', '3.13e-03')]	1.0 [('cyclin-dependent protein kinase holoenzyme complex', '4.52e-05')]	1.0 [('cyclin-dependent protein kinase activity', '9.05e-06')]
3231	Eps15-stonin2 complex	EPS15 (P42566), STON2 (Q8WXE9)	2	EDE1 (P34216), END3 (P39013)	2	0	1.0 [('endocytosis', '8.40e-04')]	1.0 [('actin cortical patch', '3.66e-04'), ('mating projection tip', '1.45e-03')]	1.0 [('calcium ion binding', '2.47e-04')]
389	ORC complex (origin recognition complex)	ORC1 (Q13415), ORC2 (Q13416), ORC3 (Q9UBD5), ORC4 (O43929), ORC5 (O43913), ORC6 (Q9Y5N6)	6	CDC6 (P09119), ORC1 (P54784), ORC2 (P32833), ORC4 (P54791), ORC5 (P50874)	5	0	1.0 [('pre-replicative complex assembly', '3.53e-13')]	1.0 [('DNA replication preinitiation complex', '2.39e-12'), ('pre-replicative complex', '3.53e-13')]	1.0 [('DNA replication origin binding', '1.15e-11')]
2860	DSIF complex (DRB sensitivity-inducing factor complex)	SPT4H (P63272), SPT5H (O00267)	2	SPT4 (P32914), SPT5 (P27692)	2	0	1.0 [('RNA ELONGATION FROM RNA POLYMERASE II PROMOTER', '7.20e-04'), ('chromatin organization', '1.06e-05'), ('mRNA processing', '4.54e-04')]	1.0 [('DSIF complex', '5.03e-07')]	1.0 [('RNA polymerase I transcription factor activity', '3.32e-05'), ('RNA polymerase II transcription elongation factor activity', '3.92e-05')]
5231	53BP1-containing complex	KU70 (P12956), KU86 (P13010), RFA1 (P27694), RFA2 (P15927), TP53B (Q12888)	5	RFA1 (P22336), RFA2 (P26754)	2	0	1.0 [('DNA unwinding during replication', '6.32e-05'), ('double-strand break repair via homologous recombination', '6.32e-05'), ('establishment of protein localization', '1.15e-05'), ('heteroduplex formation', '3.22e-05'), ('nucleotide-excision repair', '2.41e-04'), ('protein ubiquitination', '8.08e-04'), ('reciprocal meiotic recombination', '6.44e-04'), ('telomere maintenance via recombination',…	1.0 [('DNA replication factor A complex', '3.45e-06'), ('chromosome, telomeric region', '2.91e-04'), ('condensed nuclear chromosome', '1.05e-04')]	1.0 [('double-stranded DNA binding', '1.38e-04'), ('sequence-specific DNA binding', '1.17e-02'), ('single-stranded DNA binding', '1.56e-04')]
559	Decapping complex	DCP1A (Q9NPI6), DCP2 (Q8IU60), DDX6 (P26196), EDC3 (Q96F86), EDC4 (Q6P2E9)	5	DCP2 (P53550), DHH1 (P39517)	2	0	1.0 [('deadenylation-dependent decapping of nuclear-transcribed mRNA', '1.03e-05'), ('mRNA processing', '2.59e-04')]	1.0 [('CYTOPLASMIC MRNA PROCESSING BODY', '6.64e-05')]	1.0 []
3097	TIMM17-TIMM23 complex	TI17A (Q99595), TIM23 (O14925)	2	TIM17 (P39515), TIM23 (P32897)	2	0	1.0 [('protein import into mitochondrial matrix', '4.91e-05')]	1.0 [('MITOCHONDRIAL INNER MEMBRANE PRESEQUENCE TRANSLOCASE COMPLEX', '1.72e-06')]	1.0 [('P-P-BOND-HYDROLYSIS-DRIVEN PROTEIN TRANSMEMBRANE TRANSPORTER ACTIVITY', '1.29e-05')]
5615	Emerin complex 52	1433E (P62258), 1433T (P27348), ACTB (P60709), API5 (Q9BZZ5), C1QBP (Q07021), DDX39 (O00148), EMD (P50402), H11 (Q02539), HDGF (P51858), HNRPK (P61978), HNRPL (P14866), HNRPU (Q00839), ILF3 (Q12906), IQGA1 (P46940), KCRB (P12277), LMNB1 (P20700), LSM8 (O95777), MAN1 (Q9Y2U8), NMI (Q13287), PDCD4 (Q53EL6), RBL2 (Q08999), SMD1 (P62314), THA (P10827)	23	BMH1 (P29311), BMH2 (P34730)	2	0	1.0 [('DNA damage checkpoint', '6.72e-05'), ('Ras protein signal transduction', '7.84e-05'), ('ascospore formation', '1.01e-03'), ('cell wall chitin biosynthetic process', '5.69e-05'), ('glycogen metabolic process', '1.03e-04'), ('negative regulation of ubiquitin-protein ligase activity during mitotic cell cycle', '2.58e-06'), ('pseudohyphal growth', '1.42e-03'), ('signal transduction during fila…	1.0 [('plasma membrane enriched fraction', '3.08e-03')]	1.0 [('DNA replication origin binding', '3.26e-04'), ('protein domain specific binding', '2.58e-06')]
2266	PPP3CA-PPP3CA-RCAN1 complex	PP2BA (Q08209), PP2BB (P16298), RCAN1 (P53805)	3	PP2B1 (P23287), PP2B2 (P14747)	2	0	1.0 [('adaptation to pheromone during conjugation with cellular fusion', '3.79e-05'), ('cellular ion homeostasis', '5.23e-05')]	1.0 [('CALCINEURIN COMPLEX', '1.72e-06')]	1.0 [('CALMODULIN BINDING', '3.79e-05'), ('IRON ION BINDING', '1.96e-03'), ('phosphoprotein phosphatase activity', '2.58e-05')]
1176	CRM1-RAN-PHAX-CBC complex (cap binding complex)	NCBP1 (Q09161), NCBP2 (P52298), PHAX (Q9H814), RAN (P62826), XPO1 (O14980)	5	NCBP1 (P34160), NCBP2 (Q08920)	2	0	1.0 [('mRNA transport', '6.84e-05'), ('nuclear mRNA splicing, via spliceosome', '9.51e-04'), ('nuclear-transcribed mRNA catabolic process, nonsense-mediated decay', '5.28e-05')]	1.0 [('commitment complex', '2.76e-05'), ('nuclear cap binding complex', '5.03e-07'), ('perinuclear region of cytoplasm', '4.57e-05')]	1.0 []
1034	ORC 2-5 complex (origin recognition 2-5 complex)	ORC2 (Q13416), ORC3 (Q9UBD5), ORC4 (O43929), ORC5 (O43913)	4	ORC2 (P32833), ORC4 (P54791), ORC5 (P50874)	3	0	1.0 [('DNA REPLICATION INITIATION', '8.36e-07'), ('chromatin silencing at silent mating-type cassette', '1.71e-06'), ('pre-replicative complex assembly', '1.30e-07')]	1.0 [('DNA replication preinitiation complex', '3.80e-07'), ('nuclear origin of replication recognition complex', '5.72e-09'), ('pre-replicative complex', '1.30e-07')]	1.0 [('DNA REPLICATION ORIGIN BINDING', '9.37e-07')]
112	Prefoldin complex	PFD1 (O60925), PFD2 (Q9UHV9), PFD3 (P61758), PFD4 (Q9NQP4), PFD5 (Q99471), PFD6 (O15212)	6	PFD2 (P40005), PFD3 (P48363), PFD4 (P53900), PFD5 (Q04493), PFD6 (P52553)	5	0	1.0 [('PROTEIN FOLDING', '1.78e-09'), ('tubulin complex assembly', '1.10e-15')]	1.0 [('PREFOLDIN COMPLEX', '3.08e-15')]	1.0 [('UNFOLDED PROTEIN BINDING', '2.20e-09'), ('tubulin binding', '1.10e-15')]
944	Class C Vps complex (VPS11, VPS18, VPS16)	VPS11 (Q9H270), VPS16 (Q9H269), VPS18 (Q9P253)	3	PEP3 (P27801), PEP5 (P12868), VPS16 (Q03308)	3	0	1.0 [('Golgi to endosome transport', '8.18e-08'), ('late endosome to vacuole transport', '3.26e-07'), ('vacuole fusion, non-autophagic', '6.57e-07')]	1.0 [('CORVET complex', '5.72e-09'), ('HOPS complex', '5.72e-09'), ('fungal-type vacuole membrane', '1.93e-05')]	1.0 []
5209	Ubiquilin-proteasome complex	PSA1 (P25786), PSA2 (P25787), PSA6 (P60900), UBE3A (Q05086), UBQL1 (Q9UMX0), UBQL2 (Q9UHD9)	6	PSA1 (P40302), PSA2 (P23639), PSA3 (P21242), PSA4 (P23638), PSA6 (P21243), PSA7 (P40303)	6	0	1.0 [('ubiquitin-dependent protein catabolic process', '2.61e-11')]	1.0 [('NUCLEUS', '2.30e-04'), ('proteasome core complex, alpha-subunit complex', '1.10e-15'), ('proteasome storage granule', '9.06e-15')]	1.0 [('threonine-type endopeptidase activity', '1.10e-15')]
2307	AP3D1-AP3S2 complex	AP3D1 (O14617), AP3S2 (P59780)	2	AP3D (Q08951), AP3S (P47064)	2	0	1.0 [('Golgi to vacuole transport', '1.51e-04'), ('INTRACELLULAR PROTEIN TRANSPORT', '8.90e-04')]	1.0 [('GOLGI APPARATUS', '1.88e-03'), ('MEMBRANE COAT', '7.54e-06'), ('cytoplasmic vesicle', '7.69e-05')]	1.0 [('PROTEIN TRANSPORTER ACTIVITY', '1.63e-04')]
2308	AP3D1-AP3S1 complex	AP3D1 (O14617), AP3S1 (Q92572)	2	AP3D (Q08951), AP3S (P47064)	2	0	1.0 [('Golgi to vacuole transport', '1.51e-04'), ('INTRACELLULAR PROTEIN TRANSPORT', '8.90e-04')]	1.0 [('GOLGI APPARATUS', '1.88e-03'), ('cytoplasmic vesicle', '7.69e-05'), ('membrane coat', '7.54e-06')]	1.0 [('PROTEIN TRANSPORTER ACTIVITY', '1.63e-04')]
4498	p32-CBF-DNA complex	C1QBP (Q07021), NFYA (P23511), NFYB (P25208), NFYC (Q13952)	4	HAP2 (P06774), HAP3 (P13434), HAP5 (Q02516)	3	0	1.0 [('regulation of carbohydrate metabolic process', '7.14e-09'), ('transcription', '1.35e-03')]	1.0 [('CCAAT-BINDING FACTOR COMPLEX', '8.17e-10')]	1.0 [('transcription activator activity', '2.90e-06')]
1211	Ubiquitin E3 ligase (AHR, ARNT, DDB1, TBL3, CUL4B, RBX1)	AHR (P35869), ARNT (P27540), CUL4B (Q13620), DDB1 (Q16531), RBX1 (P62877), TBL3 (Q12788)	6	UTP12 (Q12220), UTP13 (Q05946)	2	0	1.0 [("endonucleolytic cleavage in 5'-ETS of tricistronic rRNA transcript (SSU-rRNA, 5.8S rRNA, LSU-rRNA)", '1.63e-04'), ('endonucleolytic cleavage in ITS1 to separate SSU-rRNA from 5.8S rRNA and LSU-rRNA from tricistronic rRNA transcript (SSU-rRNA, 5.8S rRNA, LSU-rRNA)', '3.35e-04'), ("endonucleolytic cleavage to generate mature 5'-end of SSU-rRNA from (SSU-rRNA, 5.8S rRNA, LSU-rRNA)", '1.90e-04…	1.0 [('Pwp2p-containing subcomplex of 90S preribosome', '7.54e-06'), ('small-subunit processome', '4.98e-04')]	1.0 [('snoRNA binding', '6.03e-05')]
915	SNARE complex (SNAP23, STX1A)	SNP23 (O00161), STX1A (Q16623)	2	SSO1 (P32867), SSO2 (P39926)	2	0	1.0 [('Golgi to plasma membrane transport', '1.94e-04'), ('ascospore-type prospore formation', '9.69e-06'), ('intracellular protein transport', '1.14e-03')]	1.0 [('plasma membrane', '1.92e-02'), ('plasma membrane enriched fraction', '2.31e-03'), ('prospore membrane', '2.10e-04')]	1.0 [('SNAP receptor activity', '1.78e-04'), ('phosphatidic acid binding', '3.88e-06')]
274	RAD17-RFC-9-1-1 checkpoint supercomplex	HUS1 (O60921), RAD1 (O60671), RAD17 (O75943), RAD9A (Q99638), RFC2 (P35250), RFC3 (P40938), RFC4 (P35249), RFC5 (P40937)	8	RFC1 (P38630), RFC2 (P40348), RFC3 (P38629), RFC4 (P40339), RFC5 (P38251), rad24 (P32641)	6	1	0.83 [('leading strand elongation', '1.76e-12'), ('mismatch repair', '1.02e-11')]	1.0 [('nucleus', '2.30e-04')]	1.0 [('ATP binding', '1.22e-05')]
2757	SMN complex, U7 snRNA specific	LSM10 (Q969L4), LSM11 (P83369), RSMB (P14678), RUXE (P62304), RUXF (P62306), RUXG (P62308), SMD3 (P62318)	7	RSMB (P40018), RUXE (Q12330), RUXF (P54999), RUXG (P40204), SMD3 (P43321)	5	0	1.0 [('nuclear mRNA splicing, via spliceosome', '9.50e-10')]	1.0 [('U1 snRNP', '9.08e-13'), ('U4/U6 x U5 tri-snRNP complex', '1.44e-11'), ('U5 snRNP', '4.41e-13')]	0.8 [('RNA BINDING', '1.36e-04')]
1037	TFIIH transcription factor core complex	ERCC3 (P19447), TF2H1 (P32780), TF2H2 (Q13888), TF2H3 (Q13889), TF2H4 (Q92759)	5	RAD25 (Q00578), SSL1 (Q04673), TFB1 (P32776), TFB2 (Q02939), TFB4 (Q12004)	5	0	1.0 [('TRANSCRIPTION INITIATION FROM RNA POLYMERASE II PROMOTER', '1.13e-10')]	1.0 [('SSL2-core TFIIH complex portion of NEF3 complex', '8.80e-16'), ('SSL2-core TFIIH complex portion of holo TFIIH complex', '8.80e-16')]	0.8 [('general RNA polymerase II transcription factor activity', '5.07e-08')]
553	RHOA-IP3R-TRPC1 complex	ITPR1 (Q14643), RHOA (P61586), TRPC1 (P48995)	3	RHO1 (P06780), rho2 (P06781), rho3 (Q00245), rho4 (Q00246)	4	3	1.0 [('actin filament organization', '2.04e-08'), ('establishment of cell polarity', '1.46e-08'), ('small GTPase mediated signal transduction', '3.36e-08')]	0.75 [('intracellular', '6.45e-06'), ('plasma membrane', '3.02e-03')]	1.0 [('GTP binding', '7.89e-07'), ('GTPase activity', '1.13e-07'), ('signal transducer activity', '3.13e-09')]
815	MRIP-MBS-RHOA complex	MPRIP (Q6WCQ1), MYPT1 (O14974), RHOA (P61586)	3	RHO1 (P06780), rho2 (P06781), rho3 (Q00245), rho4 (Q00246)	4	3	1.0 [('actin filament organization', '2.04e-08'), ('establishment of cell polarity', '1.46e-08'), ('small GTPase mediated signal transduction', '3.36e-08')]	0.75 [('intracellular', '6.45e-06'), ('plasma membrane', '3.02e-03')]	1.0 [('GTP binding', '7.89e-07'), ('GTPase activity', '1.13e-07'), ('signal transducer activity', '3.13e-09')]
2931	SHARP-CtBP1-CtIP-RBP-Jkappa corepressor complex	CTBP1 (Q13363), MINT (Q96T58), RBBP8 (Q99708), SUH (Q06330)	4	SER33 (P40510), SERA (P40054), fdh1 (Q08911), fdh2 (Q08987)	4	2	1.0 [('oxidation reduction', '7.17e-06')]	0.75 []	1.0 [('NAD or NADH binding', '5.56e-10')]
1171	c-MYC-ATPase-helicase complex	ACL6A (O96019), MYC (P01106), RUVB1 (Q9Y265), RUVB2 (Q9Y230), TRRAP (Q9Y4A5)	5	ARP4 (P80428), RUVB1 (Q03940), RUVB2 (Q12464), TRA1 (P38811)	4	0	1.0 [('DNA repair', '4.39e-07'), ('TRANSCRIPTION', '1.21e-04'), ('regulation of transcription from RNA polymerase II promoter', '2.23e-07')]	0.75 [('ASTRA complex', '4.00e-08'), ('Ino80 complex', '2.51e-07'), ('Swr1 complex', '3.26e-07')]	1.0 []
1142	SMN complex	DDX20 (Q9UHI6), GEMI2 (O14893), RSMB (P14678), RUXE (P62304), RUXF (P62306), RUXG (P62308), SMD1 (P62314), SMD2 (P62316), SMD3 (P62318), SMN (Q16637)	10	RSMB (P40018), RUXE (Q12330), RUXF (P54999), RUXG (P40204), SMD1 (Q02260), SMD2 (Q06217), SMD3 (P43321)	7	0	1.0 [('nuclear mRNA splicing, via spliceosome', '1.09e-13')]	1.0 [('U1 snRNP', '1.10e-15'), ('U4/U6 x U5 tri-snRNP complex', '1.10e-15'), ('U5 snRNP', '1.10e-15')]	0.71 [('RNA binding', '2.65e-05')]
5342	ELMO1-DOCK1-RAC1 complex	DOCK1 (Q14185), ELMO1 (Q92556), RAC1 (P63000)	3	RHO5 (P53879), cdc42 (P19073), rho1 (P06780), rho2 (P06781), rho3 (Q00245), rho4 (Q00246)	6	5	0.83 [('SMALL GTPASE MEDIATED SIGNAL TRANSDUCTION', '9.50e-10'), ('establishment of cell polarity', '3.30e-10')]	0.83 [('plasma membrane', '5.86e-06')]	1.0 [('GTP binding', '1.45e-10'), ('GTPase activity', '7.52e-12')]
4403	EIF3 complex (EIF3A, EIF3B, EIF3G, EIF3I, EIF3J)	EIF3A (Q14152), EIF3B (P55884), EIF3G (O75821), EIF3I (Q13347), EIF3J (O75822)	5	EIF3A (P38249), EIF3B (P06103), EIF3G (Q04067), EIF3I (P40217), EIF3J (Q05775), eif2a (P53235)	6	1	0.83 [('TRANSLATIONAL INITIATION', '1.25e-10')]	0.83 [('EUKARYOTIC TRANSLATION INITIATION FACTOR 3 COMPLEX', '1.11e-14')]	1.0 [('TRANSLATION INITIATION FACTOR ACTIVITY', '1.95e-13')]
302	INO80 chromatin remodeling complex	ACL6A (O96019), ARP5 (Q9H9F9), ARP8 (Q9H981), IN80B (Q9C086), IN80C (Q6PI98), IN80D (Q53TQ3), IN80E (Q8NBZ0), INO80 (Q9ULG1), MCRS1 (Q96EZ8), NFRKB (Q6P4R8), RUVB1 (Q9Y265), RUVB2 (Q9Y230), TFE2 (P15923)	13	ARP4 (P80428), ARP5 (P53946), ARP8 (Q12386), INO80 (P53115), RUVB1 (Q03940), RUVB2 (Q12464)	6	0	0.83 [('chromatin remodeling', '6.90e-11'), ('transcription', '2.53e-05')]	1.0 [('Ino80 complex', '8.80e-16')]	0.83 []
655	HSF1-HSF2 complex	HSF1 (Q00613), HSF2 (Q03933)	2	SFL1 (P20134), hsf (P10961), skn7 (P38889)	3	2	1.0 [('transcription', '1.08e-03')]	0.67 []	1.0 [('TRANSCRIPTION FACTOR ACTIVITY', '5.06e-05'), ('sequence-specific DNA binding', '7.79e-05')]
5241	SMC1-SMC3 complex	SMC1A (Q14683), SMC3 (Q9UQE7)	2	SMC1 (P32908), SMC3 (P47037), smc4 (Q12267)	3	1	1.0 [('CELL DIVISION', '1.16e-04')]	0.67 [('nuclear mitotic cohesin complex', '5.17e-06')]	1.0 [('ATP binding', '6.30e-03')]
2416	ITGB1-RAP1A-PKD1 complex	ITB1 (P05556), PKD1 (P98161), RAP1A (P62834)	3	RAS1 (P01119), RAS2 (P01120), rsr1 (P13856)	3	1	0.67 [('Ras protein signal transduction', '1.17e-04'), ('replicative cell aging', '7.22e-04')]	1.0 [('intracellular', '1.22e-06'), ('plasma membrane', '5.86e-04')]	1.0 [('GTP binding', '3.39e-05'), ('GTPase activity', '7.96e-06')]
605	TIM (TIMM17ab, TIMM23, TIMM44) complex, mitochondrial	TI17A (Q99595), TI17B (O60830), TIM23 (O14925), TIM44 (O43615)	4	TIM17 (P39515), TIM23 (P32897), tim44 (Q01852)	3	1	1.0 [('protein import into mitochondrial matrix', '1.58e-07')]	0.67 [('MITOCHONDRIAL INNER MEMBRANE PRESEQUENCE TRANSLOCASE COMPLEX', '5.17e-06')]	1.0 [('P-P-BOND-HYDROLYSIS-DRIVEN PROTEIN TRANSMEMBRANE TRANSPORTER ACTIVITY', '1.96e-08')]
1083	P-TEFb.4 complex	CCNK (O75909), CDK9 (P50750)	2	CTK1 (Q03957), CTK2 (P46962), ssn8 (P47821)	3	1	1.0 [('transcription', '1.35e-03')]	0.67 [('carboxy-terminal domain protein kinase complex', '3.23e-06'), ('nucleolus', '1.71e-02'), ('nucleoplasm', '4.99e-04')]	1.0 []
2256	RIAM-Rap1-GTP complex	AB1IP (Q7Z5R6), RAP1A (P62834)	2	RAS1 (P01119), RAS2 (P01120), rsr1 (P13856)	3	1	0.67 [('Ras protein signal transduction', '1.17e-04'), ('replicative cell aging', '7.22e-04')]	1.0 [('intracellular', '1.22e-06'), ('plasma membrane', '5.86e-04')]	1.0 [('GTP binding', '3.39e-05'), ('GTPase activity', '7.96e-06')]
5251	Ku-ORC complex	KU70 (P12956), KU86 (P13010), ORC2 (Q13416), ORC3 (Q9UBD5), ORC4 (O43929), ORC6 (Q9Y5N6)	6	ORC2 (P32833), ORC4 (P54791), ku70 (P32807)	3	1	1.0 [('chromatin silencing at silent mating-type cassette', '1.22e-06')]	0.67 [('DNA replication preinitiation complex', '2.26e-04'), ('nuclear origin of replication recognition complex', '1.61e-05'), ('pre-replicative complex', '1.13e-04')]	1.0 []
4200	DLP1-hFIS1 complex	DNM1L (O00429), FIS1 (Q9Y3D6)	2	DNM1 (P54861), VPS1 (P21576), fis1 (P40515)	3	1	1.0 [('peroxisome organization', '1.11e-07')]	1.0 [('mitochondrial outer membrane', '1.02e-05'), ('peroxisome', '8.95e-07')]	0.67 [('GTP binding', '5.70e-03'), ('GTPase activity', '2.20e-03'), ('motor activity', '5.81e-05')]
478	STAGA core complex (SPT3-TAF9-GCN5 acetyltransferase complex)	GCNL2 (Q92830), SUPT3 (O75486), TAF9 (Q16594)	3	GCN5 (Q03330), SPT3 (P06844), TAF9 (Q05027)	3	0	1.0 [('histone acetylation', '1.61e-06')]	1.0 [('SAGA complex', '1.86e-07'), ('SLIK (SAGA-like) complex', '1.11e-07')]	0.67 [('DNA binding', '1.79e-02')]
1734	SF3A1-SF3A2-SF3A3 complex	SF3A1 (Q15459), SF3A2 (Q15428), SF3A3 (Q12874)	3	PRP11 (Q07350), PRP21 (P32524), PRP9 (P19736)	3	0	0.67 [('nuclear mRNA splicing, via spliceosome', '2.02e-03')]	1.0 [('SPLICEOSOMAL COMPLEX', '6.30e-06'), ('U2 snRNP', '7.43e-08')]	1.0 [('RNA binding', '5.84e-04')]
656	VPS35-VPS29-VPS26A complex	VP26A (O75436), VPS29 (Q9UBQ0), VPS35 (Q96QK1)	3	PEP11 (P38759), VPS26 (P40335), VPS35 (P34110)	3	0	1.0 [('PROTEIN TRANSPORT', '1.64e-04'), ('retrograde transport, endosome to Golgi', '1.39e-07')]	1.0 [('ENDOSOME', '8.92e-06'), ('retromer complex, inner shell', '2.04e-10')]	0.67 []
3008	60S APC containing complex	APC (P25054), IQGA1 (P46940), TBA1A (Q71U36), TBA1B (P68363), TBA1C (Q9BQE3), TBG1 (P23258), TBG2 (Q9NRH3)	7	TBA1 (P09733), TBA3 (P09734), TBG (P53378)	3	0	1.0 [('PROTEIN POLYMERIZATION', '4.49e-09')]	0.67 [('PROTEIN COMPLEX', '4.97e-05'), ('cytoplasmic microtubule', '1.85e-04'), ('kinetochore microtubule', '4.97e-05'), ('nuclear microtubule', '4.97e-05'), ('polar microtubule', '7.11e-06'), ('spindle pole body', '2.77e-03')]	1.0 [('GTP BINDING', '6.22e-05'), ('GTPASE ACTIVITY', '1.46e-05'), ('structural constituent of cytoskeleton', '6.37e-06')]
243	RalBP1-CDC2-CCNB1 complex	CCNB1 (P14635), CDC2 (P06493), RBP1 (Q15311)	3	CDC28 (P00546), CG21 (P24868), CG22 (P24869), CG23 (P24870), CG24 (P24871), CGS5 (P30283), CGS6 (P32943), kin28 (P06242)	8	1	1.0 [('CELL DIVISION', '2.10e-12')]	0.88 [('nucleus', '1.74e-04')]	0.75 []
2921	SHARP-CtBP complex	CTBP1 (Q13363), CTBP2 (P56545), MINT (Q96T58)	3	SER33 (P40510), SERA (P40054), fdh1 (Q08911), fdh2 (Q08987), yn14 (P53839)	5	3	1.0 [('OXIDATION REDUCTION', '2.79e-07')]	0.6 []	1.0 [('NAD OR NADH BINDING', '1.79e-12')]
1144	Cleavage and polyadenylation factor (CPSF)	CPSF1 (Q10570), CPSF2 (Q9P2I0), CPSF3 (Q9UKF6), CPSF4 (O95639), FIP1 (Q6UN15)	5	CFT1 (Q06632), CFT2 (Q12102), FIP1 (P45976), YSH1 (Q06224), YTH1 (Q06102)	5	0	1.0 [('mRNA cleavage', '4.99e-12'), ('mRNA polyadenylation', '1.01e-12')]	1.0 [('mRNA cleavage and polyadenylation specificity factor complex', '3.53e-13')]	0.6 [('RNA BINDING', '4.34e-03')]
1413	NCOR1 complex	HDAC3 (O15379), NCOR1 (O75376), SF3A1 (Q15459), SF3B3 (Q15393), SMCA4 (P51532), SMRC1 (Q92922), SMRC2 (Q8TAQ2), SNF5 (Q12824), SRCAP (Q6ZRS2), TIF1B (Q13263)	10	RSC8 (P43609), SFH1 (Q06168), SNF2 (P22082), STH1 (P32597), SWI3 (P32591)	5	0	1.0 [('ATP-dependent chromatin remodeling', '1.79e-12')]	0.6 [('RSC complex', '8.30e-07')]	1.0 []
5380	TRBP containing complex (DICER, RPL7A, EIF6, MOV10 and subunits of the 60S ribosomal particle)	DICER (Q9UPY3), IF6 (P56537), MOV10 (Q9HCE1), RL10A (P62906), RL11 (P62913), RL12 (P30050), RL13 (P26373), RL14 (P50914), RL15 (P61313), RL18A (Q02543), RL19 (P84098), RL21 (P46778), RL27 (P61353), RL28 (P46779), RL30 (P62888), RL32 (P62910), RL34 (P49207), RL35A (P18077), RL36 (Q9Y3U8), RL37A (P61513), RL7 (P18124), RL7A (P62424), RLA1 (P05386), RLA2 (P05387), RLP24 (Q9UHA3)	25	RL20 (P0C2I0), RL36A (P05745), RL36B (O14455), RLA1 (P05318), RLA2 (P05319), RLA3 (P10622), RLA4 (P02400)	7	0	0.57 [('TRANSLATIONAL ELONGATION', '3.24e-09')]	1.0 [('CYTOSOLIC LARGE RIBOSOMAL SUBUNIT', '1.44e-13')]	1.0 [('STRUCTURAL CONSTITUENT OF RIBOSOME', '2.36e-10')]
561	LSm1-7 complex	LSM1 (O15116), LSM2 (Q9Y333), LSM3 (P62310), LSM4 (Q9Y4Z0), LSM5 (Q9Y4Y9), LSM6 (P62312), LSM7 (Q9UK45)	7	LSM1 (P47017), LSM2 (P38203), LSM3 (P57743), LSM4 (P40070), LSM5 (P40089), LSM6 (Q06406), LSM7 (P53905)	7	0	0.86 [('mRNA catabolic process', '1.98e-15'), ('nuclear mRNA splicing, via spliceosome', '1.28e-10'), ('rRNA processing', '1.48e-09'), ('tRNA processing', '8.14e-14')]	0.86 [('U4/U6 x U5 tri-snRNP complex', '7.90e-13'), ('U6 snRNP', '1.98e-15'), ('nucleolus', '9.18e-08'), ('small nucleolar ribonucleoprotein complex', '1.98e-15')]	0.86 [('RNA binding', '7.98e-07')]
5546	CDC2-PCNA-CCNB1-GADD45G complex	CCNB1 (P14635), CDC2 (P06493), GA45G (O95257), PCNA (P12004)	4	CDC28 (P00546), CG21 (P24868), CG22 (P24869), CG23 (P24870), CG24 (P24871), CGS5 (P30283), CGS6 (P32943), kin28 (P06242), pcna (P15873)	9	2	0.89 [('CELL DIVISION', '1.84e-11')]	0.89 [('nucleus', '3.68e-05')]	0.78 []
310	Cell cycle kinase complex CDC2	CCNB1 (P14635), CCNB2 (O95067), CCND1 (P24385), CDC2 (P06493), CDN1A (P38936), PCNA (P12004)	6	CDC28 (P00546), CG21 (P24868), CG22 (P24869), CG23 (P24870), CG24 (P24871), CGS5 (P30283), CGS6 (P32943), kin28 (P06242), pcna (P15873)	9	2	0.89 [('CELL DIVISION', '1.84e-11')]	0.89 [('nucleus', '3.68e-05')]	0.78 []
181	26S proteasome	PRS10 (P62333), PRS4 (P62191), PRS6A (P17980), PRS6B (P43686), PRS7 (P35998), PRS8 (P62195), PSA1 (P25786), PSA2 (P25787), PSA3 (P25788), PSA4 (P25789), PSA5 (P28066), PSA6 (P60900), PSA7 (O14818), PSB1 (P20618), PSB2 (P49721), PSB3 (P49720), PSB4 (P28070), PSB5 (P28074), PSB6 (P28072), PSB7 (Q99436), PSD13 (Q9UNM6), PSMD4 (P55036)	22	PRS10 (P53549), PRS4 (P40327), PRS6A (P33297), PRS6B (P33298), PRS7 (P33299), PRS8 (Q01939), PSA1 (P40302), PSA2 (P23639), PSA3 (P21242), PSA4 (P23638), PSA6 (P21243), PSA7 (P40303), PSB1 (P23724), PSB2 (P22141), PSB3 (P25451), PSB4 (P30657), PSB5 (P30656), PSB6 (P38624), RPN10 (P38886), RPN9 (Q04062), psa5 (P32379), psb7 (P25043)	22	2	1.0 [('ubiquitin-dependent protein catabolic process', '8.80e-16')]	0.91 [('nucleus', '1.94e-12')]	0.64 [('THREONINE-TYPE ENDOPEPTIDASE ACTIVITY', '8.80e-16')]
432	N-NOS-CHIP-HSP70-1 complex	HSP71 (P08107), NOS1 (P29475), STUB1 (Q9UNE7)	3	HSP71 (P10591), HSP76 (P40150), hsp72 (P10592), hsp74 (P22202)	4	2	0.75 [('SRP-dependent cotranslational protein targeting to membrane, translocation', '5.48e-08')]	0.75 [('plasma membrane enriched fraction', '6.38e-05')]	1.0 [('ATP binding', '7.31e-04'), ('unfolded protein binding', '1.35e-07')]
2217	MDC1-MRN-ATM-FANCD2 complex	ATM (Q13315), FACD2 (Q9BXW9), MDC1 (Q14676), MRE11 (P49959), NBN (O60934), RAD50 (Q92878)	6	MRE11 (P32829), RAD50 (P12753), atm (P38110), atr (P38111)	4	2	0.5 [('DNA damage induced protein phosphorylation', '3.88e-06'), ('double-strand break repair via break-induced replication', '1.08e-04'), ('double-strand break repair via nonhomologous end joining', '1.25e-03'), ('histone phosphorylation', '3.88e-06'), ('meiotic DNA double-strand break formation', '2.33e-05'), ('meiotic DNA double-strand break processing', '1.16e-05'), ('telomere maintenance via…	1.0 [('mitochondrion', '8.59e-04')]	1.0 []
3129	STAT6-p100-RHA complex	DHX9 (Q08211), SND1 (Q7KZF4), STAT6 (P42226)	3	DHR1 (Q04217), yl419 (Q06698)	2	1	0.5 []	1.0 []	1.0 [('ATP-dependent helicase activity', '6.64e-05')]
1729	TLE1 corepressor complex (MASH1 promoter-corepressor complex)	ACTB (P60709), HSP74 (P34932), MYH10 (P35580), NONO (Q15233), NPM (P06748), NUCL (P19338), PARP1 (P09874), RAD50 (Q92878), TLE1 (Q04724), TOP2B (Q02880)	10	TOP2 (P06786), q8tg44 (Q8TG44)	2	1	1.0 [('DNA topological change', '6.46e-06')]	0.5 [('synaptonemal complex', '4.55e-03')]	1.0 [('DNA topoisomerase (ATP-hydrolyzing) activity', '1.29e-06')]
3618	GammaH2AFX-NDHII-Ku70-DNA complex	DHX9 (Q08211), H2AX (P16104), KU70 (P12956)	3	DHR1 (Q04217), yl419 (Q06698)	2	1	0.5 []	1.0 []	1.0 [('ATP-dependent helicase activity', '6.64e-05')]
4399	EIF3 complex (EIF3B, EIF3J, EIF3I)	EIF3B (P55884), EIF3I (Q13347), EIF3J (O75822)	3	EIF3B (P06103), EIF3I (P40217), EIF3J (Q05775), eif2a (P53235)	4	1	0.75 [('TRANSLATIONAL INITIATION', '2.66e-06')]	0.75 [('EUKARYOTIC TRANSLATION INITIATION FACTOR 3 COMPLEX', '1.71e-08')]	1.0 [('TRANSLATION INITIATION FACTOR ACTIVITY', '5.47e-09')]
164	Cohesin-SA1 complex	RAD21 (O60216), SMC1A (Q14683), SMC3 (Q9UQE7), STAG1 (Q8WVM7)	4	SCC3 (P40541), SMC1 (P32908), SMC3 (P47037), smc4 (Q12267)	4	1	1.0 [('CELL DIVISION', '3.51e-06')]	0.75 [('nuclear mitotic cohesin complex', '2.61e-09')]	0.75 [('ATP binding', '2.30e-02')]
304	SRCAP-associated chromatin remodeling complex	ACL6A (O96019), ARP6 (Q9GZN1), EAF2 (Q96CJ1), H2AZ (P0C0S5), RUVB1 (Q9Y265), RUVB2 (Q9Y230), SRCAP (Q6ZRS2), VPS72 (Q15906), YETS4 (O95619), ZNHI1 (O43257)	10	AF9 (P53930), ARP4 (P80428), ARP6 (Q12509), INO80 (P53115), RUVB1 (Q03940), RUVB2 (Q12464), SWR1 (Q05471), h2az (Q12692)	8	1	0.88 [('TRANSCRIPTION', '1.03e-07')]	0.75 [('Swr1 complex', '4.80e-15')]	0.88 []
5843	AIF-CYPA-DNA complex	AIFM1 (O95831), PPIA (P62937)	2	CYPC (P25719), CYPH (P14832)	2	0	1.0 [('protein folding', '8.67e-04')]	0.5 [('Set3 complex', '1.33e-02')]	1.0 [('peptidyl-prolyl cis-trans isomerase activity', '4.31e-05')]
917	CERF complex (CECR2-containing remodeling factor complex)	CECR2 (Q9BXF3), SMCA1 (P28370)	2	ISW1 (P38144), ISW2 (Q08773)	2	0	1.0 [('ATP-DEPENDENT CHROMATIN REMODELING', '1.21e-04'), ('nucleosome positioning', '5.74e-06')]	0.5 [('ISW1 complex', '1.21e-02'), ('chromatin accessibility complex', '1.21e-02')]	1.0 [('helicase activity', '9.82e-05'), ('nucleosome binding', '5.74e-06')]
2213	BRCA1-BARD1-POLR2A complex	BARD1 (Q99728), BRCA1 (P38398), RPB1 (P24928)	3	RPA1 (P10964), RPC1 (P04051)	2	0	1.0 []	0.5 []	1.0 [('DNA binding', '1.22e-02'), ('DNA-directed RNA polymerase activity', '2.85e-04'), ('magnesium ion binding', '6.68e-03')]
1890	ELK1-SRF-ELK4 complex	ELK1 (P19419), ELK4 (P28324), SRF (P11831)	3	ARGR1 (P07249), MCM1 (P11746)	2	0	1.0 [('transcription', '1.67e-02')]	0.5 []	1.0 [('TRANSCRIPTION FACTOR ACTIVITY', '2.19e-03')]
2242	TGM2-HD-CALM1 complex	CALM (P62158), HD (P42858), TGM2 (P21980)	3	CALM (P06787), MLC1 (P53141)	2	0	0.5 [('cytokinesis, contractile ring formation', '1.71e-02'), ('phosphatidylinositol biosynthetic process', '1.71e-02'), ('receptor-mediated endocytosis', '2.27e-02'), ('spindle pole body organization', '1.71e-02'), ('transcription factor import into nucleus', '1.14e-02'), ('vesicle targeting', '5.68e-03')]	1.0 [('cellular bud neck', '7.31e-03'), ('cellular bud tip', '2.45e-03')]	1.0 [('calcium ion binding', '9.27e-04')]
923	SNF2L-RSF1 complex	RSF1 (Q96T23), SMCA1 (P28370)	2	ISW1 (P38144), ISW2 (Q08773)	2	0	1.0 [('ATP-DEPENDENT CHROMATIN REMODELING', '1.21e-04'), ('NUCLEOSOME POSITIONING', '5.74e-06')]	0.5 [('ISW1 complex', '1.21e-02'), ('chromatin accessibility complex', '1.21e-02')]	1.0 [('NUCLEOSOME BINDING', '5.74e-06'), ('helicase activity', '9.82e-05')]
5234	IKBKB-CDC37-KIAA1967-HSP90AB1-HSP90AA1 complex	CDC37 (Q16543), HS90A (P07900), HS90B (P08238), IKKB (O14920), K1967 (Q8N163)	5	HSC82 (P15108), HSP82 (P02829)	2	0	1.0 [('proteasome assembly', '3.92e-05')]	0.5 []	1.0 [('UNFOLDED PROTEIN BINDING', '1.13e-03')]
921	Remodeling and spacing factor (RSF) complex	RSF1 (Q96T23), SMCA5 (O60264)	2	ISW1 (P38144), ISW2 (Q08773)	2	0	1.0 [('ATP-dependent chromatin remodeling', '1.21e-04'), ('NUCLEOSOME POSITIONING', '5.74e-06')]	0.5 [('ISW1 complex', '1.21e-02'), ('chromatin accessibility complex', '1.21e-02')]	1.0 [('NUCLEOSOME BINDING', '5.74e-06'), ('helicase activity', '9.82e-05')]
5363	Actin-ribonucleoprotein complex (POLR2A, GTF2F1, HNRNPU)	HNRPU (Q00839), RPB1 (P24928), T2FA (P35269)	3	RPA1 (P10964), RPC1 (P04051)	2	0	1.0 []	0.5 []	1.0 [('DNA BINDING', '1.22e-02'), ('DNA-directed RNA polymerase activity', '2.85e-04'), ('magnesium ion binding', '6.68e-03')]
1168	SKI complex	SKIV2 (Q15477), TTC37 (Q6PGP7), WDR61 (Q9GZS3)	3	SKI2 (P35207), SKI3 (P17883)	2	0	1.0 [("nuclear-transcribed mRNA catabolic process, 3'-5' exonucleolytic nonsense-mediated decay", '9.77e-05'), ('nuclear-transcribed mRNA catabolic process, non-stop decay', '1.82e-04'), ('response to virus', '4.31e-06')]	1.0 [('Ski complex', '2.15e-06')]	0.5 []
1745	SMN complex	DDX20 (Q9UHI6), GEMI2 (O14893), GEMI4 (P57678), GEMI5 (Q8TEQ6), GEMI6 (Q8WXD5), GEMI7 (Q9H840), RSMB (P14678), RSMN (P63162), RUXE (P62304), RUXF (P62306), RUXG (P62308), SMD1 (P62314), SMD2 (P62316), SMD3 (P62318), SNRPA (P09012)	15	MSL1 (P40567), RSMB (P40018), RUXE (Q12330), RUXF (P54999), RUXG (P40204), SMD1 (Q02260), SMD2 (Q06217), SMD3 (P43321)	8	0	1.0 [('nuclear mRNA splicing, via spliceosome', '1.14e-15')]	0.88 [('U1 snRNP', '1.10e-15'), ('U4/U6 x U5 tri-snRNP complex', '2.09e-15'), ('U5 snRNP', '1.10e-15')]	0.63 [('RNA binding', '6.79e-05')]
2638	HES1 promoter corepressor complex	CBP (Q92793), CDK7 (P50613), EP300 (Q09472), RPB1 (P24928), SPT6H (Q7KZ85), SUH (Q06330)	6	RPA1 (P10964), RPC1 (P04051)	2	0	1.0 []	0.5 []	1.0 [('DNA binding', '1.22e-02'), ('DNA-directed RNA polymerase activity', '2.85e-04'), ('magnesium ion binding', '6.68e-03')]
5212	Kinase maturation complex 2	AZI2 (Q9H6S1), CDC37 (Q16543), HS90A (P07900), HS90B (P08238), TANK (Q92844), TBK1 (Q9UHD2), TBKB1 (A7MCY6), TRAF2 (Q12933)	8	HSC82 (P15108), HSP82 (P02829)	2	0	1.0 [('proteasome assembly', '3.92e-05')]	0.5 []	1.0 [('UNFOLDED PROTEIN BINDING', '1.13e-03')]
5286	TNF-alpha/NF-kappa B signaling complex 10	A16L1 (Q676U5), CCAR1 (Q8IX12), CDC37 (Q16543), HS90A (P07900), HS90B (P08238), IKBB (Q15653), IKKA (O15111), NEMO (Q9Y6K9), TBK1 (Q9UHD2), TXLNA (P40222)	10	HSC82 (P15108), HSP82 (P02829)	2	0	1.0 [('proteasome assembly', '3.92e-05')]	0.5 []	1.0 [('unfolded protein binding', '1.13e-03')]
1812	AXIN-MEKK4-CCD1 complex	AXN1 (O15169), DIXC1 (Q155Q3), M3K4 (Q9Y6R4)	3	SSK2 (P53599), SSK22 (P25390)	2	0	1.0 [('activation of MAPKK activity involved in osmosensory signaling pathway', '5.74e-07'), ('negative regulation of transposition, RNA-mediated', '4.48e-04')]	0.5 []	1.0 [('MAP kinase kinase kinase activity', '3.45e-06')]
2738	BLM complex II	BLM (P54132), RFA1 (P27694), RFA2 (P15927), RFA3 (P35244), RMI1 (Q9H9A7), TOP3A (Q13472)	6	RFA1 (P22336), RFA2 (P26754), SGS1 (P35187), TOP3 (P13099)	4	0	1.0 [('DNA unwinding during replication', '6.13e-11')]	0.5 [('DNA REPLICATION FACTOR A COMPLEX', '7.75e-06'), ('RecQ helicase-Topo III complex', '7.75e-06'), ('chromosome, telomeric region', '6.50e-04'), ('condensed nuclear chromosome', '2.35e-04')]	1.0 []
5694	Nucleolar remodeling complex (NoRC complex)	BAZ2A (Q9UIF9), SMCA5 (O60264)	2	ISW1 (P38144), ISW2 (Q08773)	2	0	1.0 [('ATP-DEPENDENT CHROMATIN REMODELING', '1.21e-04'), ('NUCLEOSOME POSITIONING', '5.74e-06')]	0.5 [('ISW1 complex', '1.21e-02'), ('chromatin accessibility complex', '1.21e-02')]	1.0 [('helicase activity', '9.82e-05'), ('nucleosome binding', '5.74e-06')]
5526	CALM1-FKBP38-BCL2 complex	BCL2 (P10415), CALM (P62158), FKBP8 (Q14318)	3	CALM (P06787), MLC1 (P53141)	2	0	0.5 [('cytokinesis, contractile ring formation', '1.71e-02'), ('phosphatidylinositol biosynthetic process', '1.71e-02'), ('receptor-mediated endocytosis', '2.27e-02'), ('spindle pole body organization', '1.71e-02'), ('transcription factor import into nucleus', '1.14e-02'), ('vesicle targeting', '5.68e-03')]	1.0 [('cellular bud neck', '7.31e-03'), ('cellular bud tip', '2.45e-03')]	1.0 [('calcium ion binding', '9.27e-04')]
3544	COG2-COG3-COG4 subcomplex	COG2 (Q14746), COG3 (Q96JB2), COG4 (Q9H9E3)	3	COG3 (P40094), COG4 (Q06096)	2	0	1.0 [('retrograde transport, vesicle recycling within Golgi', '2.58e-06')]	1.0 [('GOLGI TRANSPORT COMPLEX', '1.21e-05'), ('membrane', '1.61e-03')]	0.5 []
2829	RSmad complex	ARI1B (Q8NFD5), CBP (Q92793), NCOA3 (Q9Y6Q9), SMAD2 (Q15796), SMAD3 (P84022), SMAD4 (Q13485), SMCA4 (P51532), SMRC1 (Q92922), SMRC2 (Q8TAQ2), TRI33 (Q9UPN9)	10	RSC8 (P43609), SNF2 (P22082), STH1 (P32597), SWI3 (P32591)	4	0	1.0 [('ATP-dependent chromatin remodeling', '9.26e-10')]	0.5 [('RSC complex', '2.92e-04'), ('SWI/SNF COMPLEX', '1.42e-04')]	1.0 [('DNA BINDING', '1.15e-05')]
1768	CPSF6-EWSR1-ITCH-NUDT21-POLR2A-UBAP2L complex	CPSF5 (O43809), CPSF6 (Q16630), EWS (Q01844), ITCH (Q96J02), RPB1 (P24928), UBP2L (Q14157)	6	RPA1 (P10964), RPC1 (P04051)	2	0	1.0 []	0.5 []	1.0 [('DNA binding', '1.22e-02'), ('DNA-directed RNA polymerase activity', '2.85e-04'), ('magnesium ion binding', '6.68e-03')]
910	CRSP-Mediator 2 complex	MED14 (O60244), MED15 (Q96RN5), MED16 (Q9Y2X0), MED17 (Q9NVC6), MED18 (Q9BUE0), MED23 (Q9ULK4), MED24 (O75448), MED4 (Q9NPJ6), MED6 (O75586), MED7 (O43513)	10	MED6 (P38782), MED7 (Q08278)	2	0	1.0 [('regulation of transcription from RNA polymerase II promoter', '1.10e-03'), ('transcription from RNA polymerase II promoter', '4.86e-04')]	0.5 [('mediator complex', '1.59e-02')]	1.0 [('RNA POLYMERASE II TRANSCRIPTION MEDIATOR ACTIVITY', '1.09e-04')]
5622	HSP90-CIP1-FKBPL complex	CDN1A (P38936), FKBPL (Q9UIM3), HS90A (P07900)	3	HSC82 (P15108), HSP82 (P02829)	2	0	1.0 [('proteasome assembly', '3.92e-05')]	0.5 []	1.0 [('unfolded protein binding', '1.13e-03')]
2203	BRD4-RFC complex	BRD4 (O60885), RFC1 (P35251), RFC2 (P35250), RFC3 (P40938), RFC4 (P35249), RFC5 (P40937)	6	CTF18 (P49956), RFC1 (P38630), RFC2 (P40348), RFC3 (P38629), RFC4 (P40339), RFC5 (P38251), bdf1 (P35817)	7	1	0.71 [('leading strand elongation', '7.39e-12'), ('mismatch repair', '4.28e-11')]	0.71 [('Ctf18 RFC-like complex', '7.76e-14'), ('DNA REPLICATION FACTOR C COMPLEX', '3.70e-15'), ('nucleus', '2.18e-02')]	1.0 [('protein binding', '2.26e-02')]
57	HDAC4-ERK2 complex	HDAC4 (P56524), MK01 (P28482)	2	FUS3 (P16892), KSS1 (P14681), hog1 (P32485), hos3 (Q02959), kkq1 (P36005), slt2 (Q00772), smk1 (P41808)	7	5	0.86 [('protein amino acid phosphorylation', '2.65e-09')]	0.71 [('nucleus', '1.09e-02')]	0.86 [('ATP binding', '4.64e-05')]
55	HDAC4-ERK1 complex	HDAC4 (P56524), MK03 (P27361)	2	FUS3 (P16892), KSS1 (P14681), hog1 (P32485), hos3 (Q02959), kkq1 (P36005), slt2 (Q00772), smk1 (P41808)	7	5	0.86 [('protein amino acid phosphorylation', '2.65e-09')]	0.71 [('nucleus', '1.09e-02')]	0.86 [('ATP binding', '4.64e-05')]
2715	Ubiquitin E3 ligase (CSN1, CSN8, HRT1, SKP1, SKP2, CUL1, CUL2, CUL3)	CSN1 (Q13098), CSN8 (Q99627), CUL1 (Q13616), CUL2 (Q13617), CUL3 (Q13618), RBX1 (P62877), SKP1 (P63208), SKP2 (Q13309)	8	CDC53 (Q12018), RBX1 (Q08273), SKP1 (P52286), cul3 (P53202), rpn7 (Q06103)	5	2	0.8 [('protein ubiquitination during ubiquitin-dependent protein catabolic process', '1.42e-09')]	1.0 [('nucleus', '7.30e-04')]	0.6 []
159	Condensin I-PARP-1-XRCC1 complex	CND1 (Q15021), CND2 (Q15003), CND3 (Q9BPX3), PARP1 (P09874), SMC2 (O95347), SMC4 (Q9NTJ3), XRCC1 (P18887)	7	CND1 (Q06156), CND2 (P38170), CND3 (Q06680), SMC2 (P38989), SMC4 (Q12267), smc1 (P32908), smc3 (P47037), smc6 (Q12749)	8	3	0.88 [('CELL DIVISION', '5.52e-10')]	0.63 [('nuclear condensin complex', '4.93e-15')]	0.88 []
1097	eIF3 complex (EIF3S6, EIF3S5, EIF3S4, EIF3S3, EIF3S6IP, EIF3S2, EIF3S9, EIF3S12, EIF3S10, EIF3S8, EIF3S1, EIF3S7, PCID1)	EIF3A (Q14152), EIF3B (P55884), EIF3C (Q99613), EIF3D (O15371), EIF3E (P60228), EIF3F (O00303), EIF3G (O75821), EIF3H (O15372), EIF3I (Q13347), EIF3J (O75822), EIF3K (Q9UBQ5), EIF3L (Q9Y262), EIF3M (Q7L2H7)	13	EIF3A (P38249), EIF3B (P06103), EIF3C (P32497), EIF3G (Q04067), EIF3I (P40217), EIF3J (Q05775), eif2a (P53235), rpn8 (Q08723)	8	2	0.75 [('TRANSLATIONAL INITIATION', '3.08e-12')]	0.75 [('EUKARYOTIC TRANSLATION INITIATION FACTOR 3 COMPLEX', '6.60e-16')]	0.88 [('TRANSLATION INITIATION FACTOR ACTIVITY', '8.84e-15')]
193	PA700-20S-PA28 complex	PRS10 (P62333), PRS4 (P62191), PRS6A (P17980), PRS6B (P43686), PRS7 (P35998), PRS8 (P62195), PSA1 (P25786), PSA2 (P25787), PSA3 (P25788), PSA4 (P25789), PSA5 (P28066), PSA6 (P60900), PSA7 (O14818), PSB1 (P20618), PSB2 (P49721), PSB3 (P49720), PSB4 (P28070), PSB5 (P28074), PSB6 (P28072), PSB7 (Q99436), PSD10 (O75832), PSD11 (O00231), PSD12 (O00232), PSD13 (Q9UNM6), PSD7 (P51665), PSDE (O00487), PS…	36	PRS10 (P53549), PRS4 (P40327), PRS6A (P33297), PRS6B (P33298), PRS7 (P33299), PRS8 (Q01939), PSA1 (P40302), PSA2 (P23639), PSA3 (P21242), PSA4 (P23638), PSA6 (P21243), PSA7 (P40303), PSB1 (P23724), PSB2 (P22141), PSB3 (P25451), PSB4 (P30657), PSB5 (P30656), PSB6 (P38624), PSD10 (P50086), RPN1 (P38764), RPN10 (P38886), RPN11 (P43588), RPN12 (P32496), RPN2 (P32565), RPN3 (P40016), RPN5 (Q12250), RP…	34	4	0.91 [('ubiquitin-dependent protein catabolic process', '6.60e-16')]	0.76 [('nucleus', '1.46e-12')]	0.68 [('PROTEIN BINDING', '1.97e-02')]
1186	ESCRT-III complex	CHM1A (Q9HD42), CHM1B (Q7LBR1), CHM2A (O43633), CHM2B (Q9UQN3), CHM4A (Q9BY43), CHM4B (Q9H444), CHM4C (Q96CF2), CHMP3 (Q9Y3E7), CHMP5 (Q9NZZ3), CHMP6 (Q96FZ7)	10	DID2 (P69771), DID4 (P36108), SNF7 (P39929), VPS24 (P36095), vps20 (Q04272), vps60 (Q03390)	6	2	0.83 [('PROTEIN TRANSPORT', '7.65e-07'), ('late endosome to vacuole transport', '1.09e-11')]	0.67 [('ESCRT III complex', '1.86e-12')]	0.83 [('identical protein binding', '1.26e-04')]
2814	BRCA1-HDAC1-HDAC2 complex	BRCA1 (P38398), HDAC1 (Q13547), HDAC2 (Q92769)	3	HOS2 (P53096), RPD3 (P32561), hos1 (Q12214)	3	1	1.0 [('transcription', '1.08e-03')]	0.67 [('Rpd3L-Expanded complex', '1.47e-04')]	0.67 [('histone deacetylase activity', '8.61e-06')]
871	BRAF53-BRCA2 complex	BRCA2 (P51587), HDAC1 (Q13547), HDAC2 (Q92769), HM20B (Q9P0W2), LSD1 (O60341), PF21A (Q96BD5), RCOR1 (Q9UKL0)	7	HOS2 (P53096), RPD3 (P32561), hos1 (Q12214)	3	1	1.0 [('TRANSCRIPTION', '1.08e-03')]	0.67 [('Rpd3L-Expanded complex', '1.47e-04')]	0.67 [('histone deacetylase activity', '8.61e-06')]
5400	BRCC complex	BRCA1 (P38398), BRCA2 (P51587), BRCC3 (P46736), BRE (Q9NXR7), RAD51 (Q06609)	5	RAD51 (P25454), RAD57 (P25301), dmc1 (P25453)	3	1	0.67 [('heteroduplex formation', '3.62e-05'), ('meiotic joint molecule formation', '3.88e-06'), ('telomere maintenance via recombination', '1.55e-04')]	0.67 [('condensed nuclear chromosome', '1.17e-04')]	1.0 [('ATP binding', '9.45e-03'), ('DNA-dependent ATPase activity', '2.94e-08')]
934	FACT-NEK9 complex	NEK9 (Q8TD19), SP16H (Q9Y5B9), SSRP1 (Q08945)	3	POB3 (Q04636), SPT16 (P32558), rt106 (P40161)	3	1	1.0 [('nucleosome assembly', '2.52e-07')]	0.67 [('FACT complex', '8.62e-07'), ('nuclear chromatin', '3.74e-04')]	0.67 []
5683	hRAD51C-hXRCC3 complex	RAD51 (Q06609), XRCC2 (O43543)	2	RAD51 (P25454), RAD57 (P25301), dmc1 (P25453)	3	1	0.67 [('heteroduplex formation', '3.62e-05'), ('meiotic joint molecule formation', '3.88e-06'), ('telomere maintenance via recombination', '1.55e-04')]	0.67 [('condensed nuclear chromosome', '1.17e-04')]	1.0 [('ATP binding', '9.45e-03'), ('DNA-dependent ATPase activity', '2.94e-08')]
1851	BUB1-BUB3 complex	BUB1 (O43683), BUB3 (O43684)	2	BUB1 (P41695), BUB3 (P26449), gle2 (P40066)	3	1	0.67 [('mitotic cell cycle spindle assembly checkpoint', '1.23e-04')]	0.67 [('condensed nuclear chromosome kinetochore', '1.63e-04')]	1.0 []
2824	BRCA1-RAD51 complex	BRCA1 (P38398), RAD51 (Q06609)	2	RAD51 (P25454), RAD57 (P25301), dmc1 (P25453)	3	1	0.67 [('heteroduplex formation', '3.62e-05'), ('meiotic joint molecule formation', '3.88e-06'), ('telomere maintenance via recombination', '1.55e-04')]	0.67 [('CONDENSED NUCLEAR CHROMOSOME', '1.17e-04')]	1.0 [('ATP binding', '9.45e-03'), ('DNA-dependent ATPase activity', '2.94e-08')]
1470	pRb2/p130-multimolecular complex (DNMT1, E2F5, SuV39H1, HDAC1, RBL2)	DNMT1 (P26358), E2F5 (Q15329), HDAC1 (Q13547), RBL2 (Q08999), SUV91 (O43463)	5	HOS2 (P53096), RPD3 (P32561), hos1 (Q12214)	3	1	1.0 [('TRANSCRIPTION', '1.08e-03')]	0.67 [('Rpd3L-Expanded complex', '1.47e-04')]	0.67 [('histone deacetylase activity', '8.61e-06')]
1007	CAK core complex (Cdk-activating kinase core complex)	CCNH (P51946), CDK7 (P50613)	2	CCL1 (P37366), KIN28 (P06242), ssn8 (P47821)	3	1	0.67 [('TRANSCRIPTION INITIATION FROM RNA POLYMERASE II PROMOTER', '7.74e-04')]	0.67 [('holo TFIIH complex', '5.17e-06')]	1.0 [('general RNA polymerase II transcription factor activity', '1.49e-06')]
1488	DNMT1-RB1-HDAC1-E2F1 complex	DNMT1 (P26358), E2F1 (Q01094), HDAC1 (Q13547), RB (P06400)	4	HOS2 (P53096), RPD3 (P32561), hos1 (Q12214)	3	1	1.0 [('TRANSCRIPTION', '1.08e-03')]	0.67 [('Rpd3L-Expanded complex', '1.47e-04')]	0.67 [('histone deacetylase activity', '8.61e-06')]
648	HDAC1-associated core complex cI	HDAC1 (Q13547), LSD1 (O60341), RCOR1 (Q9UKL0)	3	HOS2 (P53096), RPD3 (P32561), hos1 (Q12214)	3	1	1.0 [('TRANSCRIPTION', '1.08e-03')]	0.67 [('Rpd3L-Expanded complex', '1.47e-04')]	0.67 [('histone deacetylase activity', '8.61e-06')]
5695	TIP5-DNMT-HDAC1 complex	BAZ2A (Q9UIF9), DNM3B (Q9UBC3), DNMT1 (P26358), HDAC1 (Q13547)	4	HOS2 (P53096), RPD3 (P32561), hos1 (Q12214)	3	1	1.0 [('TRANSCRIPTION', '1.08e-03')]	0.67 [('Rpd3L-Expanded complex', '1.47e-04')]	0.67 [('histone deacetylase activity', '8.61e-06')]
435	BASC (Ab 81) complex (BRCA1-associated genome surveillance complex)	ATM (Q13315), BRCA1 (P38398), MLH1 (P40692), RFC1 (P35251), RFC2 (P35250), RFC4 (P35249)	6	CTF18 (P49956), RFC1 (P38630), RFC2 (P40348), RFC3 (P38629), RFC4 (P40339), RFC5 (P38251), atm (P38110), atr (P38111), mlh1 (P38920), mlh3 (Q12083)	10	4	0.6 [('mismatch repair', '7.55e-13')]	0.7 [('nucleus', '2.43e-03')]	1.0 [('ATP BINDING', '1.73e-09'), ('protein binding', '1.38e-03')]
5423	HSP70-BAG5-PARK2 complex	BAG5 (Q9UL15), HSP71 (P08107), HSP74 (P34932), PRKN2 (O60260)	4	HSP71 (P10591), HSP79 (P32590), hsp72 (P10592), hsp74 (P22202), hsp75 (P11484), hsp76 (P40150), hsp7f (P32589)	7	5	0.57 [('response to stress', '6.05e-06')]	0.71 [('cytoplasm', '1.97e-02')]	1.0 [('ATP binding', '8.49e-07')]
353	DNA ligase IV-condensin complex	DNLI4 (P49917), SMC2 (O95347), SMC4 (Q9NTJ3)	3	SMC1 (P32908), SMC3 (P47037), dnli1 (P04819), dnli4 (Q08387), smc2 (P38989), smc4 (Q12267), smc6 (Q12749)	7	5	0.86 [('CELL DIVISION', '2.16e-08')]	0.43 []	1.0 [('ATP BINDING', '1.13e-06'), ('protein binding', '1.51e-02')]
5211	RAF1-PPP2-PIN1 complex	2AAA (P30153), 2ABA (P63151), PIN1 (Q13526), PP2AB (P62714), RAF1 (P04049)	5	2AAA (P31383), 2ABA (Q00362), PP2A1 (P23594), PP2A2 (P23595), pp11 (P20604), pp2a4 (P32838), pp4c (P32345)	7	3	0.71 [('PROTEIN AMINO ACID DEPHOSPHORYLATION', '3.12e-10')]	0.71 [('nucleus', '1.09e-02')]	0.86 []
529	NuA4/Tip60 HAT complex	ACL6A (O96019), BRD8 (Q9H0E9), CA149 (Q9HAF1), DMAP1 (Q9NPF5), EP400 (Q96L91), EPC1 (Q9H2F5), ING3 (Q9NXR8), MO4L1 (Q9UBU8), MO4L2 (Q15014), MRGBP (Q9NV56), RUVB1 (Q9Y265), RUVB2 (Q9Y230), TIP60 (Q92993), TRRAP (Q9Y4A5), VPS72 (Q15906), YETS4 (O95619)	16	AF9 (P53930), ARP4 (P80428), EPL1 (P43572), ESA1 (Q08649), RUVB1 (Q03940), RUVB2 (Q12464), SAS3 (P34218), SWC4 (P53201), SWR1 (Q05471), TRA1 (P38811), eaf3 (Q12432), pho23 (P50947), sas2 (P40963), yng1 (Q08465)	14	4	0.93 [('TRANSCRIPTION', '1.13e-14')]	0.5 [('NUA4 HISTONE ACETYLTRANSFERASE COMPLEX', '7.78e-16')]	0.86 [('protein binding', '6.52e-03')]
5222	p14-Mp1-MEK1 complex	MAPIP (Q9Y2Q5), MP2K1 (Q02750), MPKS1 (Q9UHA4)	3	MKK2 (P32491), mkk1 (P32490), pbs2 (P08018), ste7 (P06784)	4	3	0.75 [('protein amino acid phosphorylation', '1.85e-04')]	0.5 [('cellular bud tip', '3.86e-03')]	1.0 [('ATP binding', '7.31e-04'), ('protein serine/threonine kinase activity', '3.31e-07')]
5920	KSR1-RAF1-MEK complex	KSR1 (Q8IVT5), MP2K1 (Q02750), MP2K2 (P36507), RAF1 (P04049)	4	MKK2 (P32491), mkk1 (P32490), pbs2 (P08018), ste7 (P06784)	4	3	0.75 [('protein amino acid phosphorylation', '1.85e-04')]	0.5 [('cellular bud tip', '3.86e-03')]	1.0 [('ATP BINDING', '7.31e-04'), ('PROTEIN SERINE/THREONINE KINASE ACTIVITY', '3.31e-07')]
757	Prune-GSK3beta complex	GSK3B (P49841), PRUNE (Q86TP1)	2	KOM8 (Q12222), mck1 (P21965), mds1 (P38615), mrk1 (P50873)	4	3	1.0 [('protein amino acid phosphorylation', '1.05e-06')]	0.25 []	1.0 [('ATP binding', '7.31e-04')]
2756	Ubiquitin-protein-ligase (UBE2N, UBE2V2/MMS2)	UB2V2 (Q15819), UBE2N (P61088)	2	MMS2 (P53152), UBC13 (P52490), ubc1 (P21734), ubc12 (P52491)	4	2	1.0 [('regulation of protein metabolic process', '2.54e-10')]	0.5 [('ubiquitin conjugating enzyme complex', '2.58e-06')]	0.75 []
2748	Ubiquitin-protein ligase (UBE2N, UBE2V2/MMS2)	UB2V1 (Q13404), UBE2N (P61088)	2	MMS2 (P53152), UBC13 (P52490), ubc1 (P21734), ubc12 (P52491)	4	2	1.0 [('regulation of protein metabolic process', '2.54e-10')]	0.5 [('ubiquitin conjugating enzyme complex', '2.58e-06')]	0.75 []
3036	Ubiquitin E3 ligase (SKP1A, SKP2, CUL1, CKS1B, RBX1)	CKS1 (P61024), CUL1 (Q13616), RBX1 (P62877), SKP1 (P63208), SKP2 (Q13309)	5	CDC53 (Q12018), RBX1 (Q08273), SKP1 (P52286), cks1 (P20486)	4	1	0.75 [('G1/S TRANSITION OF MITOTIC CELL CYCLE', '1.21e-05'), ('G2/M transition of mitotic cell cycle', '5.65e-06'), ('SCF-dependent proteasomal ubiquitin-dependent protein catabolic process', '9.60e-08'), ('protein ubiquitination during ubiquitin-dependent protein catabolic process', '9.31e-07')]	1.0 [('nucleus', '9.01e-03')]	0.5 [('DNA replication origin binding', '1.13e-03')]
3054	MAD1-mSin3A-HDAC2 complex	HDAC2 (Q92769), MAD1 (Q05195), SIN3A (Q96ST3)	3	HOS2 (P53096), RPD3 (P32561), SIN3 (P22579), hos1 (Q12214)	4	1	1.0 [('TRANSCRIPTION', '1.04e-04')]	0.75 [('Rpd3L-Expanded complex', '9.47e-07')]	0.5 [('histone deacetylase activity', '2.58e-05'), ('transcription coactivator activity', '3.94e-04'), ('transcription corepressor activity', '2.71e-04')]
749	MeCP2-SIN3A-HDAC complex	HDAC1 (Q13547), HDAC2 (Q92769), MECP2 (P51608), SIN3A (Q96ST3)	4	HOS2 (P53096), RPD3 (P32561), SIN3 (P22579), hos1 (Q12214)	4	1	1.0 [('TRANSCRIPTION', '1.04e-04')]	0.75 [('Rpd3L-Expanded complex', '9.47e-07')]	0.5 [('HISTONE DEACETYLASE ACTIVITY', '2.58e-05'), ('transcription coactivator activity', '3.94e-04'), ('transcription corepressor activity', '2.71e-04')]
720	PU.1-SIN3A-HDAC complex	HDAC1 (Q13547), SIN3A (Q96ST3), SPI1 (P17947)	3	HOS2 (P53096), RPD3 (P32561), SIN3 (P22579), hos1 (Q12214)	4	1	1.0 [('TRANSCRIPTION', '1.04e-04')]	0.75 [('Rpd3L-Expanded complex', '9.47e-07')]	0.5 [('histone deacetylase activity', '2.58e-05'), ('transcription coactivator activity', '3.94e-04'), ('transcription corepressor activity', '2.71e-04')]
376	PCNA-MutS-alpha-MutL-alpha-DNA complex	MLH1 (P40692), MSH2 (P43246), MSH6 (P52701), PCNA (P12004), PMS2 (P54278)	5	MLH1 (P38920), MLH2 (Q07980), PMS1 (P14242), mlh3 (Q12083)	4	1	0.75 [('reciprocal meiotic recombination', '5.84e-06')]	0.5 [('MutLalpha complex', '2.58e-06'), ('MutLbeta complex', '2.58e-06')]	1.0 [('ATP BINDING', '1.10e-03'), ('mismatched DNA binding', '1.30e-11')]
291	MSH2-MLH1-PMS2 DNA-repair initiation complex	MLH1 (P40692), MSH2 (P43246), PMS2 (P54278)	3	MLH1 (P38920), MLH2 (Q07980), PMS1 (P14242), mlh3 (Q12083)	4	1	0.75 [('reciprocal meiotic recombination', '5.84e-06')]	0.5 [('MutLalpha complex', '2.58e-06'), ('MutLbeta complex', '2.58e-06')]	1.0 [('ATP BINDING', '1.10e-03'), ('mismatched DNA binding', '1.30e-11')]
2718	MAD2-CDC20 complex	CDC20 (Q12834), MD2L1 (Q13257)	2	AMA1 (P50082), CDC20 (P26309), CDH1 (P53197), mad2 (P40958)	4	1	1.0 [('CELL DIVISION', '3.51e-06')]	0.75 [('anaphase-promoting complex', '3.65e-07')]	0.5 [('protein binding, bridging', '6.47e-04')]
2852	Brg1-based SWI/SNF chromatin remodeling complex	ACL6A (O96019), SMRC1 (Q92922), SMRC2 (Q8TAQ2), SNF5 (Q12824)	4	RSC8 (P43609), SFH1 (Q06168), SWI3 (P32591), arp4 (P80428)	4	1	0.75 [('ATP-dependent chromatin remodeling', '6.50e-07')]	0.5 [('RSC complex', '1.75e-04')]	1.0 []
285	PCNA-MLH1-PMS1 complex	MLH1 (P40692), PCNA (P12004), PMS1 (P54277)	3	MLH1 (P38920), MLH2 (Q07980), PMS1 (P14242), mlh3 (Q12083)	4	1	0.75 [('reciprocal meiotic recombination', '5.84e-06')]	0.5 [('MutLalpha complex', '2.58e-06'), ('MutLbeta complex', '2.58e-06')]	1.0 [('ATP binding', '1.10e-03'), ('MISMATCHED DNA BINDING', '1.30e-11')]
2856	NuA4/Tip60 HAT complex	ACL6A (O96019), BRD8 (Q9H0E9), DMAP1 (Q9NPF5), EP400 (Q96L91), EPC1 (Q9H2F5), ING3 (Q9NXR8), MO4L1 (Q9UBU8), RUVB1 (Q9Y265), TIP60 (Q92993), TRRAP (Q9Y4A5)	10	ARP4 (P80428), EPL1 (P43572), ESA1 (Q08649), RUVB1 (Q03940), RUVB2 (Q12464), SAS3 (P34218), SWC4 (P53201), SWR1 (Q05471), TRA1 (P38811), eaf3 (Q12432), pho23 (P50947), sas2 (P40963), yng1 (Q08465)	13	4	0.92 [('TRANSCRIPTION', '1.68e-13')]	0.46 [('NUA4 HISTONE ACETYLTRANSFERASE COMPLEX', '2.93e-13')]	0.85 [('protein binding', '1.25e-02')]
160	Condensin II	CNDD3 (P42695), CNDG2 (Q86XI2), CNDH2 (Q6IBW4), SMC2 (O95347), SMC4 (Q9NTJ3)	5	SMC1 (P32908), SMC3 (P47037), smc2 (P38989), smc4 (Q12267), smc6 (Q12749)	5	3	0.8 [('CELL DIVISION', '2.57e-05')]	0.4 [('nuclear condensin complex', '4.30e-05'), ('nuclear mitotic cohesin complex', '2.58e-05')]	1.0 [('ATP binding', '1.27e-04')]
5253	MNK1-eIF4F complex	IF4A1 (P60842), IF4E (P06730), IF4G1 (Q04637), IF4G2 (P78344), MKNK1 (Q9BUB5)	5	FAL1 (Q12099), IF4A (P10081), IF4E (P07260), IF4F1 (P39935), dhh1 (P39517)	5	1	0.6 [('regulation of translation', '5.93e-06'), ('translational initiation', '1.10e-05')]	0.6 [('EUKARYOTIC TRANSLATION INITIATION FACTOR 4F COMPLEX', '8.17e-09'), ('ribosome', '5.93e-06')]	1.0 [('RNA binding', '1.37e-06')]
1030	CAK-ERCC2 complex	CCNH (P51946), CDK7 (P50613), ERCC2 (P18074), MAT1 (P51948)	4	CCL1 (P37366), KIN28 (P06242), RAD3 (P06839), TFB3 (Q03290), ssn8 (P47821)	5	1	0.6 [('TRANSCRIPTION INITIATION FROM RNA POLYMERASE II PROMOTER', '1.49e-05')]	0.6 [('holo TFIIH complex', '4.90e-09')]	1.0 []
1059	Retromer complex (SNX1, SNX2, VPS35, VPS29, VPS26A)	SNX1 (Q13596), SNX2 (O60749), VP26A (O75436), VPS29 (Q9UBQ0), VPS35 (Q96QK1)	5	PEP11 (P38759), VPS26 (P40335), VPS35 (P34110), VPS5 (Q92331), snx4 (P47057)	5	1	0.8 [('PROTEIN TRANSPORT', '2.03e-05'), ('retrograde transport, endosome to Golgi', '1.47e-09')]	0.8 [('ENDOSOME', '4.15e-07')]	0.6 [('identical protein binding', '2.49e-02')]
752	SMRT core complex	HDAC3 (O15379), NCOR2 (Q9Y618), TBL1X (O60907)	3	HOS2 (P53096), RPD3 (P32561), SIF2 (P38262), SNT1 (P25357), hos1 (Q12214)	5	1	0.8 [('histone deacetylation', '5.86e-09')]	0.8 [('Rpd3L-Expanded complex', '1.80e-09')]	0.6 []
1009	TFIIH transcription factor complex	CCNH (P51946), CDK7 (P50613), ERCC2 (P18074), ERCC3 (P19447), MAT1 (P51948), TF2H1 (P32780), TF2H2 (Q13888), TF2H3 (Q13889), TF2H4 (Q92759), TF2H5 (Q6ZYL4)	10	CCL1 (P37366), KIN28 (P06242), RAD25 (Q00578), RAD3 (P06839), SSL1 (Q04673), TFB1 (P32776), TFB2 (Q02939), TFB3 (Q03290), TFB4 (Q12004), ssn8 (P47821)	10	1	0.8 [('TRANSCRIPTION INITIATION FROM RNA POLYMERASE II PROMOTER', '1.74e-15')]	0.6 [('SSL2-core TFIIH complex portion of NEF3 complex', '8.80e-16'), ('SSL2-core TFIIH complex portion of holo TFIIH complex', '8.80e-16')]	0.8 [('general RNA polymerase II transcription factor activity', '8.80e-16')]
1737	SF3b complex	DDX42 (Q86XP3), PHF5A (Q7RTV0), PM14 (Q9Y3B4), SF3B1 (O75533), SF3B2 (Q13435), SF3B3 (Q15393), SF3B4 (Q15427), SF3B5 (Q9BWJ5)	8	CUS1 (Q02554), HSH49 (Q99181), RDS3 (Q06835), RSE1 (Q04693), SF3B1 (P49955), prp5 (P21372)	6	1	0.5 [('spliceosome assembly', '2.05e-07')]	0.83 [('U2 snRNP', '1.06e-12')]	0.83 []
1544	PPP2CA-PPP2R1A-PPP2R3A complex	2AAA (P30153), P2R3A (Q06190), PP2AA (P67775)	3	2AAA (P31383), PP2A1 (P23594), PP2A2 (P23595), pp11 (P20604), pp2a4 (P32838), pp4c (P32345)	6	3	0.67 [('PROTEIN AMINO ACID DEPHOSPHORYLATION', '7.24e-08')]	0.67 []	0.83 [('iron ion binding', '2.52e-08'), ('manganese ion binding', '1.20e-09')]
3015	p27-cyclinE-Cdk2 - Ubiquitin E3 ligase (SKP1A, SKP2, CUL1, CKS1B, RBX1) complex	CCNE1 (P24864), CDK2 (P24941), CDN1B (P46527), CKS1 (P61024), CUL1 (Q13616), RBX1 (P62877), SKP1 (P63208), SKP2 (Q13309)	8	CDC28 (P00546), CKS1 (P20486), PHO85 (P17157), cdc53 (Q12018), rbx1 (Q08273), skp1 (P52286)	6	3	0.5 [('G1/S TRANSITION OF MITOTIC CELL CYCLE', '6.00e-05'), ('G2/M transition of mitotic cell cycle', '2.80e-05'), ('SCF-dependent proteasomal ubiquitin-dependent protein catabolic process', '4.79e-07'), ('cell division', '3.78e-03'), ('protein ubiquitination during ubiquitin-dependent protein catabolic process', '4.63e-06')]	1.0 [('nucleus', '3.22e-04')]	0.67 []
1003	RC complex (Replication competent complex)	CCNA2 (P20248), CDK2 (P24941), DPOA2 (Q14181), DPOLA (P09884), RFC1 (P35251), RFC2 (P35250), RFC3 (P40938), RFC4 (P35249), RFC5 (P40937)	9	CTF18 (P49956), DPOA (P13382), DPOA2 (P38121), RFC1 (P38630), RFC2 (P40348), RFC3 (P38629), RFC4 (P40339), RFC5 (P38251), cdc28 (P00546), dpod (P15436), dpoz (P14284), pho85 (P17157)	12	4	0.5 [('leading strand elongation', '3.68e-13'), ('mismatch repair', '3.31e-12')]	0.67 [('nucleus', '1.56e-03')]	1.0 [('protein binding', '2.78e-04')]
1100	DNA polymerase alpha-primase complex	DPOA2 (Q14181), DPOLA (P09884), PRI1 (P49642), PRI2 (P49643)	4	DPOA (P13382), DPOA2 (P38121), PRI1 (P10363), PRI2 (P20457), dpod (P15436), dpoz (P14284)	6	2	0.67 [('DNA replication initiation', '3.24e-08'), ('lagging strand elongation', '1.32e-09')]	0.67 [('alpha DNA polymerase', '1.86e-12')]	0.83 [('DNA BINDING', '2.06e-06')]
2990	mTOR-signaling complex (FRAP1/mTOR, GBL, RAPTOR)	FRAP (P42345), LST8 (Q9BVC4), RPTOR (Q8N122)	3	KOG1 (P38873), LST8 (P41318), TOR1 (P35169), TOR2 (P32600), atm (P38110), atr (P38111), tra1 (P38811)	7	3	0.57 [('TOR signaling pathway', '7.36e-09'), ('regulation of cell growth', '1.78e-09')]	0.57 [('TORC1 COMPLEX', '2.71e-11'), ('mitochondrion', '1.31e-02')]	1.0 [('protein binding', '1.89e-02')]
3063	Brg1-associated complex II	ACL6A (O96019), ANM5 (O14744), ARI1A (O14497), SMCA4 (P51532), SMRC1 (Q92922), SMRC2 (Q8TAQ2), SNF5 (Q12824)	7	RSC8 (P43609), SFH1 (Q06168), SNF2 (P22082), STH1 (P32597), SWI3 (P32591), arp4 (P80428), ybv8 (P38266)	7	2	0.71 [('ATP-dependent chromatin remodeling', '3.74e-11')]	0.43 [('RSC complex', '2.89e-06')]	1.0 [('protein binding', '1.13e-02')]
2685	RNA polymerase II (RNAPII)	CTDP1 (Q9Y5B0), RPAB1 (P19388), RPAB2 (P61218), RPAB3 (P52434), RPAB4 (P53803), RPAB5 (P62875), RPAP1 (Q9BWH6), RPB1 (P24928), RPB11 (P52435), RPB2 (P30876), RPB3 (P19387), RPB4 (O15514), RPB7 (P62487), RPB9 (P36954), T2FA (P35269), T2FB (P13984), TF2B (Q00403)	17	RPA1 (P10964), RPAB1 (P20434), RPAB2 (P20435), RPAB3 (P20436), RPAB5 (P22139), RPAC1 (P07703), RPAC2 (P28000), RPB1 (P04050), RPB11 (P38902), RPB2 (P08518), RPB3 (P16370), RPB4 (P20433), RPB7 (P34087), RPB9 (P27999), RPC1 (P04051), RPC2 (P22276), fcp1 (Q03254), tf2b (P29055)	18	2	0.56 [('transcription from RNA polymerase II promoter', '6.60e-16')]	0.61 [('DNA-directed RNA polymerase II, core complex', '6.60e-16')]	0.89 [('DNA-DIRECTED RNA POLYMERASE ACTIVITY', '6.60e-16')]
3269	RB1-HDAC1-BRG1 complex	HDAC1 (Q13547), RB (P06400), SMCA4 (P51532)	3	HOS2 (P53096), SNF2 (P22082), hos1 (Q12214), rpd3 (P32561), sth1 (P32597)	5	3	0.8 [('TRANSCRIPTION', '2.47e-04')]	0.4 [('Rpd3L-Expanded complex', '3.66e-04')]	0.8 []
2162	APPBP1-UBA3 complex	UBA3 (Q8TBC4), ULA1 (Q13564)	2	UBA3 (Q99344), ULA1 (Q12059), rhc31 (Q06624), uba2 (P52488), uba4 (P38820)	5	3	0.8 [('MODIFICATION-DEPENDENT PROTEIN CATABOLIC PROCESS', '2.10e-07')]	0.4 [('SUMO activating enzyme complex', '2.87e-06')]	0.8 [('ATP binding', '3.32e-03')]
368	ERCC1-ERCC4-MSH2 complex	ERCC1 (P07992), MSH2 (P43246), XPF (Q92889)	3	MSH2 (P25847), MSH3 (P25336), MSH6 (Q03834), msh1 (P25846), msh4 (P40965), rad1 (P06777), rad10 (P06838)	7	4	0.71 [('meiotic mismatch repair', '2.07e-13')]	0.29 [('MutSalpha complex', '9.05e-06'), ('MutSbeta complex', '9.05e-06'), ('nuclear chromosome', '8.17e-04'), ('nucleotide-excision repair factor 1 complex', '2.71e-05')]	1.0 [('protein binding', '2.26e-02')]
3979	mTORC2 complex (mTOR/FRAP1, LST8, mAVO3/RICTOR, SIN1)	FRAP (P42345), LST8 (Q9BVC4), RICTR (Q6R327), SIN1 (Q9BPZ7)	4	LST8 (P41318), TOR1 (P35169), TOR2 (P32600), atm (P38110), atr (P38111), tra1 (P38811), tsc11 (P40061)	7	4	0.57 [('TOR signaling pathway', '1.32e-08'), ('regulation of cell growth', '3.21e-09')]	0.43 [('TORC1 complex', '1.28e-07'), ('TORC2 COMPLEX', '2.57e-07'), ('extrinsic to internal side of plasma membrane', '2.57e-07'), ('membrane fraction', '3.65e-04')]	1.0 []
2145	HSF1-YWHAE complex	1433E (P62258), HSF1 (Q00613)	2	BMH1 (P29311), BMH2 (P34730), hsf (P10961), skn7 (P38889)	4	2	0.5 [('DNA damage checkpoint', '4.69e-04'), ('Ras protein signal transduction', '5.47e-04'), ('ascospore formation', '7.01e-03'), ('cell wall chitin biosynthetic process', '3.97e-04'), ('glycogen metabolic process', '7.21e-04'), ('negative regulation of ubiquitin-protein ligase activity during mitotic cell cycle', '1.81e-05'), ('pseudohyphal growth', '9.83e-03'), ('signal transduction during fila…	1.0 [('nucleus', '1.80e-02')]	0.5 [('DNA replication origin binding', '2.27e-03'), ('protein domain specific binding', '1.81e-05')]
419	Farnesyltransferase	FNTA (P49354), FNTB (P49356)	2	PGTA (Q00618), PGTB2 (P20133), fnta (P29703), fntb (P22007)	4	2	0.75 [('protein amino acid geranylgeranylation', '2.61e-09')]	0.5 [('Rab-protein geranylgeranyltransferase complex', '1.72e-06'), ('protein farnesyltransferase complex', '1.72e-06')]	0.75 []
5426	ANCO1-HDAC3 complex	ANR11 (Q6UB99), HDAC3 (O15379)	2	HOS2 (P53096), RPD3 (P32561), hos1 (Q12214), kri1 (P42846)	4	2	0.75 [('transcription', '3.08e-03')]	0.5 [('Rpd3L-Expanded complex', '2.20e-04')]	0.75 []
758	Prune/Nm23-H1 complex	NDKA (P15531), PRUNE (Q86TP1)	2	NDK (P36010), ppx1 (P38698)	2	1	0.5 [('CTP biosynthetic process', '1.48e-02'), ('GTP biosynthetic process', '1.48e-02'), ('UTP biosynthetic process', '4.93e-03'), ('nucleoside diphosphate phosphorylation', '4.93e-03'), ('polyphosphate catabolic process', '9.85e-03')]	1.0 [('cytosol', '1.39e-02')]	0.5 [('exopolyphosphatase activity', '9.85e-03'), ('nucleoside diphosphate kinase activity', '4.93e-03')]
1255	Ubiquitin E3 ligase (SIAH1, SIP, SKP1A, TBL1X)	CYBP (Q9HB71), SIAH1 (Q8IUQ4), SKP1 (P63208), TBL1X (O60907)	4	SIF2 (P38262), skp1 (P52286)	2	1	0.5 []	0.5 []	1.0 []
2714	Ubiquitin E3 ligase (CHEK1, CUL1)	CHK1 (O14757), CUL1 (Q13616)	2	CDC53 (Q12018), chk1 (P38147)	2	1	0.5 []	1.0 []	0.5 []
436	BASC (Ab C-20) complex (BRCA1-associated genome surveillance complex)	BRCA1 (P38398), MSH6 (P52701), RAD50 (Q92878)	3	RAD50 (P12753), msh6 (Q03834)	2	1	0.5 [('meiotic DNA double-strand break formation', '2.12e-02'), ('meiotic DNA double-strand break processing', '1.59e-02'), ('negative regulation of endodeoxyribonuclease activity', '5.30e-03')]	0.5 [('MRE11 COMPLEX', '1.59e-02'), ('MUTSALPHA COMPLEX', '1.06e-02')]	1.0 [('ATPase activity', '1.33e-03')]
1166	p400-associated complex	ACL6A (O96019), ACL6B (O94805), ACTB (P60709), EP400 (Q96L91), RUVB1 (Q9Y265), RUVB2 (Q9Y230), TRRAP (Q9Y4A5)	7	ARP4 (P80428), ARP5 (P53946), RUVB1 (Q03940), RUVB2 (Q12464), SWR1 (Q05471), TRA1 (P38811), act (P60010), arp1 (P38696), arp2 (P32381), arp7 (Q12406)	10	4	0.6 [('TRANSCRIPTION', '4.77e-05')]	0.5 [('Ino80 complex', '2.33e-11'), ('Swr1 complex', '3.78e-11')]	0.9 [('protein binding', '1.82e-02')]
370	MSH2-MSH6-PMS1-MLH1 complex	MLH1 (P40692), MSH2 (P43246), MSH6 (P52701), PMS1 (P54277)	4	MSH2 (P25847), MSH3 (P25336), MSH6 (Q03834), msh1 (P25846), msh4 (P40965)	5	2	0.6 [('meiotic mismatch repair', '1.37e-07')]	0.4 [('MUTSALPHA COMPLEX', '4.31e-06'), ('MutSbeta complex', '4.31e-06'), ('nuclear chromosome', '3.90e-04')]	1.0 [('ATP BINDING', '1.27e-04')]
378	MutS-beta complex	MSH2 (P43246), MSH3 (P20585)	2	MSH2 (P25847), MSH3 (P25336), MSH6 (Q03834), msh1 (P25846), msh4 (P40965)	5	2	0.6 [('meiotic mismatch repair', '1.37e-07')]	0.4 [('MUTSBETA COMPLEX', '4.31e-06'), ('MutSalpha complex', '4.31e-06'), ('nuclear chromosome', '3.90e-04')]	1.0 [('ATP binding', '1.27e-04')]
297	PCNA-DNA polymerase delta complex	DPOD1 (P28340), DPOD2 (P49005), DPOD3 (Q15054), DPOD4 (Q9HCU8), PCNA (P12004)	5	DPOD (P15436), DPOD2 (P46957), PCNA (P15873), dpoa (P13382), dpoz (P14284)	5	2	0.6 [('RNA-dependent DNA replication', '4.08e-08'), ('base-excision repair', '4.89e-07'), ('leading strand elongation', '1.48e-06'), ('nucleotide-excision repair', '5.40e-06'), ('postreplication repair', '1.85e-06')]	0.4 [('delta DNA polymerase complex', '2.15e-05')]	1.0 [('DNA binding', '8.85e-07')]
1226	H2AX complex I	CALR (P27797), DHX30 (Q7L2E3), GRP78 (P11021), H2AX (P16104), H2B3B (Q8N257), NPM (P06748), PARP1 (P09874)	7	H2A1 (P04911), H2A2 (P04912), H2B1 (P02293), H2B2 (P02294), grp78 (P16474), hsp77 (P12398)	6	2	0.67 [('NUCLEOSOME ASSEMBLY', '1.01e-08')]	0.67 [('nuclear nucleosome', '9.74e-11')]	0.67 [('DNA BINDING', '9.73e-05')]
819	20S methylosome-SmD complex	ANM5 (O14744), ICLN (P54105), SMD1 (P62314), SMD3 (P62318)	4	SMD1 (Q02260), SMD3 (P43321), hsl7 (P38274)	3	1	0.67 [('nuclear mRNA splicing, via spliceosome', '2.83e-03')]	0.67 [('U1 snRNP', '2.05e-04'), ('U4/U6 x U5 tri-snRNP complex', '5.68e-04'), ('U5 snRNP', '1.58e-04'), ('commitment complex', '8.28e-05')]	0.67 [('mRNA binding', '6.54e-04')]
5189	YWHAQ-CALM1-CABIN1 complex	1433T (P27348), CABIN (Q9Y6J0), CALM (P62158)	3	BMH1 (P29311), BMH2 (P34730), cdc31 (P06704)	3	1	0.67 [('DNA damage checkpoint', '2.01e-04'), ('Ras protein signal transduction', '2.35e-04'), ('ascospore formation', '3.02e-03'), ('cell wall chitin biosynthetic process', '1.70e-04'), ('glycogen metabolic process', '3.10e-04'), ('negative regulation of ubiquitin-protein ligase activity during mitotic cell cycle', '7.75e-06'), ('pseudohyphal growth', '4.24e-03'), ('signal transduction during fil…	0.67 [('plasma membrane enriched fraction', '9.13e-03')]	0.67 [('DNA replication origin binding', '9.74e-04'), ('PROTEIN DOMAIN SPECIFIC BINDING', '7.75e-06')]
1045	Snurportin-CRM1-RanGTP complex	RAN (P62826), SPN1 (O95149), XPO1 (O14980)	3	GSP1 (P32835), GSP2 (P32836), xpo1 (P30822)	3	1	0.67 [('intracellular protein transport', '3.03e-03'), ('nucleocytoplasmic transport', '2.58e-05'), ('nucleus organization', '5.17e-06'), ('signal transduction', '1.14e-03')]	0.67 []	0.67 [('GTP binding', '7.60e-03'), ('GTPase activity', '2.93e-03')]
5718	eNOS-HSP90-AKT complex, VEGF induced	AKT1 (P31749), HS90A (P07900), NOS3 (P29474)	3	HSC82 (P15108), HSP82 (P02829), sch9 (P11792)	3	1	0.67 [('proteasome assembly', '1.37e-04')]	0.33 []	1.0 [('ATP binding', '1.10e-02')]
2170	Ubiquitin E3 ligase (CDC34, CUL1, RBX1)	CUL1 (Q13616), RBX1 (P62877), UB2R1 (P49427)	3	CDC53 (Q12018), RBX1 (Q08273), UBC3 (P14682), ubc7 (Q02159)	4	1	0.75 [('G1/S TRANSITION OF MITOTIC CELL CYCLE', '1.73e-05'), ('G2/M transition of mitotic cell cycle', '8.07e-06'), ('SCF-dependent proteasomal ubiquitin-dependent protein catabolic process', '1.37e-07'), ('protein ubiquitination during ubiquitin-dependent protein catabolic process', '1.33e-06')]	0.75 [('SCF ubiquitin ligase complex', '3.59e-07')]	0.5 [('ubiquitin-protein ligase activity', '4.41e-03')]
1552	TNPO2-RAN-NXF1 complex	NXF1 (Q9UBU9), RAN (P62826), TNPO2 (O14787)	3	GSP1 (P32835), GSP2 (P32836), IMB2 (P38217), mex67 (Q99257)	4	1	0.5 [('intracellular protein transport', '5.26e-03'), ('nucleocytoplasmic transport', '4.52e-05'), ('nucleus organization', '9.04e-06'), ('signal transduction', '1.99e-03')]	0.5 []	1.0 []
3044	SKI-NCOR1-SIN3A-HDAC1 complex	HDAC1 (Q13547), NCOR1 (O75376), SIN3A (Q96ST3), SKI (P12755)	4	HOS2 (P53096), RPD3 (P32561), SIN3 (P22579), SNT1 (P25357), hos1 (Q12214)	5	1	0.8 [('histone deacetylation', '1.37e-08'), ('transcription', '5.76e-04')]	0.8 [('Rpd3L-Expanded complex', '4.19e-09')]	0.4 [('TRANSCRIPTION COREPRESSOR ACTIVITY', '5.25e-04'), ('histone deacetylase activity', '5.02e-05'), ('transcription coactivator activity', '7.64e-04')]
1505	NCOR2 complex	HDAC1 (Q13547), HDAC2 (Q92769), HDAC3 (O15379), NCOR1 (O75376), NCOR2 (Q9Y618), SAP30 (O75446), SIN3A (Q96ST3)	7	HOS2 (P53096), RPD3 (P32561), SIN3 (P22579), SNT1 (P25357), hos1 (Q12214)	5	1	0.8 [('TRANSCRIPTION', '5.76e-04'), ('histone deacetylation', '1.37e-08')]	0.8 [('Rpd3L-Expanded complex', '4.19e-09')]	0.4 [('HISTONE DEACETYLASE ACTIVITY', '5.02e-05'), ('TRANSCRIPTION COREPRESSOR ACTIVITY', '5.25e-04'), ('transcription coactivator activity', '7.64e-04')]
3167	NCOR-SIN3-HDAC-HESX1 complex	HDAC1 (Q13547), HDAC2 (Q92769), HESX1 (Q9UBX0), NCOR2 (Q9Y618), SIN3A (Q96ST3), SIN3B (O75182)	6	HOS2 (P53096), RPD3 (P32561), SIN3 (P22579), SNT1 (P25357), hos1 (Q12214)	5	1	0.8 [('TRANSCRIPTION', '5.76e-04'), ('histone deacetylation', '1.37e-08')]	0.8 [('Rpd3L-Expanded complex', '4.19e-09')]	0.4 [('HISTONE DEACETYLASE ACTIVITY', '5.02e-05'), ('transcription coactivator activity', '7.64e-04'), ('transcription corepressor activity', '5.25e-04')]
3263	HERP1/HEY2-NCOR-SIN3A complex	HDAC1 (Q13547), HEY2 (Q9UBP5), NCOR2 (Q9Y618), SIN3A (Q96ST3)	4	HOS2 (P53096), RPD3 (P32561), SIN3 (P22579), SNT1 (P25357), hos1 (Q12214)	5	1	0.8 [('TRANSCRIPTION', '5.76e-04'), ('histone deacetylation', '1.37e-08')]	0.8 [('Rpd3L-Expanded complex', '4.19e-09')]	0.4 [('histone deacetylase activity', '5.02e-05'), ('transcription coactivator activity', '7.64e-04'), ('transcription corepressor activity', '5.25e-04')]
834	20S methylosome and RG-containing Sm protein complex	ANM5 (O14744), ICLN (P54105), RSMB (P14678), SMD1 (P62314), SMD2 (P62316), SMD3 (P62318)	6	RSMB (P40018), SMD1 (Q02260), SMD2 (Q06217), SMD3 (P43321), hsl7 (P38274)	5	1	0.8 [('nuclear mRNA splicing, via spliceosome', '5.99e-07')]	0.8 [('U1 snRNP', '2.57e-09'), ('U4/U6 x U5 tri-snRNP complex', '2.21e-08'), ('U5 snRNP', '1.48e-09')]	0.4 [('mRNA binding', '2.16e-03')]
938	FACT complex, UV-activated	CSK21 (P68400), CSK22 (P19784), CSK2B (P67870), SP16H (Q9Y5B9), SSRP1 (Q08945)	5	CSK21 (P15790), CSK22 (P19454), CSK2B (P43639), CSK2C (P38930), POB3 (Q04636), SPT16 (P32558), rt106 (P40161)	7	1	0.57 [('G1/S transition of mitotic cell cycle', '1.29e-06'), ('G2/M transition of mitotic cell cycle', '4.62e-07'), ('cellular ion homeostasis', '1.30e-08'), ('establishment of cell polarity', '7.55e-07'), ('flocculation via cell wall protein-carbohydrate interaction', '1.95e-10'), ('protein amino acid phosphorylation', '1.05e-04'), ('regulation of transcription from RNA polymerase I promoter', '…	0.57 [('UTP-C complex', '1.95e-10'), ('protein kinase CK2 complex', '1.30e-11')]	0.86 []
2812	RPAP1-RPB2-RPB3 complex	RPAP1 (Q9BWH6), RPB2 (P30876), RPB3 (P19387)	3	RPAC1 (P07703), RPB2 (P08518), RPB3 (P16370), RPC2 (P22276)	4	0	0.5 []	0.5 [('DNA-directed RNA polymerase II, core complex', '1.42e-04'), ('DNA-directed RNA polymerase III complex', '2.92e-04')]	1.0 [('DNA BINDING', '1.15e-05'), ('DNA-DIRECTED RNA POLYMERASE ACTIVITY', '5.56e-09')]
2966	NuMA-LGN-G-alpha-i-1 complex	GNAI1 (P63096), GPSM2 (P81274), NUMA1 (Q14980)	3	GPA1 (P08539), GPA2 (P10823)	2	0	0.5 [('activation of adenylate cyclase activity by G-protein signaling pathway', '1.52e-02'), ('heterotrimeric G-protein complex cycle', '2.27e-02')]	0.5 [('heterotrimeric G-protein complex', '2.27e-02')]	1.0 [('GTP binding', '6.41e-03'), ('GTPase activity', '2.46e-03'), ('signal transducer activity', '4.31e-04')]
631	Tacc1-chTOG-AuroraA complex	CKAP5 (Q14008), STK6 (O14965), TACC1 (O75410)	3	IPL1 (P38991), STU2 (P46675)	2	0	0.5 [('attachment of spindle microtubules to kinetochore', '1.71e-02'), ('mitotic spindle disassembly', '1.14e-02'), ('regulation of cytokinesis', '1.14e-02'), ('spindle checkpoint', '1.14e-02')]	1.0 [('condensed nuclear chromosome kinetochore', '2.73e-04')]	0.5 []
513	TFTC complex (TATA-binding protein-free TAF-II-containing complex)	ATX7 (O15265), GCNL2 (Q92830), SF3B3 (Q15393), SUPT3 (O75486), TAD3L (O75528), TAF10 (Q12962), TAF12 (Q16514), TAF2 (Q6P1X5), TAF4 (O00268), TAF5 (Q15542), TAF5L (O75529), TAF6 (P49848), TAF6L (Q9Y6J9), TAF7 (Q15545), TAF9 (Q16594), TAF9B (Q9HBM6), TRRAP (Q9Y4A5)	17	GCN5 (Q03330), SPT3 (P06844), TAF10 (Q12030), TAF12 (Q03761), TAF5 (P38129), TAF6 (P53040), TAF7 (Q05021), TAF9 (Q05027), TRA1 (P38811), gblp (P38011), rse1 (Q04693), taf2 (P23255)	12	3	0.67 [('histone acetylation', '1.00e-14')]	0.67 [('SAGA complex', '8.80e-16'), ('SLIK (SAGA-like) complex', '8.80e-16')]	0.58 [('general RNA polymerase II transcription factor activity', '2.10e-12')]
1005	RC complex during G2/M-phase of cell cycle	CCNA2 (P20248), CCNB1 (P14635), CDC2 (P06493), DPOD1 (P28340), DPOE1 (Q07864), DPOLA (P09884), PARP1 (P09874), RFA1 (P27694), RFA2 (P15927), RFA3 (P35244), RFC1 (P35251), RFC2 (P35250), TOP1 (P11387)	13	CTF18 (P49956), DPOA (P13382), DPOE (P21951), RFC1 (P38630), RFC2 (P40348), RFC3 (P38629), RFC4 (P40339), RFC5 (P38251), cdc28 (P00546), cg21 (P24868), cg22 (P24869), cg23 (P24870), cg24 (P24871), cgs5 (P30283), cgs6 (P32943), dpod (P15436), dpoz (P14284), kin28 (P06242), rfa1 (P22336), rfa2 (P26754), top1 (P04786)	21	13	0.43 [('cell division', '1.32e-08')]	0.62 [('nucleus', '5.12e-05')]	0.86 [('PROTEIN BINDING', '4.36e-04')]
116	Polycomb repressive complex 1 (PRC1, hPRC-H)	BMI1 (P35226), CBX2 (Q14781), CBX4 (O00257), CBX8 (Q9HC52), HSP71 (P08107), PHC1 (P78364), PHC2 (Q8IXK0), PHC3 (Q8NDX5), RING1 (Q06587), RING2 (Q99496), SCMH1 (Q96GD3), SMCA5 (O60264), TYY1 (P25490)	13	HSP74 (P22202), ISW1 (P38144), ISW2 (Q08773), hsp71 (P10591), hsp72 (P10592), hsp75 (P11484), hsp76 (P40150), yab9 (P31380)	8	5	0.38 [('SRP-dependent cotranslational protein targeting to membrane, translocation', '7.65e-07'), ('response to stress', '8.22e-04')]	0.5 [('plasma membrane enriched fraction', '1.67e-05')]	1.0 [('ATP binding', '1.31e-07')]
190	Mitotic checkpoint complex (MCC)	BUB1B (O60566), BUB3 (O43684), CDC20 (Q12834), MD2L1 (Q13257)	4	BUB3 (P26449), CDC20 (P26309), MAD2 (P40958), MAD3 (P47074), ama1 (P50082), bub1 (P41695), cdh1 (P53197), gle2 (P40066)	8	4	0.63 [('cell division', '4.12e-06')]	0.5 [('mitotic checkpoint complex', '6.50e-12')]	0.75 []
2657	ESR1-CDK7-CCNH-MNAT1-MTA1-HDAC2 complex	CCNH (P51946), CDK7 (P50613), ESR1 (P03372), HDAC2 (Q92769), MAT1 (P51948), MTA1 (Q13330)	6	CCL1 (P37366), KIN28 (P06242), TFB3 (Q03290), hos1 (Q12214), hos2 (P53096), rpd3 (P32561), ssn8 (P47821)	7	4	0.57 [('transcription', '1.56e-03')]	0.43 [('holo TFIIH complex', '1.71e-08')]	0.86 []
424	EXO1-MLH1-PCNA complex	EXO1 (Q9UQ84), MLH1 (P40692), PCNA (P12004)	3	PCNA (P15873), RAD27 (P26793), din7 (Q12086), exo1 (P39875), mlh1 (P38920), mlh3 (Q12083)	6	4	0.33 [('MISMATCH REPAIR', '9.13e-04'), ('meiotic mismatch repair', '1.50e-04'), ('reciprocal meiotic recombination', '2.97e-03')]	0.67 []	0.83 []
3060	RNA polymerase II complex (RPB1, RAP74, CDK8, CYCC, SRB7, BAF190, BAF47), chromatin structure modifying	CCNC (P24863), CDK8 (P49336), MED21 (Q13503), RPB1 (P24928), SMCA2 (P51531), SMCA4 (P51532), SNF5 (Q12824), T2FA (P35269)	8	RPB1 (P04050), SSN3 (P39073), SSN8 (P47821), ccl1 (P37366), rpa1 (P10964), rpc1 (P04051)	6	3	0.67 [('TRANSCRIPTION', '9.37e-04')]	0.33 [('transcription factor complex', '9.02e-05')]	0.83 []
1147	Polyadenylation complex (CSTF1, CSTF2, CSTF3, SYMPK CPSF1, CPSF2, CPSF3)	CPSF1 (Q10570), CPSF2 (Q9P2I0), CPSF3 (Q9UKF6), CSTF1 (Q05048), CSTF2 (P33240), CSTF3 (Q12996), SYMPK (Q92797)	7	CFT1 (Q06632), CFT2 (Q12102), RNA14 (P25298), RNA15 (P25299), YSH1 (Q06224), ist3 (P40565)	6	1	0.83 [('mRNA cleavage', '2.99e-11'), ('mRNA polyadenylation', '6.02e-12')]	0.5 [('mRNA cleavage and polyadenylation specificity factor complex', '1.48e-06')]	0.5 [('RNA binding', '8.37e-03')]
433	BASC complex (BRCA1-associated genome surveillance complex)	ATM (Q13315), BLM (P54132), BRCA1 (P38398), MLH1 (P40692), MRE11 (P49959), MSH2 (P43246), MSH6 (P52701), NBN (O60934), RAD50 (Q92878), RFC1 (P35251), RFC2 (P35250), RFC4 (P35249)	12	CTF18 (P49956), RFC1 (P38630), RFC2 (P40348), RFC3 (P38629), RFC4 (P40339), RFC5 (P38251), atm (P38110), atr (P38111), mlh1 (P38920), mlh3 (Q12083), mre11 (P32829), msh1 (P25846), msh2 (P25847), msh3 (P25336), msh4 (P40965), msh6 (Q03834), rad50 (P12753), sgs1 (P35187)	18	12	0.44 [('mismatch repair', '8.80e-16')]	0.39 [('mitochondrion', '4.33e-03')]	1.0 [('protein binding', '2.29e-06')]
2183	Kaiso-NCOR complex	COR2A (Q92828), GPS2 (Q13227), HDAC3 (O15379), JHD3A (O75164), KAISO (Q86T24), KIF11 (P52732), NCOR1 (O75376), TBL1R (Q9BZK7), TBL1X (O60907), TRI33 (Q9UPN9)	10	HOS2 (P53096), RPD3 (P32561), SIF2 (P38262), SNT1 (P25357), coro (Q06440), hos1 (Q12214)	6	2	0.67 [('histone deacetylation', '1.75e-08')]	0.67 [('Rpd3L-Expanded complex', '5.38e-09')]	0.5 []
15	NCOR complex	COR2A (Q92828), GPS2 (Q13227), HDAC3 (O15379), NCOR1 (O75376), TBL1R (Q9BZK7), TBL1X (O60907)	6	HOS2 (P53096), RPD3 (P32561), SIF2 (P38262), SNT1 (P25357), coro (Q06440), hos1 (Q12214)	6	2	0.67 [('histone deacetylation', '1.75e-08')]	0.67 [('Rpd3L-Expanded complex', '5.38e-09')]	0.5 []
5755	SUMO1-SUA1-UBA2 complex	SAE1 (Q9UBE0), SAE2 (Q9UBT2), SUMO1 (P63165)	3	RHC31 (Q06624), UBA2 (P52488), smt3 (Q12306), uba3 (Q99344), uba4 (P38820)	5	3	0.8 [('MODIFICATION-DEPENDENT PROTEIN CATABOLIC PROCESS', '2.62e-07')]	0.4 [('SUMO activating enzyme complex', '3.59e-06')]	0.6 []
486	WIP-WASp-actin-myosin-IIa complex	ACTA (P62736), MRLC3 (P19105), MYH9 (P35579), MYL6 (P60660), WASP (P42768), WIPF1 (O43516)	6	ACT (P60010), MLC1 (P53141), MYO1 (P08964), las17 (Q12446), vrp1 (P37370)	5	2	0.6 [('endocytosis', '1.17e-04')]	0.6 [('actin cortical patch', '3.35e-05'), ('cellular bud neck', '4.11e-04')]	0.6 [('identical protein binding', '2.49e-02')]
643	CtBP core complex	CTBP1 (Q13363), CTBP2 (P56545), EHMT1 (Q9H9B1), EHMT2 (Q96KQ7), HDAC1 (Q13547), HDAC2 (Q92769), LSD1 (O60341), RCOR1 (Q9UKL0), ZEB1 (P37275)	9	HOS2 (P53096), RPD3 (P32561), fdh1 (Q08911), fdh2 (Q08987), hos1 (Q12214), ser33 (P40510), sera (P40054), yn14 (P53839)	8	6	0.63 [('oxidation reduction', '1.42e-05')]	0.5 []	0.63 [('NAD or NADH binding', '9.96e-11')]
5589	LINC complex, S-phase	LIN37 (Q96GY3), LIN52 (Q52LA3), LIN54 (Q6MZP7), LIN9 (Q5TKA1), MYBB (P10244), RBBP4 (Q09028), RBL1 (P28749)	7	HAT2 (P39984), cef1 (Q03654), msi1 (P13712), rrb1 (Q04225)	4	3	0.5 [('DNA repair', '4.52e-03')]	0.75 []	0.5 []
66	TRAP complex	MED1 (Q15648), MED12 (Q93074), MED14 (O60244), MED16 (Q9Y2X0), MED17 (Q9NVC6), MED24 (O75448), THA (P10827), TR150 (Q9Y2W1)	8	NAB2 (P32505), ixr1 (P33417), mss11 (Q03825), ykf4 (P35732)	4	3	0.5 []	0.75 []	0.5 []
5165	AP1G1-PACS1-FURIN complex	AP1G1 (O43747), FURIN (P09958), PACS1 (Q6VY07)	3	AP2A (P38065), AP3D (Q08951), ap1g1 (Q12028), kex2 (P13134)	4	2	0.75 [('intracellular protein transport', '6.65e-05')]	0.25 []	0.75 [('protein transporter activity', '5.08e-06')]
1307	Multiprotein complex (mRNA turnover)	CSDE1 (O75534), HNRPD (Q14103), HNRPQ (O60506), PABP1 (P11940), PAIP1 (Q9H074)	5	HSH49 (Q99181), PABP (P04147), hrp1 (Q99383), mip6 (P38760)	4	2	0.25 []	0.5 [('stress granule', '4.51e-04')]	1.0 [('nucleotide binding', '1.73e-07')]
2129	DNAJB2-HSPA8-PSMA3 complex	DNJB2 (P25686), HSP7C (P11142), PSA3 (P25788)	3	PSA3 (P21242), PSA6 (P21243), grp78 (P16474), hsp71 (P10591), hsp72 (P10592), hsp73 (P09435), hsp74 (P22202), hsp75 (P11484), hsp76 (P40150), hsp77 (P12398), hsp7e (P39987)	11	9	0.45 [('SRP-dependent cotranslational protein targeting to membrane, translocation', '8.51e-12'), ('response to stress', '1.94e-06')]	0.45 []	0.82 [('ATP binding', '8.31e-07'), ('unfolded protein binding', '3.00e-15')]
728	CSA-POLIIa complex	CSN1 (Q13098), CSN2 (P61201), CSN3 (Q9UNS2), CSN4 (Q9BT78), CSN5 (Q92905), CSN6 (Q7L5N1), CSN7A (Q9UBW8), CSN7B (Q9H9Q2), CSN8 (Q99627), CUL4A (Q13619), DDB1 (Q16531), ERCC8 (Q13216), RBX1 (P62877), RPB1 (P24928)	14	CSN5 (Q12468), RPN11 (P43588), RPN5 (Q12250), RPN6 (Q12377), RPN7 (Q06103), RPN8 (Q08723), cul3 (P53202), rad28 (Q12021), rbx1 (Q08273), rpa1 (P10964), rpc1 (P04051)	11	5	0.45 [('ubiquitin-dependent protein catabolic process', '7.12e-07')]	0.45 [('proteasome regulatory particle, lid subcomplex', '1.36e-11')]	0.82 []
3061	RNA polymerase II complex (CBP, PCAF, RPB1, BAF47, CYCC, CDK8), chromatin structure modifying	CBP (Q92793), CCNC (P24863), CDK8 (P49336), PCAF (Q92831), RPB1 (P24928), SNF5 (Q12824)	6	GCN5 (Q03330), RPB1 (P04050), SSN3 (P39073), SSN8 (P47821), ccl1 (P37366), rpa1 (P10964), rpc1 (P04051)	7	3	0.71 [('TRANSCRIPTION', '8.37e-05')]	0.29 [('transcription factor complex', '1.26e-04')]	0.71 []
5199	Kinase maturation complex 1	1433B (P31946), 1433E (P62258), 1433F (Q04917), 1433G (P61981), 1433T (P27348), 1433Z (P63104), CDC37 (Q16543), HS90A (P07900), HS90B (P08238), HSP74 (P34932), M3K3 (Q99759), MARK2 (Q7KZI7), MP2K5 (Q13163), PDRG1 (Q9NUG6), PFD2 (Q9UHV9), TRAF7 (Q6Q0C0)	16	BMH1 (P29311), BMH2 (P34730), bck1 (Q01389), hsc82 (P15108), hsp79 (P32590), hsp7f (P32589), hsp82 (P02829), mkk1 (P32490), mkk2 (P32491), pfd2 (P40005), ste11 (P23561), ste7 (P06784)	12	10	0.33 [('protein amino acid phosphorylation', '4.52e-04'), ('pseudohyphal growth', '2.44e-05')]	0.58 [('cytoplasm', '2.41e-02')]	0.75 [('ATP BINDING', '2.38e-06')]
5609	Emerin regulatory complex	ACTB (P60709), BAF (O75531), EMD (P50402), H11 (Q02539), H31 (P68431), HDAC1 (Q13547), HDAC3 (O15379), LMO7 (Q8WWI1), RBL1 (P28749)	9	ACT (P60010), ARP4 (P80428), ARP5 (P53946), arp1 (P38696), arp2 (P32381), arp7 (Q12406), hos1 (Q12214), hos2 (P53096), rpd3 (P32561)	9	6	0.56 [('transcription', '4.50e-04')]	0.33 [('Ino80 complex', '3.00e-06')]	0.78 []
4997	p97/VCP-VIMP-DERL1 complex	DERL1 (Q9BUN8), SELS (Q9BQE4), TERA (P55072)	3	PEX1 (P24004), PEX6 (P33760), afg2 (P32794), cdc48 (P25694), rix7 (Q07844), tbp7 (P40340)	6	4	0.33 [('protein import into peroxisome matrix, receptor recycling', '8.60e-05')]	0.33 [('membrane fraction', '1.34e-02'), ('peroxisome', '3.45e-03'), ('soluble fraction', '7.98e-03')]	1.0 [('ATP binding', '1.96e-05')]
4977	gp78-p97/VCP-DERL1 complex	AMFR2 (Q9UKV5), DERL1 (Q9BUN8), TERA (P55072)	3	PEX1 (P24004), PEX6 (P33760), afg2 (P32794), cdc48 (P25694), rix7 (Q07844), tbp7 (P40340)	6	4	0.33 [('protein import into peroxisome matrix, receptor recycling', '8.60e-05')]	0.33 [('membrane fraction', '1.34e-02'), ('peroxisome', '3.45e-03'), ('soluble fraction', '7.98e-03')]	1.0 [('ATP binding', '1.96e-05')]
105	Polycomb repressive complex 2 (PRC 2)	EED (O75530), EZH2 (Q15910), RBBP4 (Q09028), RBBP7 (Q16576), SUZ12 (Q15022)	5	HAT2 (P39984), msi1 (P13712), rrb1 (Q04225)	3	2	0.67 [('DNA repair', '4.57e-03')]	0.67 []	0.33 [('histone acetyltransferase activity', '2.04e-02')]
1163	ING1-PCNA complex	ING1 (Q9UK53), PCNA (P12004)	2	YNG2 (P38806), pcna (P15873), yng1 (Q08465)	3	2	0.67 [('histone acetylation', '1.50e-03')]	0.33 [('PCNA COMPLEX', '5.12e-03'), ('Piccolo NuA4 histone acetyltransferase complex', '1.53e-02')]	0.67 [('methylated histone residue binding', '6.97e-05')]
1160	ING1-p300-PCNA complex	EP300 (Q09472), ING1 (Q9UK53), PCNA (P12004)	3	YNG2 (P38806), pcna (P15873), yng1 (Q08465)	3	2	0.67 [('histone acetylation', '1.50e-03')]	0.33 [('PCNA COMPLEX', '5.12e-03'), ('Piccolo NuA4 histone acetyltransferase complex', '1.53e-02')]	0.67 [('methylated histone residue binding', '6.97e-05')]
5608	Emerin architectural complex	ACTB (P60709), EMD (P50402), LMNA (P02545), LMNB1 (P20700), NMI (Q13287), SPTA2 (Q13813)	6	ACT (P60010), ARP4 (P80428), ARP5 (P53946), arp1 (P38696), arp2 (P32381), arp7 (Q12406)	6	3	0.33 [('ascospore wall assembly', '7.34e-03'), ('chromatin remodeling', '4.42e-03'), ('establishment of mitotic spindle orientation', '6.49e-04'), ('histone acetylation', '9.07e-03'), ('mitochondrion inheritance', '5.43e-03')]	0.5 [('Ino80 complex', '1.97e-06')]	0.83 []
236	WICH complex	BAZ1B (Q9UIG0), SMCA5 (O60264)	2	ISW1 (P38144), ISW2 (Q08773), ITC1 (P53125), rad26 (P40352), yab9 (P31380), yfk8 (P43610)	6	3	0.33 [('ATP-DEPENDENT CHROMATIN REMODELING', '1.79e-03'), ('NUCLEOSOME POSITIONING', '8.60e-05'), ('chromatin silencing at telomere', '1.29e-02'), ('negative regulation of transcription from RNA polymerase II promoter by pheromones', '1.29e-04')]	0.5 []	0.83 [('ATP binding', '9.18e-04'), ('helicase activity', '1.63e-11')]
2254	CTGF/Hcs24-actin complex	ACTB (P60709), ACTG (P63261), CTGF (P29279)	3	ACT (P60010), ARP4 (P80428), ARP5 (P53946), arp1 (P38696), arp2 (P32381), arp7 (Q12406)	6	3	0.33 [('ascospore wall assembly', '7.34e-03'), ('chromatin remodeling', '4.42e-03'), ('establishment of mitotic spindle orientation', '6.49e-04'), ('histone acetylation', '9.07e-03'), ('mitochondrion inheritance', '5.43e-03')]	0.5 [('Ino80 complex', '1.97e-06')]	0.83 []
5606	Emerin-actin-NMI-(alphaII)spectrin complex	ACTB (P60709), EMD (P50402), NMI (Q13287), SPTA2 (Q13813)	4	ACT (P60010), ARP4 (P80428), ARP5 (P53946), arp1 (P38696), arp2 (P32381), arp7 (Q12406)	6	3	0.33 [('ascospore wall assembly', '7.34e-03'), ('chromatin remodeling', '4.42e-03'), ('establishment of mitotic spindle orientation', '6.49e-04'), ('histone acetylation', '9.07e-03'), ('mitochondrion inheritance', '5.43e-03')]	0.5 [('Ino80 complex', '1.97e-06')]	0.83 []
769	Exon junction complex (EIF4A3-MLN51-MAGOH-Y14), RNA-protein complex	CASC3 (O15234), IF4A3 (P38919), MGN (P61326), RBM8A (Q9Y5S9)	4	FAL1 (Q12099), IF4A (P10081), dhh1 (P39517)	3	1	0.33 []	0.33 []	1.0 [('RNA binding', '1.87e-03')]
772	eIF4AIII-Btz complex	CASC3 (O15234), IF4A3 (P38919)	2	FAL1 (Q12099), IF4A (P10081), dhh1 (P39517)	3	1	0.33 []	0.33 []	1.0 [('RNA binding', '1.87e-03')]
1751	SMN complex	DDX20 (Q9UHI6), GEMI2 (O14893), GEMI4 (P57678), GEMI5 (Q8TEQ6), GEMI6 (Q8WXD5), GEMI7 (Q9H840), RSMB (P14678), SMN (Q16637), SNRPA (P09012), STRAP (Q9Y3F4)	10	MSL1 (P40567), RSMB (P40018), eif3i (P40217)	3	1	0.67 [('nuclear mRNA splicing, via spliceosome', '3.23e-03')]	0.33 []	0.67 []
2755	17S U2 snRNP	CH60 (P10809), CHERP (Q8IWX8), DDX46 (Q7L014), DHX15 (O43143), DNJC8 (O75937), HM20B (Q9P0W2), PHF5A (Q7RTV0), PM14 (Q9Y3B4), PUF60 (Q9UHX1), RSMB (P14678), RU2A (P09661), RU2B (P08579), RUXE (P62304), RUXF (P62306), RUXG (P62308), SF3A1 (Q15459), SF3A2 (Q15428), SF3A3 (Q12874), SF3B1 (O75533), SF3B2 (Q13435), SF3B3 (Q15393), SF3B4 (Q15427), SF3B5 (Q9BWJ5), SFRS1 (Q07955), SMD1 (P62314), SMD2 (P6…	33	CUS1 (Q02554), HSH49 (Q99181), MSL1 (P40567), PRP11 (Q07350), PRP21 (P32524), PRP43 (P53131), PRP9 (P19736), RSE1 (Q04693), RSMB (P40018), RUXE (Q12330), RUXF (P54999), RUXG (P40204), SF3B1 (P49955), SMD1 (Q02260), SMD2 (Q06217), SMD3 (P43321), dbp10 (Q12389), prp5 (P21372), rds3 (Q06835), rok1 (P45818)	20	4	0.6 [('NUCLEAR MRNA SPLICING, VIA SPLICEOSOME', '8.80e-16')]	0.45 [('U2 snRNP', '8.80e-16')]	0.6 [('RNA BINDING', '5.39e-11')]
2731	Set1A complex	ASH2L (Q9UBL3), CCNY (Q8ND76), RBBP5 (Q15291), SET1A (O15047), WDR5 (P61964), WDR82 (Q6UXN9)	6	SET1 (P38827), SWD1 (P39706), SWD2 (P36104), SWD3 (P38123), copa (P53622), pfs2 (P42841), prp46 (Q12417), pwp2 (P25635), tup1 (P16649), utp13 (Q05946), ycw2 (P25382)	11	7	0.36 [('histone H3-K4 methylation', '5.12e-09'), ('telomere maintenance', '5.06e-07')]	0.36 [('Set1C/COMPASS complex', '2.85e-09')]	0.91 [('protein binding', '8.94e-03')]
247	RalBP1-CCNB1-AP2A-NUMB-EPN1 complex	AP2A1 (O95782), AP2A2 (O94973), CCNB1 (P14635), EPN1 (Q9Y6I3), NUMB (P49757), RBP1 (Q15311)	6	AP2A (P38065), ap1g1 (Q12028), ent1 (Q12518), ent2 (Q05785), ent4 (Q07872)	5	4	0.4 [('ENDOCYTOSIS', '1.23e-02'), ('actin cortical patch assembly', '1.93e-04'), ('actin filament organization', '3.15e-03'), ('intracellular protein transport', '7.46e-03')]	0.6 [('actin cortical patch', '5.03e-05')]	0.6 [('clathrin binding', '2.05e-07')]
1159	p33ING1b-HDAC1 complex	HDAC1 (Q13547), ING1 (Q9UK53)	2	HOS2 (P53096), RPD3 (P32561), hos1 (Q12214), yng1 (Q08465), yng2 (P38806)	5	3	0.8 [('transcription', '4.94e-04')]	0.4 [('Rpd3L-Expanded complex', '7.32e-04')]	0.4 [('histone deacetylase activity', '4.30e-05'), ('methylated histone residue binding', '1.55e-04')]
2626	CCNC-CDK8-MED1-MED6-MED7 xcomplex	CCNC (P24863), CDK8 (P49336), MED1 (Q15648), MED6 (O75586), MED7 (O43513)	5	MED6 (P38782), MED7 (Q08278), SSN3 (P39073), SSN8 (P47821), ccl1 (P37366)	5	1	0.4 [('meiosis', '1.66e-02'), ('negative regulation of transcription from RNA polymerase II promoter', '4.90e-03'), ('regulation of transcription from RNA polymerase II promoter', '1.25e-02'), ('transcription from RNA polymerase II promoter', '5.57e-03')]	0.4 [('transcription factor complex', '1.05e-04')]	0.8 []
228	SMCC complex	CCNC (P24863), CDK8 (P49336), MED1 (Q15648), MED14 (O60244), MED21 (Q13503), MED24 (O75448), MED31 (Q9Y3C7), MED6 (O75586)	8	MED31 (P38633), MED6 (P38782), SSN3 (P39073), SSN8 (P47821), ccl1 (P37366)	5	1	0.4 [('meiosis', '1.42e-02'), ('negative regulation of transcription from RNA polymerase II promoter', '4.20e-03'), ('transcription from RNA polymerase II promoter', '4.78e-03')]	0.4 [('transcription factor complex', '9.03e-05')]	0.8 []
234	HuCHRAC complex	BAZ1A (Q9NRL2), CHRC1 (Q9NRG0), DPOE3 (Q9NRF9), SMCA5 (O60264)	4	ISW1 (P38144), ISW2 (Q08773), ITC1 (P53125), rad26 (P40352), spt7 (P35177), yab9 (P31380), yfk8 (P43610)	7	4	0.43 []	0.43 []	0.71 [('ATP binding', '1.45e-03'), ('helicase activity', '2.85e-11')]
3137	MASH1 promoter-coactivator complex	CBP (Q92793), H31 (P68431), H32 (Q71DI3), H33 (P84243), H4 (P62805), HES1 (Q14469), NONO (Q15233), PARP1 (P09874), PCAF (Q92831), RPB1 (P24928), SRC (P12931)	11	CENPA (P36012), H3 (P61830), H4 (P02309), gcn5 (Q03330), rpa1 (P10964), rpb1 (P04050), rpc1 (P04051)	7	4	0.43 [('NUCLEOSOME ASSEMBLY', '8.71e-06')]	0.43 [('nuclear nucleosome', '3.19e-07')]	0.71 [('DNA BINDING', '6.97e-06')]
94	ATP-utilizing chromatin assembly and remodeling factor (hACF) complex	BAZ1A (Q9NRL2), SMCA5 (O60264)	2	ISW1 (P38144), ISW2 (Q08773), ITC1 (P53125), rad26 (P40352), spt7 (P35177), yab9 (P31380), yfk8 (P43610)	7	4	0.43 []	0.43 []	0.71 [('ATP binding', '1.45e-03'), ('helicase activity', '2.85e-11')]
1191	RNA pol II containing coactivator complex Tat-SF	CDK9 (P50750), HTSF1 (O43719), NUCL (P19338), RPB1 (P24928), SPT5H (O00267)	5	RPA1 (P10964), RPB1 (P04050), RPC1 (P04051), SPT5 (P27692), ctk1 (Q03957), ifh1 (P39520), yn26 (P53830)	7	3	0.43 []	0.29 []	0.86 []
2224	MSH2/6-BLM-p53-RAD51 complex	BLM (P54132), MSH2 (P43246), MSH6 (P52701), P53 (P04637), RAD51 (Q06609)	5	MSH2 (P25847), MSH3 (P25336), MSH6 (Q03834), SGS1 (P35187), dmc1 (P25453), msh1 (P25846), msh4 (P40965), rad51 (P25454), rad57 (P25301)	9	5	0.33 [('meiotic mismatch repair', '1.34e-06'), ('telomere maintenance via recombination', '1.33e-05')]	0.22 [('MutSalpha complex', '1.81e-05'), ('MutSbeta complex', '1.81e-05'), ('condensed nuclear chromosome', '1.63e-03'), ('nuclear chromosome', '1.63e-03')]	1.0 [('ATP BINDING', '2.63e-08')]
2573	Class C VPS/HOPS complex	EEA1 (Q15075), RAB5A (P20339), VPS11 (Q9H270), VPS16 (Q9H269), VPS18 (Q9P253), VPS39 (Q96JC1)	6	VPS21 (P36017), YPT10 (P38146), YPT52 (P36018), imh1 (Q06704), mlp2 (P40457), nuf1 (P32380), rad50 (P12753), slk19 (Q08581), ypt53 (P36019)	9	6	0.44 [('small GTPase mediated signal transduction', '2.05e-06')]	0.33 [('late endosome', '6.18e-06')]	0.78 []
2825	BRCA1-RNA polymerase II complex	BRCA1 (P38398), ERCC2 (P18074), ERCC3 (P19447), MED21 (Q13503), RPAB1 (P19388), RPAB2 (P61218), RPAB3 (P52434), RPAB4 (P53803), RPAB5 (P62875), RPB1 (P24928), RPB11 (P52435), RPB2 (P30876), RPB3 (P19387), RPB4 (O15514), RPB7 (P62487), RPB9 (P36954), T2EA (P29083), T2EB (P29084), T2FA (P35269), T2FB (P13984), TBP (P20226), TF2B (Q00403), TF2H1 (P32780), TF2H2 (Q13888), TF2H3 (Q13889), TF2H4 (Q9275…	26	RPA1 (P10964), RPAB1 (P20434), RPAB2 (P20435), RPAB3 (P20436), RPAB5 (P22139), RPAC1 (P07703), RPAC2 (P28000), RPB1 (P04050), RPB11 (P38902), RPB2 (P08518), RPB3 (P16370), RPB4 (P20433), RPB7 (P34087), RPB9 (P27999), RPC1 (P04051), RPC2 (P22276), rad25 (Q00578), rad3 (P06839), ssl1 (Q04673), t2ea (P36100), tbp (P13393), tf2b (P29055), tfb1 (P32776), tfb2 (Q02939), tfb4 (Q12004)	25	9	0.44 [('transcription from RNA polymerase II promoter', '6.60e-16')]	0.44 [('DNA-directed RNA polymerase II, core complex', '6.60e-16')]	0.64 [('DNA-directed RNA polymerase activity', '6.60e-16')]
280	HMGB1-HMGB2-HSC70-ERP60-GAPDH complex	G3P (P04406), HMGB1 (P09429), HMGB2 (P26583), HSP7C (P11142), PDIA3 (P30101)	5	G3P1 (P00360), G3P2 (P00358), GRP78 (P16474), g3p3 (P00359), hsp71 (P10591), hsp72 (P10592), hsp73 (P09435), hsp74 (P22202), hsp75 (P11484), hsp76 (P40150), hsp77 (P12398), hsp7e (P39987), nhp6a (P11632), nhp6b (P11633)	14	11	0.36 [('SRP-dependent cotranslational protein targeting to membrane, translocation', '3.68e-11'), ('response to stress', '8.10e-06')]	0.5 [('plasma membrane enriched fraction', '3.43e-09')]	0.64 [('ATP binding', '2.18e-05'), ('unfolded protein binding', '1.06e-13')]
1458	SNF2h-HDAC12 complex	HDAC2 (Q92769), SMCA5 (O60264)	2	HOS2 (P53096), RPD3 (P32561), hos1 (Q12214), isw1 (P38144), isw2 (Q08773), rad26 (P40352), yab9 (P31380), yfk8 (P43610)	8	6	0.5 [('transcription', '3.94e-03')]	0.38 []	0.63 [('ATP binding', '3.50e-03'), ('helicase activity', '7.60e-11')]
649	HDAC1-associated core complex cII	CHD3 (Q12873), HDAC1 (Q13547), MBD2 (Q9UBB5), MBD3 (O95983), MTA2 (O94776), P66A (Q86YP4), P66B (Q8WXI9), RBBP4 (Q09028), RBBP7 (Q16576), RCOR1 (Q9UKL0)	10	HOS2 (P53096), RPD3 (P32561), hat2 (P39984), hos1 (Q12214), msi1 (P13712), rrb1 (Q04225)	6	4	0.5 [('TRANSCRIPTION', '1.40e-02')]	0.5 []	0.5 []
685	MeCP1 complex	CHD4 (Q14839), HDAC1 (Q13547), HDAC2 (Q92769), MBD2 (Q9UBB5), MBD3 (O95983), MTA2 (O94776), P66B (Q8WXI9), RBBP4 (Q09028), RBBP7 (Q16576)	9	HOS2 (P53096), RPD3 (P32561), hat2 (P39984), hos1 (Q12214), msi1 (P13712), rrb1 (Q04225)	6	4	0.5 [('TRANSCRIPTION', '1.40e-02')]	0.5 []	0.5 []
1495	PID complex	CHD4 (Q14839), HDAC1 (Q13547), MBD3 (O95983), MTA2 (O94776), RBBP4 (Q09028)	5	HOS2 (P53096), RPD3 (P32561), hat2 (P39984), hos1 (Q12214), msi1 (P13712), rrb1 (Q04225)	6	4	0.5 [('TRANSCRIPTION', '1.40e-02')]	0.5 []	0.5 []
5873	RAF1-MAP2K1-YWHAE complex	1433E (P62258), MP2K1 (Q02750), RAF1 (P04049)	3	BMH1 (P29311), BMH2 (P34730), mkk1 (P32490), mkk2 (P32491), pbs2 (P08018), ste7 (P06784)	6	4	0.5 [('protein amino acid phosphorylation', '1.79e-03'), ('pseudohyphal growth', '1.97e-04')]	0.33 [('cellular bud tip', '1.90e-02')]	0.67 [('ATP binding', '1.81e-02'), ('PROTEIN SERINE/THREONINE KINASE ACTIVITY', '9.67e-06')]
614	NRD complex (Nucleosome remodeling and deacetylation complex)	CHD3 (Q12873), CHD4 (Q14839), HDAC1 (Q13547), HDAC2 (Q92769), LSD1 (O60341), MTA1 (Q13330), RBBP4 (Q09028)	7	HOS2 (P53096), RPD3 (P32561), hat2 (P39984), hos1 (Q12214), msi1 (P13712), rrb1 (Q04225)	6	4	0.5 [('TRANSCRIPTION', '1.40e-02')]	0.5 []	0.5 []
5877	MAP2K1-BRAF-RAF1-YWHAE-KSR1 complex	1433E (P62258), BRAF1 (P15056), KSR1 (Q8IVT5), MP2K1 (Q02750), RAF1 (P04049)	5	BMH1 (P29311), BMH2 (P34730), mkk1 (P32490), mkk2 (P32491), pbs2 (P08018), ste7 (P06784)	6	4	0.5 [('PROTEIN AMINO ACID PHOSPHORYLATION', '1.79e-03'), ('pseudohyphal growth', '1.97e-04')]	0.33 [('cellular bud tip', '1.90e-02')]	0.67 [('ATP BINDING', '1.81e-02'), ('PROTEIN SERINE/THREONINE KINASE ACTIVITY', '9.67e-06')]
1332	Large Drosha complex	DDX1 (Q92499), DDX17 (Q92841), DDX3X (O00571), DDX5 (P17844), DGCR8 (Q8WYQ5), DHX15 (O43143), EWS (Q01844), FUS (P35637), HNRDL (O14979), HNRH1 (P31943), HNRL1 (Q9BUJ2), HNRPM (P52272), HNRPU (Q00839), ILF2 (Q12905), ILF3 (Q12906), RALY (Q9UKM9), RBP56 (Q92804), RNC (Q9NRR4), SRPK1 (Q96SB4), TADBP (Q13148)	20	DBP2 (P24783), DED1 (P06634), FBRL (P15646), dbp1 (P24784), dbp3 (P20447), nop3 (Q01560), prp43 (P53131), prp5 (P21372)	8	5	0.38 [('rRNA processing', '8.08e-04')]	0.38 []	0.75 [('ATP binding', '1.67e-04')]
5184	SWI/SNF chromatin-remodeling complex	HDAC1 (Q13547), MECP2 (P51608), SIN3A (Q96ST3), SMCA2 (P51531), SMCE1 (Q969G3)	5	HOS2 (P53096), RPD3 (P32561), SIN3 (P22579), hos1 (Q12214), mot1 (P32333), snf2 (P22082), sth1 (P32597), yab9 (P31380)	8	5	0.63 [('TRANSCRIPTION', '2.64e-04')]	0.38 [('Rpd3L-Expanded complex', '1.10e-05')]	0.5 [('helicase activity', '4.16e-08')]
49	DNMT3B complex	DNM3B (Q9UBC3), HDAC1 (Q13547), KIF4A (O95239), SIN3A (Q96ST3), SMC2 (O95347), SMC4 (Q9NTJ3), SMCA5 (O60264)	7	HOS2 (P53096), RPD3 (P32561), SIN3 (P22579), hos1 (Q12214), isw1 (P38144), isw2 (Q08773), rad26 (P40352), yab9 (P31380)	8	5	0.63 [('transcription', '2.64e-04')]	0.38 [('Rpd3L-Expanded complex', '1.10e-05')]	0.5 [('helicase activity', '4.16e-08')]
189	BAF complex	ACL6A (O96019), ACL6B (O94805), ACTB (P60709), ACTG (P63261), ARI1A (O14497), ARI1B (Q8NFD5), SMCA2 (P51531), SMCA4 (P51532), SMCE1 (Q969G3), SMRC1 (Q92922), SMRC2 (Q8TAQ2), SMRD1 (Q96GM5), SNF5 (Q12824)	13	ARP7 (Q12406), MOT1 (P32333), RSC8 (P43609), SFH1 (Q06168), SNF2 (P22082), STH1 (P32597), SWI3 (P32591), act (P60010), arp1 (P38696), arp2 (P32381), arp4 (P80428), arp5 (P53946), yab9 (P31380), ybv8 (P38266)	14	7	0.43 [('ATP-dependent chromatin remodeling', '1.60e-11')]	0.29 [('RSC complex', '2.17e-07')]	0.79 []
438	GCN5-TRRAP histone acetyltransferase complex	BRCA1 (P38398), GCNL2 (Q92830), MSH2 (P43246), MSH6 (P52701), SUPT3 (O75486), TAD3L (O75528), TAF10 (Q12962), TAF5L (O75529), TAF9 (Q16594), TRRAP (Q9Y4A5)	10	GCN5 (Q03330), SPT3 (P06844), TAF10 (Q12030), TAF5 (P38129), TAF9 (Q05027), TRA1 (P38811), gblp (P38011), msh1 (P25846), msh2 (P25847), msh3 (P25336), msh4 (P40965), msh6 (Q03834)	12	6	0.5 [('histone acetylation', '4.58e-10')]	0.5 [('SAGA complex', '4.72e-12'), ('SLIK (SAGA-like) complex', '1.51e-12')]	0.5 []
2234	Chromatin assembly complex (CAF-1 complex)	CAF1A (Q13111), CAF1B (Q13112), RBBP4 (Q09028)	3	CAC1 (Q12495), CAC2 (Q04199), MSI1 (P13712), hat2 (P39984), hir1 (P32479), rrb1 (Q04225)	6	3	0.5 [('DNA repair', '4.67e-04'), ('nucleosome assembly', '7.48e-06')]	0.5 [('CAF-1 complex', '4.90e-09'), ('chromosome, centromeric region', '1.71e-07')]	0.5 [('transcription regulator activity', '9.83e-06')]
1231	FIB-associated protein complex	ANM1 (Q99873), ANM5 (O14744), C1QBP (Q07021), FBRL (P22087), TBA1A (Q71U36), TBB1 (Q9H4B7)	6	TBA1 (P09733), TBA3 (P09734), fbrl (P15646), hmt1 (P38074)	4	2	0.5 [('PROTEIN POLYMERIZATION', '6.03e-05'), ('homologous chromosome segregation', '6.03e-05'), ('mitotic sister chromatid segregation', '2.78e-03'), ('nuclear migration during conjugation with cellular fusion', '1.69e-04')]	0.5 [('PROTEIN COMPLEX', '1.27e-04'), ('cytoplasmic microtubule', '4.69e-04'), ('kinetochore microtubule', '1.27e-04'), ('nuclear microtubule', '1.27e-04'), ('polar microtubule', '1.81e-05'), ('spindle pole body', '7.01e-03')]	0.5 [('GTPase activity', '1.02e-02'), ('structural constituent of cytoskeleton', '5.91e-03')]
5269	TNF-alpha/NF-kappa B signaling complex 8	CDC37 (Q16543), FKBP5 (Q13451), HS90A (P07900), HS90B (P08238), IKKE (Q14164), KTN1 (Q86UP2)	6	HSC82 (P15108), HSP82 (P02829), fkbp3 (P38911), fkbp4 (Q06205)	4	2	0.75 [('PROTEIN FOLDING', '8.86e-05')]	0.25 []	0.5 [('UNFOLDED PROTEIN BINDING', '1.11e-02'), ('macrolide binding', '1.29e-05'), ('peptidyl-prolyl cis-trans isomerase activity', '5.15e-04')]
5268	TNF-alpha/NF-kappa B signaling complex 7	CDC37 (Q16543), FKBP5 (Q13451), HS90A (P07900), HS90B (P08238), M3K7 (O43318), TAB1 (Q15750), TAB2 (Q9NYJ8), TAB3 (Q8N5C8)	8	HSC82 (P15108), HSP82 (P02829), fkbp3 (P38911), fkbp4 (Q06205)	4	2	0.75 [('PROTEIN FOLDING', '8.86e-05')]	0.25 []	0.5 [('UNFOLDED PROTEIN BINDING', '1.11e-02'), ('macrolide binding', '1.29e-05'), ('peptidyl-prolyl cis-trans isomerase activity', '5.15e-04')]
785	Exon junction complex	IF4A3 (P38919), MGN (P61326), RBM8A (Q9Y5S9), REN3B (Q9BZI7), RNPS1 (Q15287), SRRM1 (Q8IYB3), THOC4 (Q86V81), UAP56 (Q13838)	8	FAL1 (Q12099), IF4A (P10081), dhh1 (P39517), sub2 (Q07478)	4	2	0.25 []	0.25 []	1.0 [('ATP binding', '4.57e-03'), ('RNA binding', '1.42e-04')]
825	JBP1-pICln complex	ANM5 (O14744), ICLN (P54105), RSMB (P14678)	3	RSMB (P40018), hsl7 (P38274)	2	1	0.5 [('positive regulation of mitosis', '5.68e-03')]	0.5 []	0.5 [('histone-arginine N-methyltransferase activity', '5.68e-03')]
832	Anti-Sm protein complex	ANM5 (O14744), DDX20 (Q9UHI6), GEMI2 (O14893), GEMI4 (P57678), ICLN (P54105), RSMB (P14678), SMN (Q16637)	7	RSMB (P40018), hsl7 (P38274)	2	1	0.5 [('positive regulation of mitosis', '5.68e-03')]	0.5 []	0.5 [('histone-arginine N-methyltransferase activity', '5.68e-03')]
441	TFTC-type histone acetyl transferase complex	ESR1 (P03372), GCNL2 (Q92830), MED1 (Q15648), MED12 (Q93074), MED13 (Q9UHV7), MED14 (O60244), MED16 (Q9Y2X0), MED17 (Q9NVC6), MED23 (Q9ULK4), MED24 (O75448), TRRAP (Q9Y4A5)	11	GCN5 (Q03330), TRA1 (P38811), ixr1 (P33417), mss11 (Q03825), nab2 (P32505), ykf4 (P35732)	6	4	0.67 [('transcription', '7.03e-04')]	0.5 []	0.33 []
1182	CDC5L core complex	CDC5L (Q99459), GCN1L (Q92616), HSP7C (P11142), PLRG1 (O43660), PRP19 (Q9UMS4), SPF27 (O75934)	6	CEF1 (Q03654), PRP19 (P32523), PRP46 (Q12417), gcn1 (P33892), grp78 (P16474), hsp71 (P10591), hsp72 (P10592), hsp73 (P09435), hsp74 (P22202), hsp75 (P11484), hsp76 (P40150), hsp77 (P12398), hsp7e (P39987)	13	10	0.38 [('SRP-dependent cotranslational protein targeting to membrane, translocation', '2.37e-11'), ('response to stress', '5.28e-06')]	0.38 []	0.69 [('ATP binding', '8.69e-06'), ('unfolded protein binding', '3.82e-14')]
806	BRM-SIN3A-HDAC complex	ACL6A (O96019), ANM5 (O14744), ARI1A (O14497), HDAC2 (Q92769), SIN3A (Q96ST3), SMCA2 (P51531), SMCE1 (Q969G3), SMRC1 (Q92922), SMRC2 (Q8TAQ2), SMRD1 (Q96GM5), SMRD2 (Q92925), SNF5 (Q12824)	12	MOT1 (P32333), RSC8 (P43609), SFH1 (Q06168), SNF2 (P22082), STH1 (P32597), SWI3 (P32591), arp4 (P80428), hos1 (Q12214), hos2 (P53096), rpd3 (P32561), sin3 (P22579), yab9 (P31380), ybv8 (P38266)	13	7	0.54 [('TRANSCRIPTION', '2.21e-05')]	0.23 [('RSC complex', '3.11e-05'), ('Rpd3L-Expanded complex', '4.42e-05')]	0.69 []
1256	MLL-HCF complex	ASH2L (Q9UBL3), HCFC1 (P51610), HEP2 (P05546), HRX (Q03164), MEN1 (O00255), RBBP5 (Q15291), WDR5 (P61964)	7	PFS2 (P42841), PWP2 (P25635), UTP13 (Q05946), copa (P53622), kel2 (P50090), prp46 (Q12417), set1 (P38827), swd1 (P39706), swd3 (P38123), tup1 (P16649), ycw2 (P25382)	11	8	0.27 [('chromatin silencing at telomere', '8.79e-04'), ('histone H3-K4 methylation', '2.81e-06'), ('telomere maintenance', '7.55e-05')]	0.27 [('Set1C/COMPASS complex', '1.88e-06')]	0.91 [('protein binding', '1.12e-02')]
778	LARC complex (LCR-associated remodeling complex)	ACL6A (O96019), ACTB (P60709), ARI1A (O14497), CHD4 (Q14839), HDAC1 (Q13547), HDAC2 (Q92769), HNRPC (P07910), MBD2 (Q9UBB5), MBD3 (O95983), MTA2 (O94776), P66B (Q8WXI9), RBBP4 (Q09028), REQU (Q92785), SMCA4 (P51532), SMCE1 (Q969G3), SMRC1 (Q92922), SMRC2 (Q8TAQ2), SMRD2 (Q92925), SNF5 (Q12824)	19	ARP7 (Q12406), RSC8 (P43609), SFH1 (Q06168), SNF2 (P22082), STH1 (P32597), SWI3 (P32591), act (P60010), arp1 (P38696), arp2 (P32381), arp4 (P80428), arp5 (P53946), hat2 (P39984), hos1 (Q12214), hos2 (P53096), msi1 (P13712), rpd3 (P32561), rrb1 (Q04225), ybv8 (P38266)	18	12	0.39 [('TRANSCRIPTION', '2.31e-04')]	0.28 []	0.78 [('protein binding', '1.49e-02')]
696	BRMS1-SIN3-HDAC complex	BRMS1 (Q9HCU9), HDAC1 (Q13547), HDAC2 (Q92769), RBBP4 (Q09028), RBBP7 (Q16576), SAP30 (O75446), SIN3A (Q96ST3), SIN3B (O75182)	8	HOS2 (P53096), RPD3 (P32561), SIN3 (P22579), hat2 (P39984), hos1 (Q12214), msi1 (P13712), rrb1 (Q04225)	7	4	0.57 [('TRANSCRIPTION', '2.07e-03')]	0.43 [('Rpd3L-Expanded complex', '5.49e-06')]	0.43 []
5685	Membrane protein complex (VCP, UFD1L, SEC61B)	SC61B (P60468), TERA (P55072), UFD1 (Q92890)	3	CDC48 (P25694), UFD1 (P53044), afg2 (P32794), pex1 (P24004), pex6 (P33760), rix7 (Q07844), tbp7 (P40340)	7	5	0.29 [('protein import into peroxisome matrix, receptor recycling', '1.50e-04')]	0.29 [('Cdc48p-Npl4p-Ufd1p AAA ATPase complex', '4.52e-05'), ('membrane fraction', '2.32e-02'), ('peroxisome', '6.02e-03'), ('soluble fraction', '1.39e-02')]	0.86 [('ATP binding', '1.54e-04')]
5876	PPP2R1A-PPP2R1B-PPP2CA-PPME1-EIF4A1 complex	2AAA (P30153), 2AAB (P30154), IF4A1 (P60842), PP2AA (P67775), PPME1 (Q9Y570)	5	2AAA (P31383), PP2A1 (P23594), PP2A2 (P23595), PPME1 (P38796), dhh1 (P39517), fal1 (Q12099), if4a (P10081), pp11 (P20604), pp2a4 (P32838), pp4c (P32345)	10	6	0.4 [('PROTEIN AMINO ACID DEPHOSPHORYLATION', '5.99e-07')]	0.4 []	0.6 []
230	Mediator complex	CCNC (P24863), CD2L6 (Q9BWU1), CDK8 (P49336), MD13L (Q71F56), MED1 (Q15648), MED10 (Q9BTT4), MED11 (Q9P086), MED12 (Q93074), MED13 (Q9UHV7), MED14 (O60244), MED15 (Q96RN5), MED16 (Q9Y2X0), MED17 (Q9NVC6), MED18 (Q9BUE0), MED19 (A0JLT2), MED20 (Q9H944), MED21 (Q13503), MED22 (Q15528), MED23 (Q9ULK4), MED24 (O75448), MED25 (Q71SY5), MED26 (O95402), MED27 (Q6P2C8), MED28 (Q9H204), MED29 (Q9NX70), ME…	32	MED31 (P38633), MED6 (P38782), MED7 (Q08278), SSN3 (P39073), SSN8 (P47821), ccl1 (P37366), ixr1 (P33417), mss11 (Q03825), nab2 (P32505), ykf4 (P35732)	10	5	0.4 [('TRANSCRIPTION', '7.98e-03')]	0.5 []	0.5 []
301	SMCC complex	CCNC (P24863), CDK8 (P49336), MED1 (Q15648), MED10 (Q9BTT4), MED12 (Q93074), MED13 (Q9UHV7), MED14 (O60244), MED16 (Q9Y2X0), MED17 (Q9NVC6), MED20 (Q9H944), MED21 (Q13503), MED24 (O75448), MED27 (Q6P2C8), MED31 (Q9Y3C7), MED6 (O75586), MED7 (O43513), TR150 (Q9Y2W1)	17	MED31 (P38633), MED6 (P38782), MED7 (Q08278), SSN3 (P39073), SSN8 (P47821), ccl1 (P37366), ixr1 (P33417), mss11 (Q03825), nab2 (P32505), ykf4 (P35732)	10	5	0.4 [('transcription', '7.98e-03')]	0.5 []	0.5 []
5233	TNF-alpha/NF-kappa B signaling complex 5	CRCM (P23508), CUL1 (Q13616), FBW1B (Q9UKB1), IF2M (P46199), IKBB (Q15653), IKKA (O15111), IKKB (O14920), IMA2 (P52292), IQGA2 (Q13576), LPPRC (P42704), NEMO (Q9Y6K9), NFKB1 (P19838), NFKB2 (Q00653), NGAP (Q9UJF2), PDCD2 (Q16342), REL (Q04864), RPA1 (O95602), RPA2 (Q9H9Y6), RPA34 (O15446), RPA49 (Q9GZS1), RPAB3 (P52434), RPAB5 (P62875), RPAC2 (Q9Y2S0), SKP1 (P63208), TF65 (Q04206)	25	RPA1 (P10964), RPA2 (P22138), RPA49 (Q01080), RPAB3 (P20436), RPAB5 (P22139), RPAC2 (P28000), RPB1 (P04050), RPC1 (P04051), RPC2 (P22276), bud2 (P33314), cdc53 (Q12018), if2m (P25038), if2p (P39730), iqg1 (Q12280), skp1 (P52286)	15	6	0.4 [('TRANSCRIPTION', '8.60e-04')]	0.4 [('DNA-directed RNA polymerase I complex', '1.98e-12')]	0.6 [('DNA-directed RNA polymerase activity', '8.80e-16')]
4158	HSP90-FKBP38-CAM-Ca(2+) complex	CALM (P62158), FKBP8 (Q14318), HS90A (P07900), HS90B (P08238)	4	CALM (P06787), HSC82 (P15108), MLC1 (P53141), cdc31 (P06704), hsp82 (P02829)	5	2	0.4 [('proteasome assembly', '2.60e-04')]	0.4 [('cellular bud neck', '1.87e-02'), ('cellular bud tip', '6.38e-03')]	0.6 [('calcium ion binding', '1.85e-05')]
2255	Cofilin-actin-CAP1 complex	ACTB (P60709), CAP1 (Q01518), COF1 (P23528)	3	ACT (P60010), ARP4 (P80428), ARP5 (P53946), arp1 (P38696), arp2 (P32381), arp7 (Q12406), cap (P17555), cofi (Q03048)	8	5	0.25 [('ascospore wall assembly', '1.36e-02'), ('chromatin remodeling', '8.20e-03'), ('establishment of mitotic spindle orientation', '1.21e-03'), ('histone acetylation', '1.68e-02'), ('mitochondrion inheritance', '1.01e-02')]	0.5 [('actin cortical patch', '5.79e-06')]	0.63 []
1111	DNA synthesome complex (17 subunits)	DPOA2 (Q14181), DPOD1 (P28340), DPOD2 (P49005), DPOD3 (Q15054), DPOD4 (Q9HCU8), DPOE1 (Q07864), DPOE2 (P56282), DPOE3 (Q9NRF9), DPOE4 (Q9NR33), DPOLA (P09884), PCNA (P12004), PRI1 (P49642), PRI2 (P49643), RFA1 (P27694), RFC1 (P35251), TOP1 (P11387), TOP2A (P11388), TOP2B (Q02880)	18	CTF18 (P49956), DPB2 (P24482), DPOA (P13382), DPOA2 (P38121), DPOE (P21951), PRI1 (P10363), PRI2 (P20457), RFC1 (P38630), dpod (P15436), dpod2 (P46957), dpoz (P14284), pcna (P15873), q8tg44 (Q8TG44), rfa1 (P22336), top1 (P04786), top2 (P06786)	16	8	0.44 [('lagging strand elongation', '3.45e-15')]	0.25 [('alpha DNA polymerase', '2.25e-10')]	0.69 []
3066	RNA polymerase II complex, chromatin structure modifying	CBP (Q92793), CCNC (P24863), CDK8 (P49336), ERCC3 (P19447), MED21 (Q13503), PCAF (Q92831), RPB1 (P24928), SMCA2 (P51531), SMCA4 (P51532), SNF5 (Q12824), T2FA (P35269), TF2B (Q00403), TF2H3 (Q13889)	13	GCN5 (Q03330), RPB1 (P04050), SSN3 (P39073), SSN8 (P47821), ccl1 (P37366), mot1 (P32333), rad25 (Q00578), rpa1 (P10964), rpc1 (P04051), sfh1 (Q06168), snf2 (P22082), sth1 (P32597), tf2b (P29055), tfb4 (Q12004)	14	10	0.43 [('TRANSCRIPTION', '5.45e-04')]	0.21 [('transcription factor complex', '2.07e-06')]	0.71 []
822	mRNA decay complex (UPF1, UPF2, UPF3B, DCP2, XRN1, XRN2, EXOSC2, EXOSC4, EXOSC10, PARN)	DCP2 (Q8IU60), EXOS2 (Q13868), EXOS4 (Q9NPD3), EXOSX (Q01780), PARN (O95453), REN3B (Q9BZI7), RENT1 (Q92900), RENT2 (Q9HAU5), XRN1 (Q8IZH2), XRN2 (Q9H0D6)	10	ECM32 (P32644), NAM7 (P30771), NMD2 (P38798), dcp2 (P53550), dna2 (P38859), hcs1 (P34243), rrp4 (P38792), rrp41 (P46948), rrp6 (Q12149), sen1 (Q00416), xrn1 (P22147), xrn2 (Q02792)	12	9	0.33 [("nuclear-transcribed mRNA catabolic process, 3'-5' exonucleolytic nonsense-mediated decay", '1.08e-07')]	0.42 []	0.58 []
4999	p97/VCP-VIMP-DERL1-DERL2-HRD1-SEL1L complex	DERL1 (Q9BUN8), DERL2 (Q9GZP9), SE1L1 (Q9UBV2), SELS (Q9BQE4), SYVN1 (Q86TM6), TERA (P55072)	6	PEX1 (P24004), PEX6 (P33760), afg2 (P32794), cdc48 (P25694), dfm1 (Q12743), hrd1 (Q08109), hrd3 (Q05787), rix7 (Q07844), tbp7 (P40340)	9	7	0.33 [('ER-ASSOCIATED PROTEIN CATABOLIC PROCESS', '1.06e-04')]	0.33 []	0.67 [('ATP binding', '4.52e-04')]
5604	Emerin complex 1	ACTB (P60709), CNN3 (Q15417), EMD (P50402), LMO7 (Q8WWI1), MYH9 (P35579), MYO1E (Q12965), SIKE (Q9BRV8), SPTA2 (Q13813)	8	ACT (P60010), ARP4 (P80428), ARP5 (P53946), arp1 (P38696), arp2 (P32381), arp7 (Q12406), myo1 (P08964), myo3 (P36006), myo5 (Q04439)	9	6	0.33 [('exocytosis', '6.64e-05')]	0.44 [('actin cortical patch', '3.76e-06')]	0.56 [('ATP binding', '7.13e-03')]
232	ARC complex	ACAD8 (Q9UKU7), MED1 (Q15648), MED12 (Q93074), MED13 (Q9UHV7), MED14 (O60244), MED15 (Q96RN5), MED17 (Q9NVC6), MED23 (Q9ULK4), MED24 (O75448), MED25 (Q71SY5), MED26 (O95402), MED4 (Q9NPJ6), MED6 (O75586), MED7 (O43513), MED8 (Q96G25)	15	MED6 (P38782), MED7 (Q08278), ixr1 (P33417), mss11 (Q03825), nab2 (P32505), ykf4 (P35732)	6	4	0.33 [('regulation of transcription from RNA polymerase II promoter', '1.86e-02'), ('transcription from RNA polymerase II promoter', '8.31e-03')]	0.67 []	0.33 [('RNA POLYMERASE II TRANSCRIPTION MEDIATOR ACTIVITY', '1.89e-03')]
2300	Profilin 2 complex	ACTB (P60709), CYFP1 (Q7L576), DYN1 (Q05193), HSP7C (P11142), NCKP1 (Q9Y2A7), PROF2 (P35080), ROCK2 (O75116), SYN1 (P17600), SYN2 (Q92777)	9	ACT (P60010), ARP4 (P80428), ARP5 (P53946), arp1 (P38696), arp2 (P32381), arp7 (Q12406), grp78 (P16474), hsp71 (P10591), hsp72 (P10592), hsp73 (P09435), hsp74 (P22202), hsp75 (P11484), hsp76 (P40150), hsp77 (P12398), hsp7e (P39987), mgm1 (P32266)	16	13	0.31 [('SRP-dependent cotranslational protein targeting to membrane, translocation', '6.42e-11'), ('response to stress', '1.38e-05')]	0.31 []	0.69 [('ATP BINDING', '4.98e-07')]
714	BRM-SIN3A complex	ACL6A (O96019), ANM5 (O14744), ARI1A (O14497), HDAC1 (Q13547), HDAC2 (Q92769), RBBP4 (Q09028), SIN3A (Q96ST3), SMCA2 (P51531), SMCE1 (Q969G3), SMRC1 (Q92922), SMRC2 (Q8TAQ2), SMRD1 (Q96GM5), SMRD2 (Q92925), SMRD3 (Q6STE5), SNF5 (Q12824)	15	MOT1 (P32333), RSC6 (P25632), RSC8 (P43609), SFH1 (Q06168), SNF2 (P22082), STH1 (P32597), SWI3 (P32591), arp4 (P80428), hat2 (P39984), hos1 (Q12214), hos2 (P53096), msi1 (P13712), rpd3 (P32561), rrb1 (Q04225), sin3 (P22579), yab9 (P31380), ybv8 (P38266)	17	10	0.41 [('TRANSCRIPTION', '1.49e-04')]	0.24 [('RSC complex', '5.13e-07')]	0.65 []
810	FCP1-associated protein complex	ANM5 (O14744), CTDP1 (Q9Y5B0), ERH (P84090), MEP50 (Q9BQA1), RPB2 (P30876), STK38 (Q15208), T2FA (P35269)	7	RPB2 (P08518), RPC2 (P22276), cbk1 (P53894), dbf2 (P22204), dbf20 (P32328), fcp1 (Q03254), hsl7 (P38274)	7	5	0.43 [('protein amino acid phosphorylation', '2.31e-03')]	0.43 [('cellular bud neck', '2.09e-03')]	0.43 [('protein serine/threonine kinase activity', '9.91e-04')]
2236	ASF1-histone containing complex	ASF1A (Q9Y294), ASF1B (Q9NVP2), CAF1B (Q13112), CHK2 (O96017), F10A1 (P50502), H31 (P68431), NASP (P49321)	7	ASF1 (P32447), RAD53 (P22216), cac2 (Q04199), cenpa (P36012), dun1 (P39009), h3 (P61830), hir1 (P32479)	7	5	0.43 [('DNA repair', '8.08e-04'), ('nucleosome assembly', '1.31e-05')]	0.29 [('chromosome, centromeric region', '1.89e-04'), ('nuclear nucleosome', '2.52e-04')]	0.57 []
1399	WDR5-ASH2L-RBBP5-MLL2 complex	ASH2L (Q9UBL3), MLL2 (O14686), RBBP5 (Q15291), WDR5 (P61964)	4	PFS2 (P42841), PWP2 (P25635), UTP13 (Q05946), copa (P53622), prp46 (Q12417), snf5 (P18480), swd1 (P39706), swd3 (P38123), tup1 (P16649), ycw2 (P25382), ykf4 (P35732)	11	8	0.27 [('telomere maintenance', '1.06e-04')]	0.18 [('Pwp2p-containing subcomplex of 90S preribosome', '4.13e-04'), ('Set1C/COMPASS complex', '7.69e-04'), ('chromosome, telomeric region', '6.83e-03')]	0.82 []
1223	H2AX complex, isolated from cells without IR exposure	CALM (P62158), CALR (P27797), EIF3L (Q9Y262), GRP78 (P11021), H2AX (P16104), H2B3B (Q8N257), H4 (P62805), HNRPR (O43390), LA (P05455), NPM (P06748), PABP1 (P11940), SP16H (Q9Y5B9), SSRP1 (Q08945)	13	H2A1 (P04911), H2A2 (P04912), H2B1 (P02293), H2B2 (P02294), H4 (P02309), POB3 (Q04636), SPT16 (P32558), cdc31 (P06704), grp78 (P16474), hsh49 (Q99181), hsp77 (P12398), lah1 (P33399), mip6 (P38760), pabp (P04147), rt106 (P40161)	15	8	0.53 [('NUCLEOSOME ASSEMBLY', '8.80e-16')]	0.33 [('nuclear nucleosome', '1.97e-11')]	0.4 [('DNA binding', '5.04e-05')]
924	Toposome	DDX21 (Q9NR30), DHX9 (Q08211), HNRPC (P07910), PRP8 (Q6P2Q9), SRPK1 (Q96SB4), SSRP1 (Q08945), TOP2A (P11388)	7	DHR1 (Q04217), pob3 (Q04636), prp8 (P33334), q8tg44 (Q8TG44), rt106 (P40161), sky1 (Q03656), top2 (P06786), yl419 (Q06698)	8	7	0.25 [('DNA topological change', '1.50e-04'), ('nucleosome assembly', '2.29e-03')]	0.38 []	0.63 [('ATP binding', '4.38e-03')]
100	hNURF complex	BPTF (Q12830), RBBP4 (Q09028), RBBP7 (Q16576), SMCA1 (P28370)	4	GCN5 (Q03330), hat2 (P39984), msi1 (P13712), rrb1 (Q04225)	4	3	0.5 [('DNA repair', '1.36e-02'), ('histone acetylation', '3.00e-03')]	0.5 []	0.25 [('H3 histone acetyltransferase activity', '1.36e-02')]
282	SNF2h-cohesin-NuRD complex	BAZ1A (Q9NRL2), CHD3 (Q12873), HDAC1 (Q13547), HDAC2 (Q92769), MBD2 (Q9UBB5), MBD3 (O95983), MTA1 (Q13330), MTA2 (O94776), RAD21 (O60216), RBBP4 (Q09028), RBBP7 (Q16576), SMC1A (Q14683), SMC3 (Q9UQE7), SMCA5 (O60264), STAG1 (Q8WVM7), STAG2 (Q8N3U4)	16	ISW1 (P38144), ISW2 (Q08773), ITC1 (P53125), hat2 (P39984), hos1 (Q12214), hos2 (P53096), msi1 (P13712), rad26 (P40352), rpd3 (P32561), rrb1 (Q04225), scc3 (P40541), smc1 (P32908), smc3 (P47037), smc4 (Q12267), spt7 (P35177), yab9 (P31380), yfk8 (P43610)	17	14	0.35 [('TRANSCRIPTION', '1.43e-03')]	0.29 []	0.59 []
1149	Histone H3.1 complex	ASF1A (Q9Y294), ASF1B (Q9NVP2), CAF1A (Q13111), CAF1B (Q13112), H31 (P68431), H4 (P62805), HAT1 (O14929), IPO4 (Q8TEX9), NASP (P49321), RBBP4 (Q09028)	10	H4 (P02309), HAT1 (Q12341), HAT2 (P39984), IMB3 (P32337), IMB4 (P40069), asf1 (P32447), cac1 (Q12495), cac2 (Q04199), cenpa (P36012), h3 (P61830), hir1 (P32479), msi1 (P13712), rrb1 (Q04225)	13	8	0.46 [('nucleosome assembly', '1.26e-11')]	0.38 []	0.38 []
1749	SMN-PolII-RHA complex	DDX20 (Q9UHI6), DHX9 (Q08211), GEMI2 (O14893), GEMI4 (P57678), RPB1 (P24928), RSMB (P14678), RSMN (P63162), RU2B (P08579), TBP (P20226), TF2B (Q00403)	10	RPA1 (P10964), RPB1 (P04050), RPC1 (P04051), dhr1 (Q04217), msl1 (P40567), rsmb (P40018), tbp (P13393), tf2b (P29055), yl419 (Q06698)	9	6	0.22 [('TRANSCRIPTION INITIATION FROM RNA POLYMERASE II PROMOTER', '1.35e-02')]	0.33 []	0.67 []
3082	DGCR8 multiprotein complex	DDX17 (Q92841), DDX5 (P17844), DGCR8 (Q8WYQ5), DHX9 (Q08211), FUS (P35637), GRP78 (P11021), HNRH1 (P31943), HNRPR (O43390), HNRPU (Q00839), ILF3 (Q12906), NUCL (P19338)	11	DHR1 (Q04217), ddr48 (P18899), rnq1 (P25367), yl419 (Q06698), ynu8 (P40159)	5	4	0.2 []	0.6 []	0.4 [('ATP-dependent helicase activity', '9.88e-04')]
1401	MOF complex	HRX (Q03164), MLL2 (O14686), MYST1 (Q9H7Z6), RBBP5 (Q15291), RING2 (Q99496), SET1A (O15047), TAF1 (P21675), TAF6 (P49848), TAF9 (Q16594), WDR5 (P61964)	10	ESA1 (Q08649), TAF1 (P46677), TAF6 (P53040), TAF9 (Q05027), copa (P53622), pfs2 (P42841), prp46 (Q12417), pwp2 (P25635), sas2 (P40963), set1 (P38827), snf5 (P18480), swd1 (P39706), swd3 (P38123), tup1 (P16649), utp13 (Q05946), ycw2 (P25382), ykf4 (P35732)	17	13	0.24 [('chromatin silencing at telomere', '1.71e-04'), ('histone acetylation', '4.39e-05'), ('telomere maintenance', '6.26e-06')]	0.18 [('Set1C/COMPASS complex', '1.08e-05'), ('transcription factor TFIID complex', '8.63e-05')]	0.76 []
2837	Profilin 1 complex	ACTG (P63261), CLH1 (Q00610), HSP7C (P11142), PROF1 (P07737), TBB2B (Q9BVA1), TERA (P55072)	6	ACT (P60010), ARP5 (P53946), CLH (P22137), HSP74 (P22202), afg2 (P32794), arp1 (P38696), arp2 (P32381), arp4 (P80428), arp7 (Q12406), cdc48 (P25694), grp78 (P16474), hsp71 (P10591), hsp72 (P10592), hsp73 (P09435), hsp75 (P11484), hsp76 (P40150), hsp77 (P12398), hsp7e (P39987), pex1 (P24004), pex6 (P33760), rix7 (Q07844), tbb (P02557), tbg (P53378), tbp7 (P40340)	24	20	0.21 [('SRP-dependent cotranslational protein targeting to membrane, translocation', '6.21e-10'), ('response to stress', '1.21e-04')]	0.25 []	0.71 [('ATP binding', '6.91e-11')]
2721	HCF-1 complex	ASH2L (Q9UBL3), GRP78 (P11021), HCFC1 (P51610), HDAC1 (Q13547), HDAC2 (Q92769), HS90A (P07900), HS90B (P08238), HSP74 (P34932), HSP7C (P11142), OGT1 (O15294), RBBP4 (Q09028), RBBP7 (Q16576), SAP30 (O75446), SDS3 (Q9H7L9), SET1A (O15047), SIN3A (Q96ST3), SIN3B (O75182), SP1 (P08047), WDR5 (P61964)	19	PFS2 (P42841), PWP2 (P25635), UTP13 (Q05946), cdc27 (P38042), copa (P53622), grp78 (P16474), hat2 (P39984), hos1 (Q12214), hos2 (P53096), hsc82 (P15108), hsp71 (P10591), hsp72 (P10592), hsp73 (P09435), hsp74 (P22202), hsp75 (P11484), hsp76 (P40150), hsp77 (P12398), hsp79 (P32590), hsp7e (P39987), hsp7f (P32589), hsp82 (P02829), kel2 (P50090), msi1 (P13712), prp46 (Q12417), rpd3 (P32561), rrb1 (Q0…	31	28	0.23 [('response to stress', '1.55e-06')]	0.39 []	0.42 [('ATP binding', '7.20e-05')]
1257	ALL-1 supercomplex	CHD3 (Q12873), CPSF2 (Q9P2I0), HDAC1 (Q13547), HDAC2 (Q92769), HRX (Q03164), LSD1 (O60341), MBD3 (O95983), MTA2 (O94776), RAN (P62826), RBBP4 (Q09028), RBBP5 (Q15291), RBBP7 (Q16576), SAP18 (O00422), SAP30 (O75446), SIN3A (Q96ST3), SMCA2 (P51531), SMCA5 (O60264), SMRC1 (Q92922), SMRC2 (Q8TAQ2), SNF5 (Q12824), SYMPK (Q92797), TAF1 (P21675), TAF12 (Q16514), TAF6 (P49848), TAF9 (Q16594), TBP (P20226…	28	ISW1 (P38144), ISW2 (Q08773), MOT1 (P32333), RSC8 (P43609), SFH1 (Q06168), SNF2 (P22082), STH1 (P32597), SWI3 (P32591), TBP (P13393), cft2 (Q12102), copa (P53622), ef2 (P32324), hat2 (P39984), hos1 (Q12214), hos2 (P53096), msi1 (P13712), pfs2 (P42841), prp46 (Q12417), pwp2 (P25635), rad26 (P40352), rpd3 (P32561), rrb1 (Q04225), set1 (P38827), sin3 (P22579), sn114 (P36048), swd1 (P39706), swd3 (P3…	36	27	0.22 [('TRANSCRIPTION', '5.23e-03')]	0.17 []	0.61 []

## Sheet: HC human predictions
Prediction of human complexes by aligning yeast complexes to the human interactome (high-confidence predictions). #QCC/#TCC: number of query/target complex components; only significant GO terms are shown; those GO terms that also belong to the set of most abundant significant GO terms of the given query complex are highlighted in capitals; complexes are sorted by homogeneity, followed by the frac…
Query complex ID	Query complex name	Query complex components	#QCC	Target complex components	#TCC	New	Biological process homogeneity	Cellular component homogeneity	Molecular function homogeneity
250	Isocitrate dehydrogenase	IDH1 (P28834), IDH2 (P28241)	2	IDH3G (P51553), idh3a (P50213), idh3b (O43837), idh3b (O43837-2)	4	3	1.0 [('OXIDATION REDUCTION', '1.76e-06'), ('TRICARBOXYLIC ACID CYCLE', '7.97e-11')]	1.0 [('mitochondrial matrix', '2.91e-08')]	1.0 [('ISOCITRATE DEHYDROGENASE (NAD+) ACTIVITY', '1.09e-14'), ('MAGNESIUM ION BINDING', '4.38e-06'), ('MANGANESE ION BINDING', '4.27e-08'), ('NAD OR NADH BINDING', '1.91e-10')]
410.40.140	Topoisomerases	TOP1 (P04786), TOP2 (P06786)	2	TOP2A (P11388), TOP2B (Q02880)	2	0	1.0 [('DNA TOPOLOGICAL CHANGE', '1.61e-06')]	1.0 [('chromosome', '8.50e-05'), ('nucleoplasm', '7.71e-03')]	1.0 [('DNA TOPOISOMERASE (ATP-HYDROLYZING) ACTIVITY', '4.83e-07'), ('chromatin binding', '3.35e-04'), ('histone deacetylase binding', '3.06e-05'), ('protein C-terminus binding', '1.00e-03'), ('protein heterodimerization activity', '1.31e-03'), ('protein kinase C binding', '1.69e-05')]
510.180.10.10	NEF1 complex	RAD1 (P06777), RAD10 (P06838), RAD14 (P28519)	3	ERCC1 (P07992), XPA (P23025), XPF (Q92889)	3	0	1.0 [('nucleotide-excision repair, DNA damage removal', '1.73e-08')]	1.0 [('nucleoplasm', '6.39e-05')]	1.0 [('DAMAGED DNA BINDING', '4.75e-08')]
510.5	TFIIA	TOA1 (P32773), TOA2 (P32774)	2	T2AG (P52657), TF2AA (P52655)	2	0	1.0 [('RNA elongation from RNA polymerase II promoter', '1.33e-04'), ('TRANSCRIPTION INITIATION FROM RNA POLYMERASE II PROMOTER', '2.60e-04'), ('general transcription from RNA polymerase II promoter', '3.86e-07')]	1.0 [('TRANSCRIPTION FACTOR TFIIA COMPLEX', '7.73e-07')]	1.0 [('GENERAL RNA POLYMERASE II TRANSCRIPTION FACTOR ACTIVITY', '2.70e-05'), ('TATA-binding protein binding', '7.73e-07'), ('protein heterodimerization activity', '1.05e-03'), ('transcription coactivator activity', '1.72e-03')]
320	Nucleosomal protein complex	H2A1 (P04911), H2A2 (P04912), H2B1 (P02293), H2B2 (P02294), H3 (P61830), H4 (P02309)	6	CENPA (P49450), H31 (P68431), H31T (Q16695), H32 (Q71DI3), H33 (P84243), H4 (P62805)	6	0	1.0 [('NUCLEOSOME ASSEMBLY', '3.66e-14')]	1.0 [('nucleosome', '5.07e-15')]	1.0 [('DNA BINDING', '1.02e-07')]
510.180.50.30	MLH1/PMS1 complex	MLH1 (P38920)	1	MLH1 (P40692), PMS2 (P54278)	2	0	1.0 [('mismatch repair', '1.22e-05')]	1.0 []	1.0 []
340	Phosphofructokinase	K6PF1 (P16861), K6PF2 (P16862)	2	K6PF (P08237), K6PL (P17858), K6PP (Q01813)	3	0	1.0 [('GLYCOLYSIS', '1.08e-07')]	1.0 [('6-PHOSPHOFRUCTOKINASE COMPLEX', '2.17e-11')]	1.0 [('6-PHOSPHOFRUCTOKINASE ACTIVITY', '2.17e-11'), ('ATP binding', '5.71e-03'), ('MAGNESIUM ION BINDING', '1.12e-04')]
520.2	Oligosaccharyltransferase	OST1 (P41543), OST2 (P46964), OST3 (P48439), OST4 (Q99380), OST5 (Q92316), OST6 (Q03723), OSTB (P33767), OSTD (Q02795), STT3 (P39007)	9	OST48 (P39656), RPN1 (P04843), STT3A (P46977), STT3B (Q8TCJ2)	4	0	1.0 [('protein amino acid N-linked glycosylation via asparagine', '7.84e-13')]	1.0 [('INTEGRAL TO MEMBRANE', '7.02e-04'), ('OLIGOSACCHARYLTRANSFERASE COMPLEX', '7.84e-13')]	1.0 [('DOLICHYL-DIPHOSPHOOLIGOSACCHARIDE-PROTEIN GLYCOTRANSFERASE ACTIVITY', '2.18e-13')]
330	Phenylalaninine-tRNA-ligase	SYFA (P15625), SYFB (P15624), SYFM (P08425)	3	SYFA (Q9Y285), SYFB (Q9NSD9)	2	0	1.0 [('PHENYLALANYL-TRNA AMINOACYLATION', '8.05e-08')]	1.0 [('soluble fraction', '8.88e-04')]	1.0 [('PHENYLALANINE-TRNA LIGASE ACTIVITY', '8.05e-08')]
380	Pyruvate kinase	KPYK1 (P00549), KPYK2 (P52489)	2	KPYM (P14618)	1	0	1.0 [('programmed cell death', '1.61e-03')]	1.0 []	1.0 [('PYRUVATE KINASE ACTIVITY', '1.61e-03')]
480.2	SPB associated proteins	AME1 (P38313), ARP1 (P38696), BIK1 (P11709), CIK1 (Q01649), DYHC (P36022), JNM1 (P36224), KAR3 (P17119), KAR5 (Q04746), NDC80 (P40460), NUF2 (P33895), SPC19 (Q03954), SPC34 (P36131), STU1 (P38198), STU2 (P46675)	14	NDC80 (O14777), NUF2 (Q9BZD4)	2	0	1.0 [('CELL DIVISION', '1.52e-03')]	1.0 [('Ndc80 complex', '4.83e-07'), ('condensed chromosome kinetochore', '4.79e-05')]	1.0 []
260.50.10	t-SNAREs	PEP12 (P32854), SEC20 (P28791), SED5 (Q01590), SSO1 (P32867), SSO2 (P39926), TLG1 (Q03322), TLG2 (Q08144), UFE1 (P41834)	8	STX1A (Q16623)	1	0	1.0 [('regulation of insulin secretion', '3.77e-03')]	1.0 []	1.0 [('SNAP RECEPTOR ACTIVITY', '9.69e-03')]
360.10.10	20S proteasome	PSA1 (P40302), PSA2 (P23639), PSA3 (P21242), PSA4 (P23638), PSA5 (P32379), PSA6 (P21243), PSA7 (P40303), PSB1 (P23724), PSB2 (P22141), PSB3 (P25451), PSB4 (P30657), PSB5 (P30656), PSB6 (P38624), PSB7 (P25043), UMP1 (P38293)	15	PSA1 (P25786), PSA1 (P25786-2), PSA2 (P25787), PSA3 (P25788), PSA3 (P25788-2), PSA4 (P25789), PSA5 (P28066), PSA6 (P60900), PSA7 (O14818), PSB1 (P20618), PSB10 (P40306), PSB2 (P49721), PSB3 (P49720), PSB4 (P28070), PSB5 (P28074), PSB6 (P28072), PSB7 (Q99436), PSB8 (P28062), PSB8 (P28062-2), PSB9 (P28065), PSB9 (P28065-2), Q5JNW7 (Q5JNW7), Q5QNR8 (Q5QNR8), Q86U62 (Q86U62)	24	0	0.88 [('anaphase-promoting complex-dependent proteasomal ubiquitin-dependent protein catabolic process', '1.32e-15'), ('negative regulation of ubiquitin-protein ligase activity during mitotic cell cycle', '1.32e-15'), ('positive regulation of ubiquitin-protein ligase activity during mitotic cell cycle', '1.32e-15')]	1.0 [('cytosol', '1.32e-15'), ('proteasome core complex', '1.32e-15')]	1.0 [('THREONINE-TYPE ENDOPEPTIDASE ACTIVITY', '1.32e-15')]
140.30.10	Tubulins	TBA1 (P09733), TBA3 (P09734), TBB (P02557), TBG (P53378)	4	TBA1B (P68363), TBA1C (Q9BQE3), TBA3C (Q13748), TBA4A (P68366), TBA8 (Q9NY65), TBB5 (P07437), tba1a (Q71U36)	7	1	1.0 [('PROTEIN POLYMERIZATION', '1.32e-15'), ('microtubule-based movement', '1.32e-15')]	0.86 [('PROTEIN COMPLEX', '2.45e-12'), ('microtubule', '4.61e-10')]	1.0 [('GTP BINDING', '3.43e-11'), ('GTPASE ACTIVITY', '1.02e-12')]
500.10.30	eIF2B	EI2BA (P14741), EI2BB (P32502), EI2BD (P12754), EI2BE (P32501), EI2BG (P09032)	5	EI2BA (Q14232), EI2BB (P49770), EI2BD (Q9UI10), EI2BE (Q13144), EI2BG (Q9NR50), q9bpx4 (Q9BPX4)	6	1	1.0 [('response to glucose stimulus', '1.10e-15'), ('response to heat', '1.10e-15'), ('response to peptide hormone stimulus', '1.10e-15')]	0.83 [('EUKARYOTIC TRANSLATION INITIATION FACTOR 2B COMPLEX', '1.10e-15')]	1.0 [('TRANSLATION INITIATION FACTOR ACTIVITY', '4.32e-14')]
133.1	Cdc28p complexes	CDC28 (P00546), CG11 (P20437), CG12 (P20438), CG13 (P13365), CG21 (P24868), CG22 (P24869), CG23 (P24870), CG24 (P24871), CGS5 (P30283), CGS6 (P32943)	10	CCNB1 (P14635), CCNB2 (O95067), CDC2 (P06493), ccna1 (P78396), cdk2 (P24941)	5	2	1.0 [('CELL DIVISION', '6.23e-09'), ('mitosis', '1.60e-09')]	1.0 [('cytosol', '6.14e-06')]	0.8 []
260.20.20	AP-2 complex	AP2A (P38065), AP2B (P27351), AP2M (Q99186), AP2S (Q00381)	4	AP1B1 (Q10567), AP1G1 (O43747), AP1M1 (Q9BXS5), AP2B1 (P63010), AP2M1 (Q96CW1), ap2a1 (O95782), ap2a1 (O95782-2), ap2a2 (O94973)	8	3	1.0 [('INTRACELLULAR PROTEIN TRANSPORT', '1.06e-15')]	1.0 [('cytosol', '1.47e-09')]	0.75 [('protein transporter activity', '6.38e-13')]
500.20.10	eEF1	EF1A (P02994), EF1B (P32471), EF1G1 (P29547), EF1G2 (P36008), HBS1 (P32769)	5	EF1A1 (P68104), EF1B (P24534), EF1D (P29692), EF1G (P26641), Q96I38 (Q96I38), Q9H7G6 (Q9H7G6), ef1a2 (Q05639)	7	1	0.86 [('TRANSLATIONAL ELONGATION', '5.59e-12')]	0.86 [('EUKARYOTIC TRANSLATION ELONGATION FACTOR 1 COMPLEX', '6.60e-16')]	1.0 [('TRANSLATION ELONGATION FACTOR ACTIVITY', '6.60e-16')]
410.35	Replication complex	CDC45 (Q08032), CDC47 (P38132), CDC54 (P30665), DPB11 (P47027), DPB2 (P24482), DPB3 (P27344), DPOD (P15436), DPOD2 (P46957), DPOD3 (P47110), DPOE (P21951), MCM2 (P29469), MCM3 (P24279), MCM5 (P29496), MCM6 (P53091), ORC1 (P54784), ORC2 (P32833), ORC3 (P54790), ORC4 (P54791), ORC5 (P50874), ORC6 (P38826)	20	MCM2 (P49736), MCM3 (P25205), MCM4 (P33991), MCM5 (P33992), MCM6 (Q14566), MCM7 (P33993), q9h4n9 (Q9H4N9)	7	1	1.0 [('DNA REPLICATION INITIATION', '6.60e-16')]	0.71 [('nucleoplasm', '9.70e-07')]	1.0 [('ATP binding', '4.05e-07')]
430	Ribonucleoside-diphosphate reductase	RIR1 (P21524), RIR2 (P09938), RIR3 (P21672), RIR4 (P49723)	4	RIR1 (P23921), rir2 (P31350), rir2b (Q7LG56)	3	2	1.0 [('OXIDATION REDUCTION', '3.39e-05')]	0.67 []	1.0 [('RIBONUCLEOSIDE-DIPHOSPHATE REDUCTASE ACTIVITY', '1.30e-11')]
510.180.50.10	MSH2/MSH3 complex	MSH2 (P25847), MSH3 (P25336), PMS1 (P14242)	3	MSH2 (P43246), MSH3 (P20585), msh4 (O15457)	3	1	1.0 [('mismatch repair', '1.48e-08')]	0.67 [('MUTSBETA COMPLEX', '1.45e-07')]	1.0 [('ATP BINDING', '3.43e-03')]
510.16	CCAAT-binding factor complex	HAP2 (P06774), HAP3 (P13434), HAP4 (P14064), HAP5 (Q02516)	4	NFYA (P23511), NFYB (P25208), NFYC (Q13952)	3	0	0.67 []	1.0 [('CCAAT-BINDING FACTOR COMPLEX', '5.20e-11')]	1.0 [('transcription factor activity', '5.12e-04')]
510.180.50.20	MSH2/MSH6 complex	MSH2 (P25847), MSH6 (Q03834)	2	MSH2 (P43246), MSH3 (P20585), MSH6 (P52701)	3	0	1.0 [('negative regulation of DNA recombination', '2.17e-11'), ('positive regulation of helicase activity', '4.33e-10')]	0.67 [('MUTSALPHA COMPLEX', '2.42e-07'), ('MutSbeta complex', '2.42e-07')]	1.0 [('ATP binding', '5.71e-03')]
440.12.10	Exosome complex	RRP4 (P38792), RRP41 (P46948), RRP42 (Q12277), RRP43 (P25359), RRP44 (Q08162), RRP45 (Q05636), RRP46 (P53256)	7	EXOS2 (Q13868), EXOS4 (Q9NPD3), EXOS5 (Q9NQT4), EXOS7 (Q15024), EXOS8 (Q96B26), EXOS9 (Q06265), RRP44 (Q9Y2L1), di3l2 (Q8IYB7)	8	1	0.88 [('rRNA processing', '1.49e-15')]	0.88 [('NUCLEOLUS', '4.98e-10')]	0.88 [('RNA BINDING', '1.91e-09')]
410.2	Replication initiation complex	CDC7 (P06243), DBF4 (P32325), ORC1 (P54784), ORC2 (P32833), ORC3 (P54790), ORC4 (P54791), ORC5 (P50874), ORC6 (P38826)	8	ORC1 (Q13415), ORC2 (Q13416), ORC4 (O43929), ORC5 (O43913), cdc6 (Q99741)	5	1	0.8 [('DNA REPLICATION INITIATION', '5.66e-11')]	1.0 [('nucleoplasm', '6.45e-08')]	0.8 [('ATP binding', '2.19e-03')]
110	cAMP-dependent protein kinase	KAPA (P06244), KAPB (P06245), KAPC (P05986), KAPR (P07278)	4	KAP1 (P31321), KAP2 (P13861), KAP3 (P31323), KAPCA (P17612), KAPCB (P22694)	5	0	1.0 [('hormone-mediated signaling', '9.07e-13')]	1.0 [('CAMP-DEPENDENT PROTEIN KINASE COMPLEX', '8.80e-16')]	0.6 [('cAMP binding', '3.81e-08'), ('cAMP-dependent protein kinase regulator activity', '4.95e-08')]
75	Arginase	ARGI (P00812)	1	argi1 (P05089), argi2 (P78540)	2	2	1.0 [('urea cycle', '1.69e-06')]	0.5 []	1.0 [('ARGINASE ACTIVITY', '8.05e-08'), ('manganese ion binding', '3.98e-04')]
260.30.90	other coat complexes	SEC7 (P11075)	1	big1 (Q9Y6D6), big2 (Q9Y6D5)	2	2	1.0 [('REGULATION OF ARF PROTEIN SIGNAL TRANSDUCTION', '2.03e-06'), ('exocytosis', '6.43e-05')]	0.5 []	1.0 [('ARF GUANYL-NUCLEOTIDE EXCHANGE FACTOR ACTIVITY', '2.03e-06')]
350.3	Processing peptidase	MPPA (P11914), MPPB (P10507)	2	MPPB (O75439), mppa (Q10713), qcr1 (P31930), qcr2 (P22695)	4	3	1.0 [('PROTEOLYSIS', '1.08e-06')]	0.5 [('mitochondrial inner membrane', '9.37e-04'), ('mitochondrial matrix', '1.96e-03')]	1.0 [('METALLOENDOPEPTIDASE ACTIVITY', '4.34e-09'), ('zinc ion binding', '9.59e-04')]
420.2	Succinate dehydrogenase complex (complex II)	DHSA (Q00711), DHSB (P21801), DHSD (P37298), SDH3 (P33421)	4	DHSA (P31040), dhsb (P21912)	2	1	1.0 [('TRANSPORT', '1.62e-03'), ('TRICARBOXYLIC ACID CYCLE', '2.60e-05')]	0.5 [('MITOCHONDRIAL RESPIRATORY CHAIN COMPLEX II', '1.26e-03')]	1.0 [('SUCCINATE DEHYDROGENASE (UBIQUINONE) ACTIVITY', '1.13e-07'), ('electron carrier activity', '7.13e-04')]
80	Arginine-specific carbamoylphosphate synthase	CARA (P07258), CARB (P03965)	2	CPSM (P31327), pyr1 (P27708)	2	1	1.0 [('glutamine metabolic process', '4.43e-06')]	0.5 [('mitochondrial nucleoid', '2.33e-02')]	1.0 []
410.40.30	Replication factor C complex	RFC1 (P38630), RFC2 (P40348), RFC3 (P38629), RFC4 (P40339), RFC5 (P38251)	5	CTF18 (Q8WVB6), RFC1 (P35251), RFC2 (P35250), RFC3 (P40938), RFC4 (P35249), RFC5 (P40937)	6	0	0.83 [('nucleotide-excision repair, DNA gap filling', '1.30e-13')]	0.83 [('DNA REPLICATION FACTOR C COMPLEX', '1.10e-15'), ('nucleoplasm', '4.73e-07')]	0.83 [('ATP BINDING', '3.41e-04'), ('DNA clamp loader activity', '1.10e-15')]
260.30.30.10	Vps35/Vps29/Vps26 complex	PEP11 (P38759), VPS26 (P40335), VPS35 (P34110)	3	VPS29 (Q9UBQ0), VPS35 (Q96QK1)	2	0	1.0 [('PROTEIN TRANSPORT', '2.48e-03')]	1.0 [('ENDOSOME', '6.01e-04'), ('membrane', '5.77e-03')]	0.5 [('phosphoserine phosphatase activity', '2.15e-03')]
310.3	NSP1-NIC96 complex	NSP1 (P14907)	1	NU153 (P49790), NUP62 (P37198)	2	0	1.0 [('intracellular protein transmembrane transport', '4.28e-04'), ('mRNA transport', '2.72e-04')]	1.0 [('nuclear pore', '3.99e-04')]	0.5 [('STRUCTURAL CONSTITUENT OF NUCLEAR PORE', '1.61e-02')]
260.30.10	COPI	ARF1 (P11076), COPA (P53622), COPB (P41810), COPB2 (P41811), COPD (P43621), COPE (P40509), COPG (P32074), COPZ (P53600)	8	COPA (P53621), COPB (P53618), COPB2 (P35606), COPD (P48444), COPG (Q9Y678), COPG2 (Q9UBF2), COPZ1 (P61923), COPZ2 (Q9P299), ap1b1 (Q10567), ap2b1 (P63010), lis1 (P43034), wdr5 (P61964)	12	4	0.83 [('intracellular protein transport', '6.60e-16')]	0.75 [('cytosol', '1.83e-08')]	0.83 [('protein binding', '9.27e-04')]
140.10.20	Septin filaments	CDC10 (P25342), CDC11 (P32458), CDC12 (P32468), CDC3 (P32457), SHS1 (Q07657), SPR28 (Q04921), SPR3 (P41901)	7	SEPT9 (Q9UHD8-2), SEPT9 (Q9UHD8-3), q99648 (Q99648), sept4 (O43236), sept7 (Q16181)	5	3	0.8 [('CELL CYCLE', '1.81e-06')]	0.6 [('plasma membrane', '1.64e-02'), ('stress fiber', '1.21e-07')]	1.0 [('GTP BINDING', '4.74e-08'), ('protein binding', '1.52e-02')]
510.180.20	other DNA repair complexes	RAD51 (P25454), RAD52 (P06778), RAD54 (P32863), RAD55 (P38953), RAD57 (P25301)	5	RAD51 (Q06609), dmc1 (Q14565), rad52 (P43351)	3	2	1.0 [('reciprocal meiotic recombination', '1.47e-08')]	0.67 [('condensed nuclear chromosome', '1.88e-05')]	0.67 []
260.20.30	AP-3 complex	AP3B (P46682), AP3D (Q08951), AP3M (P38153), AP3S (P47064)	4	AP3B1 (O00203), AP3B2 (Q13367), AP3D1 (O14617), AP3M1 (Q9Y2T2), AP3S1 (Q92572), AP3S2 (P59780), ap1g1 (O43747), ap4e1 (Q9UPM8), ap4s1 (Q9Y587)	9	3	0.78 [('INTRACELLULAR PROTEIN TRANSPORT', '3.28e-12')]	0.67 [('GOLGI APPARATUS', '2.21e-07')]	0.89 [('protein binding', '1.81e-03')]
500.10.50	eIF4A	IF4A (P10081)	1	IF4A1 (P60842), IF4A2 (Q14240), if4a3 (P38919)	3	1	0.67 [('translation', '7.22e-04')]	0.67 [('EUKARYOTIC TRANSLATION INITIATION FACTOR 4F COMPLEX', '8.69e-06')]	1.0 [('ATP binding', '5.71e-03')]
510.190.40	NOT complex	NOT1 (P25655), NOT2 (P06100), NOT3 (P06102), NOT4 (P34909), NOT5 (Q12514)	5	CNOT1 (A5YKK6), CNOT3 (O75175), cnot4 (O95628)	3	1	1.0 [('regulation of transcription', '2.95e-04'), ('transcription', '5.10e-03')]	0.67 []	0.67 []
510.14	TFIIIB	TBP (P13393), TF3B (P29056), TFC5 (P46678)	3	TBP (P20226), TF3B (Q92994), tbpl1 (P62380)	3	1	1.0 [('REGULATION OF TRANSCRIPTION, DNA-DEPENDENT', '1.71e-04')]	0.67 [('transcription factor TFIID complex', '1.74e-05')]	0.67 []
120.2	Casein kinase II	CSK21 (P15790), CSK22 (P19454), CSK2B (P43639), CSK2C (P38930)	4	CSK21 (P68400), CSK22 (P19784), CSK2B (P67870)	3	0	1.0 [('Wnt receptor signaling pathway', '2.06e-06')]	0.33 [('NuRD complex', '1.61e-02'), ('PROTEIN KINASE CK2 COMPLEX', '1.62e-03'), ('Sin3 complex', '1.29e-02')]	1.0 [('protein serine/threonine kinase activity', '5.92e-05')]
140.20.30	Actin-associated motorproteins	MYO1 (P08964), MYO2 (P19524), MYO3 (P36006), MYO4 (P32492), MYO5 (Q04439), SMY1 (P32364), SMY2 (P32909)	7	MYO5A (Q9Y4I1), MYO5B (Q9ULV0), MYO5C (Q9NQX4)	3	0	0.33 [('actin filament-based movement', '1.08e-02')]	1.0 [('MYOSIN COMPLEX', '4.98e-08')]	1.0 [('ATP BINDING', '5.71e-03'), ('calmodulin binding', '7.75e-06')]
475.05	Sister chromatid cohesion complex	REC8 (Q12188), SCC1 (Q12158), SCC2 (Q04002), SCC3 (P40541), SMC1 (P32908), SMC3 (P47037)	6	SMC1A (Q14683), SMC3 (Q9UQE7), STAG1 (Q8WVM7), STAG2 (Q8N3U4), smc1b (Q8NDV3), smc2 (O95347), smc4 (Q9NTJ3)	7	3	0.86 [('CELL DIVISION', '5.50e-10')]	0.71 [('cytoplasm', '5.76e-03')]	0.71 [('ATP binding', '6.53e-04')]
500.10.40	eIF3	EIF3A (P38249), EIF3B (P06103), EIF3C (P32497), EIF3G (Q04067), EIF3I (P40217), SUI1 (P32911), TRM6 (P41814)	7	EIF3A (Q14152), EIF3B (P55884), EIF3C (Q99613), EIF3G (O75821), EIF3I (Q13347), eif1 (P41567), eif1b (O60739), strap (Q9Y3F4)	8	3	0.75 [('TRANSLATIONAL INITIATION', '1.16e-13')]	0.63 [('EUKARYOTIC TRANSLATION INITIATION FACTOR 3 COMPLEX', '3.12e-13'), ('cytosol', '2.88e-04')]	0.88 [('TRANSLATION INITIATION FACTOR ACTIVITY', '1.16e-15')]
410.40.90	DNA polymerase delta (III)	DPOD (P15436), DPOD2 (P46957), DPOD3 (P47110)	3	DPOD1 (P28340), DPOD2 (P49005), DPOLA (P09884), dpolz (O60673)	4	1	0.5 [('DNA synthesis during DNA repair', '2.09e-05'), ('S phase of mitotic cell cycle', '3.48e-06'), ('nucleotide-excision repair, DNA gap filling', '7.87e-05')]	0.75 [('nucleoplasm', '5.01e-04')]	1.0 [('DNA binding', '6.34e-05'), ('DNA-DIRECTED DNA POLYMERASE ACTIVITY', '9.92e-11')]
510.40.10	RNA polymerase II	CDC73 (Q06697), RPAB1 (P20434), RPAB2 (P20435), RPAB3 (P20436), RPAB4 (P40422), RPAB5 (P22139), RPB1 (P04050), RPB11 (P38902), RPB2 (P08518), RPB3 (P16370), RPB4 (P20433), RPB7 (P34087), RPB9 (P27999)	13	RPAB1 (P19388), RPAB2 (P61218), RPAB3 (P52434), RPAB5 (P62875), RPB1 (P24928), RPB11 (P52435), RPB2 (P30876), RPB3 (P19387), RPB4 (O15514), RPB7 (P62487), RPB9 (P36954), q9bsr4 (Q9BSR4), rpa1 (O95602), rpac1 (O15160), rpc1 (O14802)	15	4	0.73 [('RNA elongation from RNA polymerase II promoter', '1.10e-15'), ('nuclear mRNA splicing, via spliceosome', '1.10e-15'), ('transcription initiation from RNA polymerase II promoter', '1.10e-15')]	0.47 [('nucleoplasm', '3.20e-07')]	1.0 [('DNA-DIRECTED RNA POLYMERASE ACTIVITY', '1.10e-15')]
240.2	HDB complex	RPD3 (P32561), SAP30 (P38429), SIN3 (P22579)	3	HDAC1 (Q13547), HDAC2 (Q92769), SIN3A (Q96ST3), SIN3B (O75182), hdac3 (O15379)	5	1	1.0 [('TRANSCRIPTION', '5.15e-05')]	0.6 [('Sin3 complex', '1.21e-08')]	0.6 [('HISTONE DEACETYLASE ACTIVITY', '1.47e-07'), ('transcription factor binding', '2.60e-05')]
510.70.20	TAFIIs	TAF1 (P46677), TAF10 (Q12030), TAF11 (Q04226), TAF12 (Q03761), TAF13 (P11747), TAF14 (P35189), TAF2 (P23255), TAF3 (Q12297), TAF5 (P38129), TAF6 (P53040), TAF7 (Q05021), TAF9 (Q05027)	12	TAF1 (P21675), TAF10 (Q12962), TAF11 (Q15544), TAF12 (Q16514), TAF12 (Q16514-2), TAF1L (Q8IZX4), TAF2 (Q6P1X5), TAF5 (Q15542), TAF6 (P49848), TAF7 (Q15545), TAF9 (Q16594), TAF9B (Q9HBM6), nfm (P07197), taf5l (O75529)	14	2	0.71 [('TRANSCRIPTION INITIATION FROM RNA POLYMERASE II PROMOTER', '6.60e-16')]	0.86 [('TRANSCRIPTION FACTOR TFIID COMPLEX', '6.60e-16')]	0.57 [('transcription coactivator activity', '1.55e-11')]
60	Anaphase promoting complex (APC)	APC1 (P53886), APC10 (P53068), APC11 (Q12157), APC2 (Q12440), APC4 (Q04601), APC5 (Q08683), APC9 (Q12107), CDC16 (P09798), CDC23 (P16522), CDC26 (P14724), CDC27 (P38042)	11	ANC2 (Q9UJX6), APC1 (Q9H1A4), APC10 (Q9UM13), CDC16 (Q13042), CDC23 (Q9UJX2), CDC27 (P30260), ift88 (Q13099), ogt1 (O15294)	8	2	0.75 [('ANAPHASE-PROMOTING COMPLEX-DEPENDENT PROTEASOMAL UBIQUITIN-DEPENDENT PROTEIN CATABOLIC PROCESS', '4.31e-12'), ('negative regulation of ubiquitin-protein ligase activity during mitotic cell cycle', '4.31e-12'), ('positive regulation of ubiquitin-protein ligase activity during mitotic cell cycle', '5.71e-12')]	0.88 [('cytosol', '2.70e-07')]	0.5 []
360.10.20	19/22S regulator	PRS10 (P53549), PRS4 (P40327), PRS6A (P33297), PRS6B (P33298), PRS7 (P33299), PRS8 (Q01939), PSD10 (P50086), RPN1 (P38764), RPN10 (P38886), RPN11 (P43588), RPN12 (P32496), RPN2 (P32565), RPN3 (P40016), RPN5 (Q12250), RPN6 (Q12377), RPN7 (Q06103), RPN8 (Q08723), RPN9 (Q04062)	18	PRS10 (P62333), PRS4 (P62191), PRS6A (P17980), PRS6B (P43686), PRS7 (P35998), PRS8 (P62195), PSD10 (O75832), PSD11 (O00231), PSD12 (O00232), PSD13 (Q9UNM6), PSD7 (P51665), PSDE (O00487), PSMD1 (Q99460), PSMD2 (Q13200), PSMD3 (O43242), PSMD4 (P55036), PSMD6 (Q15008), PSMD8 (P48556), ank1 (P16157-2), ank3 (Q12955), csn1 (Q13098), csn2 (P61201), csn4 (Q9BT78), csn5 (Q92905), csn6 (Q7L5N1), eif3f (O0…	29	11	0.62 [('anaphase-promoting complex-dependent proteasomal ubiquitin-dependent protein catabolic process', '1.10e-15'), ('negative regulation of ubiquitin-protein ligase activity during mitotic cell cycle', '1.10e-15'), ('positive regulation of ubiquitin-protein ligase activity during mitotic cell cycle', '1.10e-15')]	0.76 [('cytosol', '1.10e-15')]	0.72 [('protein binding', '3.26e-05')]
520.5	Signal recognition particle receptor (SR)	SRPB (P36057), SRPR (P32916)	2	SRPR (P08240), srp54 (P61011), srprb (Q9Y5M8)	3	2	0.33 [('SRP-DEPENDENT COTRANSLATIONAL PROTEIN TARGETING TO MEMBRANE', '9.41e-03'), ('SRP-dependent cotranslational protein targeting to membrane, signal sequence recognition', '1.88e-03'), ('SRP-dependent cotranslational protein targeting to membrane, translocation', '1.88e-03')]	0.67 []	1.0 [('GTP BINDING', '1.09e-04')]
133.3	Kin28p complex	CCL1 (P37366), KIN28 (P06242)	2	CCNH (P51946), CDK7 (P50613), ccnc (P24863), cd2l2 (Q9UQ88), cdc2 (P06493)	5	3	0.6 [('protein amino acid phosphorylation', '1.31e-03')]	0.6 [('nucleoplasm', '6.13e-04')]	0.8 []
140.20.10	Actins	ACT (P60010)	1	ACTB (P60709), ACTG (P63261), actc (P68032)	3	1	0.67 [('cell motion', '1.04e-03')]	0.33 [('I band', '1.29e-02'), ('MLL5-L complex', '1.51e-02'), ('actomyosin, actin part', '2.15e-03')]	1.0 [('ATP binding', '9.14e-03')]
390	Pyruvate dehydrogenase	DLDH (P09624), ODP2 (P12695), ODPA (P16387), ODPB (P32473), ODPX (P16451)	5	ODP2 (P10515), ODPA (P08559), ODPAT (P29803), ODPB (P11177), ODPX (O00330), odbb (P21953), odo2 (P36957)	7	2	0.57 [('glycolysis', '7.78e-09'), ('oxidation reduction', '3.33e-05')]	0.71 [('mitochondrial matrix', '2.69e-09')]	0.71 []
410.40.60	DNA polymerase alpha (I) - primase complex	DPOA (P13382), DPOA2 (P38121), PRI1 (P10363), PRI2 (P20457)	4	DPOA2 (Q14181), DPOD1 (P28340), DPOLA (P09884), PRI1 (P49642), PRI2 (P49643), dpolz (O60673)	6	1	0.33 [('DNA replication, synthesis of RNA primer', '1.45e-06'), ('DNA synthesis during DNA repair', '5.21e-05'), ('S phase of mitotic cell cycle', '8.69e-06')]	0.83 [('nucleoplasm', '5.67e-07')]	0.83 [('DNA BINDING', '2.06e-05')]
260.9	Arp2p/Arp3p complex	ARP2 (P32381), ARP3 (P47117), ARPC2 (P53731), ARPC3 (Q05933), ARPC4 (P33204), ARPC5 (P40518)	6	ARP2 (P61160), ARP3 (P61158), ARP5L (Q9BPX5), ARPC2 (O15144), ARPC3 (O15145), ARPC4 (P59998), actb (P60709), actc (P68032), actg (P63261), arp3b (Q9P1U1)	10	4	0.6 [('cell motion', '4.30e-11')]	0.7 [('cytoplasm', '7.54e-04')]	0.7 [('ACTIN BINDING', '3.63e-10')]
220	H+-transporting ATPase, vacuolar	STV1 (P37296), VA0D (P32366), VATA (P17255), VATB (P16140), VATC (P31412), VATD (P32610), VATE (P22203), VATF (P39111), VATG (P48836), VATH (P41807), VATL1 (P25515), VATL2 (P32842), VATO (P23968), VPH1 (P32563)	14	VA0D1 (P61421), VATB1 (P15313), VATD (Q9Y5K8), VATF (Q16864), atpb (P06576), vata (P38606), vatb2 (P21281), vatg1 (O75348), vatg2 (O95670), vath (Q9UI12), vpp4 (Q9HBG4)	11	7	0.82 [('ATP synthesis coupled proton transport', '1.32e-15')]	0.36 [('proton-transporting V-type ATPase, V1 domain', '4.62e-11'), ('vacuolar proton-transporting V-type ATPase complex', '3.08e-12')]	0.64 [('PROTON-TRANSPORTING ATPASE ACTIVITY, ROTATIONAL MECHANISM', '1.32e-15')]
500.10.110	eIF4E/eIF4G/Pab1p complex	IF4E (P07260), IF4F1 (P39935), PABP (P04147)	3	IF4E (P06730), IF4G1 (Q04637), if4e2 (O60573), pabp1 (P11940), pabp4 (Q13310)	5	3	0.4 [('REGULATION OF TRANSLATION', '4.47e-04'), ('TRANSLATIONAL INITIATION', '6.75e-04'), ('translation', '2.86e-03')]	0.6 [('cytosol', '1.76e-02')]	0.8 []
420.3	Cytochrome bc1 complex (Ubiquinol-cytochrome c reductase complex, complex III)	CY1 (P07143), CYB (P00163), QCR1 (P07256), QCR10 (P37299), QCR2 (P07257), QCR6 (P00127), QCR7 (P00128), QCR8 (P08525), QCR9 (P22289), UCRI (P08067)	10	CYB (P00156), UCRI (P47985), cy1 (P08574), mppa (Q10713), mppb (O75439), qcr1 (P31930), qcr2 (P22695)	7	5	0.71 [('TRANSPORT', '7.98e-08')]	0.43 [('mitochondrial inner membrane', '2.96e-05')]	0.57 [('metalloendopeptidase activity', '1.50e-07'), ('zinc ion binding', '2.50e-02')]
510.1	TFIIH	CCL1 (P37366), KIN28 (P06242), RAD25 (Q00578), RAD3 (P06839), SSL1 (Q04673), TFB1 (P32776), TFB2 (Q02939), TFB3 (Q03290), TFB4 (Q12004)	9	CCNH (P51946), CDK7 (P50613), ERCC2 (P18074), MAT1 (P51948), ccnc (P24863), cd2l2 (Q9UQ88), cdc2 (P06493)	7	3	0.57 [('RNA elongation from RNA polymerase II promoter', '6.16e-08'), ('TRANSCRIPTION INITIATION FROM RNA POLYMERASE II PROMOTER', '2.39e-07'), ('nucleotide-excision repair, DNA damage removal', '2.27e-09'), ('positive regulation of transcription from RNA polymerase II promoter', '7.95e-07')]	0.57 [('nucleoplasm', '1.35e-04')]	0.57 [('ATP binding', '2.25e-02')]

## Sheet: All human predictions
Prediction of human complexes by aligning yeast complexes to the human interactome (all predictions). #QCC/#TCC: number of query/target complex components; only significant GO terms are shown; those GO terms that also belong to the set of most abundant significant GO terms of the given query complex are highlighted in capitals; complexes are sorted by homogeneity, followed by the fraction and num…
Query complex ID	Query complex name	Query complex components	#QCC	Target complex components	#TCC	New	Biological process homogeneity	Cellular component homogeneity	Molecular function homogeneity
250	Isocitrate dehydrogenase	IDH1 (P28834), IDH2 (P28241)	2	IDH3G (P51553), idh3a (P50213), idh3b (O43837), idh3b (O43837-2)	4	3	1.0 [('OXIDATION REDUCTION', '1.76e-06'), ('TRICARBOXYLIC ACID CYCLE', '7.97e-11')]	1.0 [('mitochondrial matrix', '2.91e-08')]	1.0 [('ISOCITRATE DEHYDROGENASE (NAD+) ACTIVITY', '1.09e-14'), ('MAGNESIUM ION BINDING', '4.38e-06'), ('MANGANESE ION BINDING', '4.27e-08'), ('NAD OR NADH BINDING', '1.91e-10')]
510.40.20	Kornberg's mediator (SRB) complex	DMC1 (P25453), MED10 (Q06213), MED11 (Q99278), MED14 (P19263), MED15 (P19659), MED16 (P32259), MED17 (P32569), MED18 (P32585), MED19 (P25046), MED2 (Q12124), MED20 (P34162), MED21 (P47822), MED22 (P32570), MED3 (P40356), MED4 (Q12343), MED5 (P53114), MED6 (P38782), MED7 (Q08278), MED8 (P38304), MED9 (P33308), TAF14 (P35189)	21	RAD51 (Q06609), dmc1 (Q14565)	2	1	1.0 [('reciprocal meiotic recombination', '6.57e-06')]	1.0 [('condensed nuclear chromosome', '3.77e-06')]	1.0 []
410.40.140	Topoisomerases	TOP1 (P04786), TOP2 (P06786)	2	TOP2A (P11388), TOP2B (Q02880)	2	0	1.0 [('DNA TOPOLOGICAL CHANGE', '1.61e-06')]	1.0 [('chromosome', '8.50e-05'), ('nucleoplasm', '7.71e-03')]	1.0 [('DNA TOPOISOMERASE (ATP-HYDROLYZING) ACTIVITY', '4.83e-07'), ('chromatin binding', '3.35e-04'), ('histone deacetylase binding', '3.06e-05'), ('protein C-terminus binding', '1.00e-03'), ('protein heterodimerization activity', '1.31e-03'), ('protein kinase C binding', '1.69e-05')]
180.3	Geranylgeranyltransferase II (GGTase II)	PGTA (Q00618), PGTB2 (P20133), RAEP (P32864)	3	FNTA (P49354), FNTB (P49356)	2	0	1.0 [('protein amino acid farnesylation', '4.83e-08')]	1.0 [('microtubule associated complex', '2.87e-05')]	1.0 [('protein farnesyltransferase activity', '4.83e-08')]
510.180.10.10	NEF1 complex	RAD1 (P06777), RAD10 (P06838), RAD14 (P28519)	3	ERCC1 (P07992), XPA (P23025), XPF (Q92889)	3	0	1.0 [('nucleotide-excision repair, DNA damage removal', '1.73e-08')]	1.0 [('nucleoplasm', '6.39e-05')]	1.0 [('DAMAGED DNA BINDING', '4.75e-08')]
510.5	TFIIA	TOA1 (P32773), TOA2 (P32774)	2	T2AG (P52657), TF2AA (P52655)	2	0	1.0 [('RNA elongation from RNA polymerase II promoter', '1.33e-04'), ('TRANSCRIPTION INITIATION FROM RNA POLYMERASE II PROMOTER', '2.60e-04'), ('general transcription from RNA polymerase II promoter', '3.86e-07')]	1.0 [('TRANSCRIPTION FACTOR TFIIA COMPLEX', '7.73e-07')]	1.0 [('GENERAL RNA POLYMERASE II TRANSCRIPTION FACTOR ACTIVITY', '2.70e-05'), ('TATA-binding protein binding', '7.73e-07'), ('protein heterodimerization activity', '1.05e-03'), ('transcription coactivator activity', '1.72e-03')]
320	Nucleosomal protein complex	H2A1 (P04911), H2A2 (P04912), H2B1 (P02293), H2B2 (P02294), H3 (P61830), H4 (P02309)	6	CENPA (P49450), H31 (P68431), H31T (Q16695), H32 (Q71DI3), H33 (P84243), H4 (P62805)	6	0	1.0 [('NUCLEOSOME ASSEMBLY', '3.66e-14')]	1.0 [('nucleosome', '5.07e-15')]	1.0 [('DNA BINDING', '1.02e-07')]
420.6	other respiration chain complexes	ALDH4 (P46367), CISY1 (P00890), CYB2 (P00175), DHSA (Q00711), DLD1 (P32891), ETFA (Q12480), ETFB (P42940), ETFD (Q08822), FUMH (P08417), GPDM (P32191), MDHM (P17505), NDH1 (P40215), NDH2 (Q07500), NDI1 (P32340)	14	ETFA (P13804), ETFB (P38117)	2	0	1.0 [('electron transport chain', '2.80e-05'), ('transport', '9.25e-04')]	1.0 [('MITOCHONDRIAL MATRIX', '2.64e-04')]	1.0 [('electron carrier activity', '4.08e-04')]
510.180.50.30	MLH1/PMS1 complex	MLH1 (P38920)	1	MLH1 (P40692), PMS2 (P54278)	2	0	1.0 [('mismatch repair', '1.22e-05')]	1.0 []	1.0 []
340	Phosphofructokinase	K6PF1 (P16861), K6PF2 (P16862)	2	K6PF (P08237), K6PL (P17858), K6PP (Q01813)	3	0	1.0 [('GLYCOLYSIS', '1.08e-07')]	1.0 [('6-PHOSPHOFRUCTOKINASE COMPLEX', '2.17e-11')]	1.0 [('6-PHOSPHOFRUCTOKINASE ACTIVITY', '2.17e-11'), ('ATP binding', '5.71e-03'), ('MAGNESIUM ION BINDING', '1.12e-04')]
520.2	Oligosaccharyltransferase	OST1 (P41543), OST2 (P46964), OST3 (P48439), OST4 (Q99380), OST5 (Q92316), OST6 (Q03723), OSTB (P33767), OSTD (Q02795), STT3 (P39007)	9	OST48 (P39656), RPN1 (P04843), STT3A (P46977), STT3B (Q8TCJ2)	4	0	1.0 [('protein amino acid N-linked glycosylation via asparagine', '7.84e-13')]	1.0 [('INTEGRAL TO MEMBRANE', '7.02e-04'), ('OLIGOSACCHARYLTRANSFERASE COMPLEX', '7.84e-13')]	1.0 [('DOLICHYL-DIPHOSPHOOLIGOSACCHARIDE-PROTEIN GLYCOTRANSFERASE ACTIVITY', '2.18e-13')]
330	Phenylalaninine-tRNA-ligase	SYFA (P15625), SYFB (P15624), SYFM (P08425)	3	SYFA (Q9Y285), SYFB (Q9NSD9)	2	0	1.0 [('PHENYLALANYL-TRNA AMINOACYLATION', '8.05e-08')]	1.0 [('soluble fraction', '8.88e-04')]	1.0 [('PHENYLALANINE-TRNA LIGASE ACTIVITY', '8.05e-08')]
380	Pyruvate kinase	KPYK1 (P00549), KPYK2 (P52489)	2	KPYM (P14618)	1	0	1.0 [('programmed cell death', '1.61e-03')]	1.0 []	1.0 [('PYRUVATE KINASE ACTIVITY', '1.61e-03')]
480.2	SPB associated proteins	AME1 (P38313), ARP1 (P38696), BIK1 (P11709), CIK1 (Q01649), DYHC (P36022), JNM1 (P36224), KAR3 (P17119), KAR5 (Q04746), NDC80 (P40460), NUF2 (P33895), SPC19 (Q03954), SPC34 (P36131), STU1 (P38198), STU2 (P46675)	14	NDC80 (O14777), NUF2 (Q9BZD4)	2	0	1.0 [('CELL DIVISION', '1.52e-03')]	1.0 [('Ndc80 complex', '4.83e-07'), ('condensed chromosome kinetochore', '4.79e-05')]	1.0 []
260.50.10	t-SNAREs	PEP12 (P32854), SEC20 (P28791), SED5 (Q01590), SSO1 (P32867), SSO2 (P39926), TLG1 (Q03322), TLG2 (Q08144), UFE1 (P41834)	8	STX1A (Q16623)	1	0	1.0 [('regulation of insulin secretion', '3.77e-03')]	1.0 []	1.0 [('SNAP RECEPTOR ACTIVITY', '9.69e-03')]
360.10.10	20S proteasome	PSA1 (P40302), PSA2 (P23639), PSA3 (P21242), PSA4 (P23638), PSA5 (P32379), PSA6 (P21243), PSA7 (P40303), PSB1 (P23724), PSB2 (P22141), PSB3 (P25451), PSB4 (P30657), PSB5 (P30656), PSB6 (P38624), PSB7 (P25043), UMP1 (P38293)	15	PSA1 (P25786), PSA1 (P25786-2), PSA2 (P25787), PSA3 (P25788), PSA3 (P25788-2), PSA4 (P25789), PSA5 (P28066), PSA6 (P60900), PSA7 (O14818), PSB1 (P20618), PSB10 (P40306), PSB2 (P49721), PSB3 (P49720), PSB4 (P28070), PSB5 (P28074), PSB6 (P28072), PSB7 (Q99436), PSB8 (P28062), PSB8 (P28062-2), PSB9 (P28065), PSB9 (P28065-2), Q5JNW7 (Q5JNW7), Q5QNR8 (Q5QNR8), Q86U62 (Q86U62)	24	0	0.88 [('anaphase-promoting complex-dependent proteasomal ubiquitin-dependent protein catabolic process', '1.32e-15'), ('negative regulation of ubiquitin-protein ligase activity during mitotic cell cycle', '1.32e-15'), ('positive regulation of ubiquitin-protein ligase activity during mitotic cell cycle', '1.32e-15')]	1.0 [('cytosol', '1.32e-15'), ('proteasome core complex', '1.32e-15')]	1.0 [('THREONINE-TYPE ENDOPEPTIDASE ACTIVITY', '1.32e-15')]
140.30.10	Tubulins	TBA1 (P09733), TBA3 (P09734), TBB (P02557), TBG (P53378)	4	TBA1B (P68363), TBA1C (Q9BQE3), TBA3C (Q13748), TBA4A (P68366), TBA8 (Q9NY65), TBB5 (P07437), tba1a (Q71U36)	7	1	1.0 [('PROTEIN POLYMERIZATION', '1.32e-15'), ('microtubule-based movement', '1.32e-15')]	0.86 [('PROTEIN COMPLEX', '2.45e-12'), ('microtubule', '4.61e-10')]	1.0 [('GTP BINDING', '3.43e-11'), ('GTPASE ACTIVITY', '1.02e-12')]
500.10.30	eIF2B	EI2BA (P14741), EI2BB (P32502), EI2BD (P12754), EI2BE (P32501), EI2BG (P09032)	5	EI2BA (Q14232), EI2BB (P49770), EI2BD (Q9UI10), EI2BE (Q13144), EI2BG (Q9NR50), q9bpx4 (Q9BPX4)	6	1	1.0 [('response to glucose stimulus', '1.10e-15'), ('response to heat', '1.10e-15'), ('response to peptide hormone stimulus', '1.10e-15')]	0.83 [('EUKARYOTIC TRANSLATION INITIATION FACTOR 2B COMPLEX', '1.10e-15')]	1.0 [('TRANSLATION INITIATION FACTOR ACTIVITY', '4.32e-14')]
133.1	Cdc28p complexes	CDC28 (P00546), CG11 (P20437), CG12 (P20438), CG13 (P13365), CG21 (P24868), CG22 (P24869), CG23 (P24870), CG24 (P24871), CGS5 (P30283), CGS6 (P32943)	10	CCNB1 (P14635), CCNB2 (O95067), CDC2 (P06493), ccna1 (P78396), cdk2 (P24941)	5	2	1.0 [('CELL DIVISION', '6.23e-09'), ('mitosis', '1.60e-09')]	1.0 [('cytosol', '6.14e-06')]	0.8 []
260.20.20	AP-2 complex	AP2A (P38065), AP2B (P27351), AP2M (Q99186), AP2S (Q00381)	4	AP1B1 (Q10567), AP1G1 (O43747), AP1M1 (Q9BXS5), AP2B1 (P63010), AP2M1 (Q96CW1), ap2a1 (O95782), ap2a1 (O95782-2), ap2a2 (O94973)	8	3	1.0 [('INTRACELLULAR PROTEIN TRANSPORT', '1.06e-15')]	1.0 [('cytosol', '1.47e-09')]	0.75 [('protein transporter activity', '6.38e-13')]
500.20.10	eEF1	EF1A (P02994), EF1B (P32471), EF1G1 (P29547), EF1G2 (P36008), HBS1 (P32769)	5	EF1A1 (P68104), EF1B (P24534), EF1D (P29692), EF1G (P26641), Q96I38 (Q96I38), Q9H7G6 (Q9H7G6), ef1a2 (Q05639)	7	1	0.86 [('TRANSLATIONAL ELONGATION', '5.59e-12')]	0.86 [('EUKARYOTIC TRANSLATION ELONGATION FACTOR 1 COMPLEX', '6.60e-16')]	1.0 [('TRANSLATION ELONGATION FACTOR ACTIVITY', '6.60e-16')]
410.35	Replication complex	CDC45 (Q08032), CDC47 (P38132), CDC54 (P30665), DPB11 (P47027), DPB2 (P24482), DPB3 (P27344), DPOD (P15436), DPOD2 (P46957), DPOD3 (P47110), DPOE (P21951), MCM2 (P29469), MCM3 (P24279), MCM5 (P29496), MCM6 (P53091), ORC1 (P54784), ORC2 (P32833), ORC3 (P54790), ORC4 (P54791), ORC5 (P50874), ORC6 (P38826)	20	MCM2 (P49736), MCM3 (P25205), MCM4 (P33991), MCM5 (P33992), MCM6 (Q14566), MCM7 (P33993), q9h4n9 (Q9H4N9)	7	1	1.0 [('DNA REPLICATION INITIATION', '6.60e-16')]	0.71 [('nucleoplasm', '9.70e-07')]	1.0 [('ATP binding', '4.05e-07')]
430	Ribonucleoside-diphosphate reductase	RIR1 (P21524), RIR2 (P09938), RIR3 (P21672), RIR4 (P49723)	4	RIR1 (P23921), rir2 (P31350), rir2b (Q7LG56)	3	2	1.0 [('OXIDATION REDUCTION', '3.39e-05')]	0.67 []	1.0 [('RIBONUCLEOSIDE-DIPHOSPHATE REDUCTASE ACTIVITY', '1.30e-11')]
510.180.50.10	MSH2/MSH3 complex	MSH2 (P25847), MSH3 (P25336), PMS1 (P14242)	3	MSH2 (P43246), MSH3 (P20585), msh4 (O15457)	3	1	1.0 [('mismatch repair', '1.48e-08')]	0.67 [('MUTSBETA COMPLEX', '1.45e-07')]	1.0 [('ATP BINDING', '3.43e-03')]
510.16	CCAAT-binding factor complex	HAP2 (P06774), HAP3 (P13434), HAP4 (P14064), HAP5 (Q02516)	4	NFYA (P23511), NFYB (P25208), NFYC (Q13952)	3	0	0.67 []	1.0 [('CCAAT-BINDING FACTOR COMPLEX', '5.20e-11')]	1.0 [('transcription factor activity', '5.12e-04')]
510.180.50.20	MSH2/MSH6 complex	MSH2 (P25847), MSH6 (Q03834)	2	MSH2 (P43246), MSH3 (P20585), MSH6 (P52701)	3	0	1.0 [('negative regulation of DNA recombination', '2.17e-11'), ('positive regulation of helicase activity', '4.33e-10')]	0.67 [('MUTSALPHA COMPLEX', '2.42e-07'), ('MutSbeta complex', '2.42e-07')]	1.0 [('ATP binding', '5.71e-03')]
440.12.10	Exosome complex	RRP4 (P38792), RRP41 (P46948), RRP42 (Q12277), RRP43 (P25359), RRP44 (Q08162), RRP45 (Q05636), RRP46 (P53256)	7	EXOS2 (Q13868), EXOS4 (Q9NPD3), EXOS5 (Q9NQT4), EXOS7 (Q15024), EXOS8 (Q96B26), EXOS9 (Q06265), RRP44 (Q9Y2L1), di3l2 (Q8IYB7)	8	1	0.88 [('rRNA processing', '1.49e-15')]	0.88 [('NUCLEOLUS', '4.98e-10')]	0.88 [('RNA BINDING', '1.91e-09')]
410.2	Replication initiation complex	CDC7 (P06243), DBF4 (P32325), ORC1 (P54784), ORC2 (P32833), ORC3 (P54790), ORC4 (P54791), ORC5 (P50874), ORC6 (P38826)	8	ORC1 (Q13415), ORC2 (Q13416), ORC4 (O43929), ORC5 (O43913), cdc6 (Q99741)	5	1	0.8 [('DNA REPLICATION INITIATION', '5.66e-11')]	1.0 [('nucleoplasm', '6.45e-08')]	0.8 [('ATP binding', '2.19e-03')]
110	cAMP-dependent protein kinase	KAPA (P06244), KAPB (P06245), KAPC (P05986), KAPR (P07278)	4	KAP1 (P31321), KAP2 (P13861), KAP3 (P31323), KAPCA (P17612), KAPCB (P22694)	5	0	1.0 [('hormone-mediated signaling', '9.07e-13')]	1.0 [('CAMP-DEPENDENT PROTEIN KINASE COMPLEX', '8.80e-16')]	0.6 [('cAMP binding', '3.81e-08'), ('cAMP-dependent protein kinase regulator activity', '4.95e-08')]
75	Arginase	ARGI (P00812)	1	argi1 (P05089), argi2 (P78540)	2	2	1.0 [('urea cycle', '1.69e-06')]	0.5 []	1.0 [('ARGINASE ACTIVITY', '8.05e-08'), ('manganese ion binding', '3.98e-04')]
260.30.90	other coat complexes	SEC7 (P11075)	1	big1 (Q9Y6D6), big2 (Q9Y6D5)	2	2	1.0 [('REGULATION OF ARF PROTEIN SIGNAL TRANSDUCTION', '2.03e-06'), ('exocytosis', '6.43e-05')]	0.5 []	1.0 [('ARF GUANYL-NUCLEOTIDE EXCHANGE FACTOR ACTIVITY', '2.03e-06')]
350.3	Processing peptidase	MPPA (P11914), MPPB (P10507)	2	MPPB (O75439), mppa (Q10713), qcr1 (P31930), qcr2 (P22695)	4	3	1.0 [('PROTEOLYSIS', '1.08e-06')]	0.5 [('mitochondrial inner membrane', '9.37e-04'), ('mitochondrial matrix', '1.96e-03')]	1.0 [('METALLOENDOPEPTIDASE ACTIVITY', '4.34e-09'), ('zinc ion binding', '9.59e-04')]
420.2	Succinate dehydrogenase complex (complex II)	DHSA (Q00711), DHSB (P21801), DHSD (P37298), SDH3 (P33421)	4	DHSA (P31040), dhsb (P21912)	2	1	1.0 [('TRANSPORT', '1.62e-03'), ('TRICARBOXYLIC ACID CYCLE', '2.60e-05')]	0.5 [('MITOCHONDRIAL RESPIRATORY CHAIN COMPLEX II', '1.26e-03')]	1.0 [('SUCCINATE DEHYDROGENASE (UBIQUINONE) ACTIVITY', '1.13e-07'), ('electron carrier activity', '7.13e-04')]
80	Arginine-specific carbamoylphosphate synthase	CARA (P07258), CARB (P03965)	2	CPSM (P31327), pyr1 (P27708)	2	1	1.0 [('glutamine metabolic process', '4.43e-06')]	0.5 [('mitochondrial nucleoid', '2.33e-02')]	1.0 []
410.40.30	Replication factor C complex	RFC1 (P38630), RFC2 (P40348), RFC3 (P38629), RFC4 (P40339), RFC5 (P38251)	5	CTF18 (Q8WVB6), RFC1 (P35251), RFC2 (P35250), RFC3 (P40938), RFC4 (P35249), RFC5 (P40937)	6	0	0.83 [('nucleotide-excision repair, DNA gap filling', '1.30e-13')]	0.83 [('DNA REPLICATION FACTOR C COMPLEX', '1.10e-15'), ('nucleoplasm', '4.73e-07')]	0.83 [('ATP BINDING', '3.41e-04'), ('DNA clamp loader activity', '1.10e-15')]
260.30.30.10	Vps35/Vps29/Vps26 complex	PEP11 (P38759), VPS26 (P40335), VPS35 (P34110)	3	VPS29 (Q9UBQ0), VPS35 (Q96QK1)	2	0	1.0 [('PROTEIN TRANSPORT', '2.48e-03')]	1.0 [('ENDOSOME', '6.01e-04'), ('membrane', '5.77e-03')]	0.5 [('phosphoserine phosphatase activity', '2.15e-03')]
300	Nonsense-mediated mRNA decay pathway complex	NAM7 (P30771), NMD2 (P38798), UPF3 (P48412)	3	RENT1 (Q92900), RENT2 (Q9HAU5)	2	0	1.0 [('mRNA export from nucleus', '3.11e-05'), ('nuclear-transcribed mRNA catabolic process, nonsense-mediated decay', '4.26e-05')]	0.5 [('cytoplasmic mRNA processing body', '2.38e-02')]	1.0 [('RNA binding', '9.31e-03')]
310.3	NSP1-NIC96 complex	NSP1 (P14907)	1	NU153 (P49790), NUP62 (P37198)	2	0	1.0 [('intracellular protein transmembrane transport', '4.28e-04'), ('mRNA transport', '2.72e-04')]	1.0 [('nuclear pore', '3.99e-04')]	0.5 [('STRUCTURAL CONSTITUENT OF NUCLEAR PORE', '1.61e-02')]
260.30.10	COPI	ARF1 (P11076), COPA (P53622), COPB (P41810), COPB2 (P41811), COPD (P43621), COPE (P40509), COPG (P32074), COPZ (P53600)	8	COPA (P53621), COPB (P53618), COPB2 (P35606), COPD (P48444), COPG (Q9Y678), COPG2 (Q9UBF2), COPZ1 (P61923), COPZ2 (Q9P299), ap1b1 (Q10567), ap2b1 (P63010), lis1 (P43034), wdr5 (P61964)	12	4	0.83 [('intracellular protein transport', '6.60e-16')]	0.75 [('cytosol', '1.83e-08')]	0.83 [('protein binding', '9.27e-04')]
140.10.20	Septin filaments	CDC10 (P25342), CDC11 (P32458), CDC12 (P32468), CDC3 (P32457), SHS1 (Q07657), SPR28 (Q04921), SPR3 (P41901)	7	SEPT9 (Q9UHD8-2), SEPT9 (Q9UHD8-3), q99648 (Q99648), sept4 (O43236), sept7 (Q16181)	5	3	0.8 [('CELL CYCLE', '1.81e-06')]	0.6 [('plasma membrane', '1.64e-02'), ('stress fiber', '1.21e-07')]	1.0 [('GTP BINDING', '4.74e-08'), ('protein binding', '1.52e-02')]
510.180.20	other DNA repair complexes	RAD51 (P25454), RAD52 (P06778), RAD54 (P32863), RAD55 (P38953), RAD57 (P25301)	5	RAD51 (Q06609), dmc1 (Q14565), rad52 (P43351)	3	2	1.0 [('reciprocal meiotic recombination', '1.47e-08')]	0.67 [('condensed nuclear chromosome', '1.88e-05')]	0.67 []
260.20.30	AP-3 complex	AP3B (P46682), AP3D (Q08951), AP3M (P38153), AP3S (P47064)	4	AP3B1 (O00203), AP3B2 (Q13367), AP3D1 (O14617), AP3M1 (Q9Y2T2), AP3S1 (Q92572), AP3S2 (P59780), ap1g1 (O43747), ap4e1 (Q9UPM8), ap4s1 (Q9Y587)	9	3	0.78 [('INTRACELLULAR PROTEIN TRANSPORT', '3.28e-12')]	0.67 [('GOLGI APPARATUS', '2.21e-07')]	0.89 [('protein binding', '1.81e-03')]
500.10.50	eIF4A	IF4A (P10081)	1	IF4A1 (P60842), IF4A2 (Q14240), if4a3 (P38919)	3	1	0.67 [('translation', '7.22e-04')]	0.67 [('EUKARYOTIC TRANSLATION INITIATION FACTOR 4F COMPLEX', '8.69e-06')]	1.0 [('ATP binding', '5.71e-03')]
510.190.40	NOT complex	NOT1 (P25655), NOT2 (P06100), NOT3 (P06102), NOT4 (P34909), NOT5 (Q12514)	5	CNOT1 (A5YKK6), CNOT3 (O75175), cnot4 (O95628)	3	1	1.0 [('regulation of transcription', '2.95e-04'), ('transcription', '5.10e-03')]	0.67 []	0.67 []
510.14	TFIIIB	TBP (P13393), TF3B (P29056), TFC5 (P46678)	3	TBP (P20226), TF3B (Q92994), tbpl1 (P62380)	3	1	1.0 [('REGULATION OF TRANSCRIPTION, DNA-DEPENDENT', '1.71e-04')]	0.67 [('transcription factor TFIID complex', '1.74e-05')]	0.67 []
120.2	Casein kinase II	CSK21 (P15790), CSK22 (P19454), CSK2B (P43639), CSK2C (P38930)	4	CSK21 (P68400), CSK22 (P19784), CSK2B (P67870)	3	0	1.0 [('Wnt receptor signaling pathway', '2.06e-06')]	0.33 [('NuRD complex', '1.61e-02'), ('PROTEIN KINASE CK2 COMPLEX', '1.62e-03'), ('Sin3 complex', '1.29e-02')]	1.0 [('protein serine/threonine kinase activity', '5.92e-05')]
140.20.30	Actin-associated motorproteins	MYO1 (P08964), MYO2 (P19524), MYO3 (P36006), MYO4 (P32492), MYO5 (Q04439), SMY1 (P32364), SMY2 (P32909)	7	MYO5A (Q9Y4I1), MYO5B (Q9ULV0), MYO5C (Q9NQX4)	3	0	0.33 [('actin filament-based movement', '1.08e-02')]	1.0 [('MYOSIN COMPLEX', '4.98e-08')]	1.0 [('ATP BINDING', '5.71e-03'), ('calmodulin binding', '7.75e-06')]
475.05	Sister chromatid cohesion complex	REC8 (Q12188), SCC1 (Q12158), SCC2 (Q04002), SCC3 (P40541), SMC1 (P32908), SMC3 (P47037)	6	SMC1A (Q14683), SMC3 (Q9UQE7), STAG1 (Q8WVM7), STAG2 (Q8N3U4), smc1b (Q8NDV3), smc2 (O95347), smc4 (Q9NTJ3)	7	3	0.86 [('CELL DIVISION', '5.50e-10')]	0.71 [('cytoplasm', '5.76e-03')]	0.71 [('ATP binding', '6.53e-04')]
500.10.40	eIF3	EIF3A (P38249), EIF3B (P06103), EIF3C (P32497), EIF3G (Q04067), EIF3I (P40217), SUI1 (P32911), TRM6 (P41814)	7	EIF3A (Q14152), EIF3B (P55884), EIF3C (Q99613), EIF3G (O75821), EIF3I (Q13347), eif1 (P41567), eif1b (O60739), strap (Q9Y3F4)	8	3	0.75 [('TRANSLATIONAL INITIATION', '1.16e-13')]	0.63 [('EUKARYOTIC TRANSLATION INITIATION FACTOR 3 COMPLEX', '3.12e-13'), ('cytosol', '2.88e-04')]	0.88 [('TRANSLATION INITIATION FACTOR ACTIVITY', '1.16e-15')]
410.40.90	DNA polymerase delta (III)	DPOD (P15436), DPOD2 (P46957), DPOD3 (P47110)	3	DPOD1 (P28340), DPOD2 (P49005), DPOLA (P09884), dpolz (O60673)	4	1	0.5 [('DNA synthesis during DNA repair', '2.09e-05'), ('S phase of mitotic cell cycle', '3.48e-06'), ('nucleotide-excision repair, DNA gap filling', '7.87e-05')]	0.75 [('nucleoplasm', '5.01e-04')]	1.0 [('DNA binding', '6.34e-05'), ('DNA-DIRECTED DNA POLYMERASE ACTIVITY', '9.92e-11')]
510.40.10	RNA polymerase II	CDC73 (Q06697), RPAB1 (P20434), RPAB2 (P20435), RPAB3 (P20436), RPAB4 (P40422), RPAB5 (P22139), RPB1 (P04050), RPB11 (P38902), RPB2 (P08518), RPB3 (P16370), RPB4 (P20433), RPB7 (P34087), RPB9 (P27999)	13	RPAB1 (P19388), RPAB2 (P61218), RPAB3 (P52434), RPAB5 (P62875), RPB1 (P24928), RPB11 (P52435), RPB2 (P30876), RPB3 (P19387), RPB4 (O15514), RPB7 (P62487), RPB9 (P36954), q9bsr4 (Q9BSR4), rpa1 (O95602), rpac1 (O15160), rpc1 (O14802)	15	4	0.73 [('RNA elongation from RNA polymerase II promoter', '1.10e-15'), ('nuclear mRNA splicing, via spliceosome', '1.10e-15'), ('transcription initiation from RNA polymerase II promoter', '1.10e-15')]	0.47 [('nucleoplasm', '3.20e-07')]	1.0 [('DNA-DIRECTED RNA POLYMERASE ACTIVITY', '1.10e-15')]
240.2	HDB complex	RPD3 (P32561), SAP30 (P38429), SIN3 (P22579)	3	HDAC1 (Q13547), HDAC2 (Q92769), SIN3A (Q96ST3), SIN3B (O75182), hdac3 (O15379)	5	1	1.0 [('TRANSCRIPTION', '5.15e-05')]	0.6 [('Sin3 complex', '1.21e-08')]	0.6 [('HISTONE DEACETYLASE ACTIVITY', '1.47e-07'), ('transcription factor binding', '2.60e-05')]
510.190.150	Sin3 complex	RPD3 (P32561), SIN3 (P22579), STB1 (P42845), STB2 (P46679)	4	HDAC1 (Q13547), HDAC2 (Q92769), SIN3A (Q96ST3), SIN3B (O75182), hdac3 (O15379)	5	1	1.0 [('transcription', '5.15e-05')]	0.6 [('SIN3 COMPLEX', '1.21e-08')]	0.6 [('histone deacetylase activity', '1.47e-07'), ('transcription factor binding', '2.60e-05')]
510.70.20	TAFIIs	TAF1 (P46677), TAF10 (Q12030), TAF11 (Q04226), TAF12 (Q03761), TAF13 (P11747), TAF14 (P35189), TAF2 (P23255), TAF3 (Q12297), TAF5 (P38129), TAF6 (P53040), TAF7 (Q05021), TAF9 (Q05027)	12	TAF1 (P21675), TAF10 (Q12962), TAF11 (Q15544), TAF12 (Q16514), TAF12 (Q16514-2), TAF1L (Q8IZX4), TAF2 (Q6P1X5), TAF5 (Q15542), TAF6 (P49848), TAF7 (Q15545), TAF9 (Q16594), TAF9B (Q9HBM6), nfm (P07197), taf5l (O75529)	14	2	0.71 [('TRANSCRIPTION INITIATION FROM RNA POLYMERASE II PROMOTER', '6.60e-16')]	0.86 [('TRANSCRIPTION FACTOR TFIID COMPLEX', '6.60e-16')]	0.57 [('transcription coactivator activity', '1.55e-11')]
60	Anaphase promoting complex (APC)	APC1 (P53886), APC10 (P53068), APC11 (Q12157), APC2 (Q12440), APC4 (Q04601), APC5 (Q08683), APC9 (Q12107), CDC16 (P09798), CDC23 (P16522), CDC26 (P14724), CDC27 (P38042)	11	ANC2 (Q9UJX6), APC1 (Q9H1A4), APC10 (Q9UM13), CDC16 (Q13042), CDC23 (Q9UJX2), CDC27 (P30260), ift88 (Q13099), ogt1 (O15294)	8	2	0.75 [('ANAPHASE-PROMOTING COMPLEX-DEPENDENT PROTEASOMAL UBIQUITIN-DEPENDENT PROTEIN CATABOLIC PROCESS', '4.31e-12'), ('negative regulation of ubiquitin-protein ligase activity during mitotic cell cycle', '4.31e-12'), ('positive regulation of ubiquitin-protein ligase activity during mitotic cell cycle', '5.71e-12')]	0.88 [('cytosol', '2.70e-07')]	0.5 []
360.10.20	19/22S regulator	PRS10 (P53549), PRS4 (P40327), PRS6A (P33297), PRS6B (P33298), PRS7 (P33299), PRS8 (Q01939), PSD10 (P50086), RPN1 (P38764), RPN10 (P38886), RPN11 (P43588), RPN12 (P32496), RPN2 (P32565), RPN3 (P40016), RPN5 (Q12250), RPN6 (Q12377), RPN7 (Q06103), RPN8 (Q08723), RPN9 (Q04062)	18	PRS10 (P62333), PRS4 (P62191), PRS6A (P17980), PRS6B (P43686), PRS7 (P35998), PRS8 (P62195), PSD10 (O75832), PSD11 (O00231), PSD12 (O00232), PSD13 (Q9UNM6), PSD7 (P51665), PSDE (O00487), PSMD1 (Q99460), PSMD2 (Q13200), PSMD3 (O43242), PSMD4 (P55036), PSMD6 (Q15008), PSMD8 (P48556), ank1 (P16157-2), ank3 (Q12955), csn1 (Q13098), csn2 (P61201), csn4 (Q9BT78), csn5 (Q92905), csn6 (Q7L5N1), eif3f (O0…	29	11	0.62 [('anaphase-promoting complex-dependent proteasomal ubiquitin-dependent protein catabolic process', '1.10e-15'), ('negative regulation of ubiquitin-protein ligase activity during mitotic cell cycle', '1.10e-15'), ('positive regulation of ubiquitin-protein ligase activity during mitotic cell cycle', '1.10e-15')]	0.76 [('cytosol', '1.10e-15')]	0.72 [('protein binding', '3.26e-05')]
260.30.20	COPII	EMP24 (P32803), ERP1 (Q05359), ERP2 (P39704), ERV25 (P54837), ERV46 (P39727), SAR1 (P20606), SEC13 (Q04491), SEC16 (P48415), SEC23 (P15303), SEC24 (P40482), SEC31 (P38968)	11	TMEDA (P49755), tmed1 (Q13445), tmed2 (Q15363), tmed9 (Q9BVK6)	4	3	0.5 [('protein transport', '9.65e-03'), ('transport', '5.44e-03')]	1.0 [('integral to membrane', '7.02e-04')]	0.5 []
520.5	Signal recognition particle receptor (SR)	SRPB (P36057), SRPR (P32916)	2	SRPR (P08240), srp54 (P61011), srprb (Q9Y5M8)	3	2	0.33 [('SRP-DEPENDENT COTRANSLATIONAL PROTEIN TARGETING TO MEMBRANE', '9.41e-03'), ('SRP-dependent cotranslational protein targeting to membrane, signal sequence recognition', '1.88e-03'), ('SRP-dependent cotranslational protein targeting to membrane, translocation', '1.88e-03')]	0.67 []	1.0 [('GTP BINDING', '1.09e-04')]
133.3	Kin28p complex	CCL1 (P37366), KIN28 (P06242)	2	CCNH (P51946), CDK7 (P50613), ccnc (P24863), cd2l2 (Q9UQ88), cdc2 (P06493)	5	3	0.6 [('protein amino acid phosphorylation', '1.31e-03')]	0.6 [('nucleoplasm', '6.13e-04')]	0.8 []
140.20.10	Actins	ACT (P60010)	1	ACTB (P60709), ACTG (P63261), actc (P68032)	3	1	0.67 [('cell motion', '1.04e-03')]	0.33 [('I band', '1.29e-02'), ('MLL5-L complex', '1.51e-02'), ('actomyosin, actin part', '2.15e-03')]	1.0 [('ATP binding', '9.14e-03')]
390	Pyruvate dehydrogenase	DLDH (P09624), ODP2 (P12695), ODPA (P16387), ODPB (P32473), ODPX (P16451)	5	ODP2 (P10515), ODPA (P08559), ODPAT (P29803), ODPB (P11177), ODPX (O00330), odbb (P21953), odo2 (P36957)	7	2	0.57 [('glycolysis', '7.78e-09'), ('oxidation reduction', '3.33e-05')]	0.71 [('mitochondrial matrix', '2.69e-09')]	0.71 []
410.40.60	DNA polymerase alpha (I) - primase complex	DPOA (P13382), DPOA2 (P38121), PRI1 (P10363), PRI2 (P20457)	4	DPOA2 (Q14181), DPOD1 (P28340), DPOLA (P09884), PRI1 (P49642), PRI2 (P49643), dpolz (O60673)	6	1	0.33 [('DNA replication, synthesis of RNA primer', '1.45e-06'), ('DNA synthesis during DNA repair', '5.21e-05'), ('S phase of mitotic cell cycle', '8.69e-06')]	0.83 [('nucleoplasm', '5.67e-07')]	0.83 [('DNA BINDING', '2.06e-05')]
510.180.30.30	MRE11/RAD50/XRS2 complex	MRE11 (P32829), RAD50 (P12753), XRS2 (P33301)	3	MRE11 (P49959), RAD50 (Q92878)	2	0	1.0 [('reciprocal meiotic recombination', '3.50e-05'), ('regulation of mitotic recombination', '7.73e-07'), ('telomere maintenance via telomerase', '2.34e-05')]	0.5 [('MRE11 COMPLEX', '1.72e-02'), ('nuclear chromosome, telomeric region', '2.30e-02')]	0.5 [("3'-5' exonuclease activity", '2.30e-02'), ('nuclease activity', '1.44e-02'), ('single-stranded DNA specific endodeoxyribonuclease activity', '2.87e-03')]
260.9	Arp2p/Arp3p complex	ARP2 (P32381), ARP3 (P47117), ARPC2 (P53731), ARPC3 (Q05933), ARPC4 (P33204), ARPC5 (P40518)	6	ARP2 (P61160), ARP3 (P61158), ARP5L (Q9BPX5), ARPC2 (O15144), ARPC3 (O15145), ARPC4 (P59998), actb (P60709), actc (P68032), actg (P63261), arp3b (Q9P1U1)	10	4	0.6 [('cell motion', '4.30e-11')]	0.7 [('cytoplasm', '7.54e-04')]	0.7 [('ACTIN BINDING', '3.63e-10')]
510.12	RNA polymerase III	RPAB1 (P20434), RPAB2 (P20435), RPAB3 (P20436), RPAB4 (P40422), RPAB5 (P22139), RPAC1 (P07703), RPAC2 (P28000), RPC1 (P04051), RPC2 (P22276), RPC3 (P32349), RPC6 (P32910), RPC7 (P17890), RPC8 (P35718)	13	RPA1 (O95602), RPA2 (Q9H9Y6), RPAB1 (P19388), RPAB3 (P52434), RPAC1 (O15160), RPAC2 (Q9Y2S0), RPC1 (O14802), RPC3 (Q9BUI4), RPC8 (Q9Y535), rpab2 (P61218), rpab5 (P62875), rpb1 (P24928), rpb11 (P52435), rpb2 (P30876), rpb3 (P19387), rpc6 (Q9H1D9)	16	7	0.5 [('RNA elongation from RNA polymerase II promoter', '2.78e-15'), ('nuclear mRNA splicing, via spliceosome', '2.64e-12'), ('transcription initiation from RNA polymerase II promoter', '4.66e-14')]	0.44 [('nucleoplasm', '5.55e-07')]	1.0 [('DNA-DIRECTED RNA POLYMERASE ACTIVITY', '1.10e-15')]
510.190.110	CCR4 complex	CAF17 (P47158), CAF4 (P36130), CCR4 (P31384), DBF2 (P22204), DHH1 (P39517), MOB1 (P40484), NOT1 (P25655), NOT2 (P06100), NOT3 (P06102), NOT4 (P34909), NOT5 (Q12514), POP2 (P39008), YFC8 (P43569)	13	CNO6L (Q96LI5), CNOT1 (A5YKK6), CNOT3 (O75175), CNOT6 (Q9ULM6), CNOT7 (Q9UIV1), CNOT8 (Q9UFF9), cnot4 (O95628), ddx39 (O00148), ddx6 (P26196), if4a1 (P60842), if4a2 (Q14240), if4a3 (P38919)	12	6	0.5 [('transcription', '1.68e-03')]	0.5 [('cytoplasm', '2.27e-02')]	0.92 [('protein binding', '7.34e-05')]
470.2	STE5-MAPK complex	FUS3 (P16892), KSS1 (P14681), STE11 (P23561), STE5 (P32917), STE7 (P06784)	5	MP2K1 (Q02750), MP2K2 (P36507), m3k1 (Q13233), m3k2 (Q9Y2U5), m3k3 (Q99759), mk01 (P28482), mk03 (P27361), mk07 (Q13164), mk14 (Q16539), mp2k5 (Q13163)	10	8	0.5 [('Ras protein signal transduction', '1.98e-09')]	0.4 [('cytosol', '1.34e-02'), ('nucleoplasm', '4.32e-04')]	1.0 [('ATP BINDING', '6.06e-10')]
510.1	RNA polymerase I	RPA1 (P10964), RPA12 (P32529), RPA14 (P50106), RPA2 (P22138), RPA34 (P47006), RPA43 (P46669), RPA49 (Q01080), RPAB1 (P20434), RPAB2 (P20435), RPAB3 (P20436), RPAB4 (P40422), RPAB5 (P22139), RPAC1 (P07703), RPAC2 (P28000)	14	RPA1 (O95602), RPA2 (Q9H9Y6), RPAB1 (P19388), RPAB3 (P52434), RPAC1 (O15160), RPAC2 (Q9Y2S0), RPC1 (O14802), q9bsr4 (Q9BSR4), q9h6s8 (Q9H6S8), rpa12 (Q9P1U0), rpa49 (Q9GZS1), rpa49 (Q9GZS1-2), rpab2 (P61218), rpab5 (P62875), rpb1 (P24928), rpb11 (P52435), rpb3 (P19387)	17	10	0.41 [('RNA elongation from RNA polymerase II promoter', '1.19e-12'), ('nuclear mRNA splicing, via spliceosome', '4.52e-10'), ('transcription initiation from RNA polymerase II promoter', '1.36e-11')]	0.47 [('nucleolus', '6.02e-08')]	1.0 [('DNA-DIRECTED RNA POLYMERASE ACTIVITY', '1.10e-15')]
470.1	SNF1 complex	GAL83 (Q04739), SIP1 (P32578), SIP2 (P34164), SIP4 (P46954), SNF1 (P06782), SNF4 (P12904)	6	AAKB1 (Q9Y478), AAPK1 (Q13131), aakb2 (O43741), aakg1 (P54619), aakg2 (Q9UGJ0), aakg3 (Q9UGI9), aapk2 (P54646)	7	5	1.0 [('fatty acid biosynthetic process', '1.32e-15')]	0.43 [('nucleoplasm', '4.12e-03')]	0.43 [('protein kinase binding', '4.29e-05')]
220	H+-transporting ATPase, vacuolar	STV1 (P37296), VA0D (P32366), VATA (P17255), VATB (P16140), VATC (P31412), VATD (P32610), VATE (P22203), VATF (P39111), VATG (P48836), VATH (P41807), VATL1 (P25515), VATL2 (P32842), VATO (P23968), VPH1 (P32563)	14	VA0D1 (P61421), VATB1 (P15313), VATD (Q9Y5K8), VATF (Q16864), atpb (P06576), vata (P38606), vatb2 (P21281), vatg1 (O75348), vatg2 (O95670), vath (Q9UI12), vpp4 (Q9HBG4)	11	7	0.82 [('ATP synthesis coupled proton transport', '1.32e-15')]	0.36 [('proton-transporting V-type ATPase, V1 domain', '4.62e-11'), ('vacuolar proton-transporting V-type ATPase complex', '3.08e-12')]	0.64 [('PROTON-TRANSPORTING ATPASE ACTIVITY, ROTATIONAL MECHANISM', '1.32e-15')]
500.10.110	eIF4E/eIF4G/Pab1p complex	IF4E (P07260), IF4F1 (P39935), PABP (P04147)	3	IF4E (P06730), IF4G1 (Q04637), if4e2 (O60573), pabp1 (P11940), pabp4 (Q13310)	5	3	0.4 [('REGULATION OF TRANSLATION', '4.47e-04'), ('TRANSLATIONAL INITIATION', '6.75e-04'), ('translation', '2.86e-03')]	0.6 [('cytosol', '1.76e-02')]	0.8 []
230.20.40	NuA4 complex	ESA1 (Q08649), TRA1 (P38811)	2	TIP60 (Q92993), TRRAP (Q9Y4A5), frap (P42345), myst1 (Q9H7Z6)	4	2	0.75 []	0.5 [('NUA4 HISTONE ACETYLTRANSFERASE COMPLEX', '7.09e-05'), ('chromatin', '9.26e-04')]	0.5 [('chromatin binding', '1.40e-03'), ('histone acetyltransferase activity', '1.28e-04')]
310	Nuclear pore complex (NPC)	GLE2 (P40066), NOP14 (Q99207), NU100 (Q02629), NU116 (Q02630), NU133 (P36161), NU157 (P40064), NU159 (P40477), NU170 (P38181), NU188 (P52593), NUP1 (P20676), NUP2 (P32499), NUP42 (P49686), PO152 (P39685)	13	NUP98 (P52948), NUP98 (P52948-5), bub3 (O43684), rae1l (P78406)	4	2	0.5 [('DNA replication', '3.92e-03'), ('INTRACELLULAR PROTEIN TRANSMEMBRANE TRANSPORT', '1.53e-03'), ('mRNA transport', '9.76e-04'), ('nuclear pore organization', '2.61e-06'), ('protein import into nucleus, docking', '1.33e-04')]	0.5 [('Nup107-160 complex', '3.13e-05')]	0.75 []
420.3	Cytochrome bc1 complex (Ubiquinol-cytochrome c reductase complex, complex III)	CY1 (P07143), CYB (P00163), QCR1 (P07256), QCR10 (P37299), QCR2 (P07257), QCR6 (P00127), QCR7 (P00128), QCR8 (P08525), QCR9 (P22289), UCRI (P08067)	10	CYB (P00156), UCRI (P47985), cy1 (P08574), mppa (Q10713), mppb (O75439), qcr1 (P31930), qcr2 (P22695)	7	5	0.71 [('TRANSPORT', '7.98e-08')]	0.43 [('mitochondrial inner membrane', '2.96e-05')]	0.57 [('metalloendopeptidase activity', '1.50e-07'), ('zinc ion binding', '2.50e-02')]
440.12.30	Nop56p/Nop1p complex	FBRL (P15646), NOP58 (Q12499), SIK1 (Q12460)	3	FBRL (P22087), NOL5 (Q9Y2X3), NOL5A (O00567), k1c9 (P35527), k22e (P35908), k2c1 (P04264), rbp56 (Q92804)	7	4	0.43 [('rRNA processing', '1.31e-05')]	0.43 [('BOX C/D SNORNP COMPLEX', '1.82e-09')]	0.86 [('protein binding', '1.46e-02')]
510.1	TFIIH	CCL1 (P37366), KIN28 (P06242), RAD25 (Q00578), RAD3 (P06839), SSL1 (Q04673), TFB1 (P32776), TFB2 (Q02939), TFB3 (Q03290), TFB4 (Q12004)	9	CCNH (P51946), CDK7 (P50613), ERCC2 (P18074), MAT1 (P51948), ccnc (P24863), cd2l2 (Q9UQ88), cdc2 (P06493)	7	3	0.57 [('RNA elongation from RNA polymerase II promoter', '6.16e-08'), ('TRANSCRIPTION INITIATION FROM RNA POLYMERASE II PROMOTER', '2.39e-07'), ('nucleotide-excision repair, DNA damage removal', '2.27e-09'), ('positive regulation of transcription from RNA polymerase II promoter', '7.95e-07')]	0.57 [('nucleoplasm', '1.35e-04')]	0.57 [('ATP binding', '2.25e-02')]
450	Serine/threonine phoshpoprotein phosphatase	GAC1 (P28006), GIP2 (P40036), GLC8 (P41818), HEX2 (Q00816), PP12 (P32598), SDS22 (P36047)	6	PP1A (P62136), PP1B (P62140), PP1G (P36873), lrc40 (Q9H9A6), pp1r7 (Q15435), q07161 (Q07161)	6	3	0.5 [('GLYCOGEN METABOLIC PROCESS', '2.20e-07'), ('cell cycle', '6.07e-04'), ('cell division', '7.10e-04')]	0.5 [('MLL5-L complex', '2.12e-08')]	0.67 [('iron ion binding', '4.92e-07')]
260.7	Vps4p ATPase complex (Vps protein complex)	SNF7 (P39929), VPS24 (P36095), VPS4 (P52917)	3	CHM4A (Q9BY43), CHM4B (Q9H444), CHM4C (Q96CF2), CHMP3 (Q9Y3E7), CHMP5 (Q9NZZ3), CHMP6 (Q96FZ7), chmp7 (Q8WUX9), katl1 (Q9BW62), ktna1 (O75449), vps4a (Q9UN37), vps4b (O75351)	11	5	0.82 [('PROTEIN TRANSPORT', '1.37e-13')]	0.45 [('cytosol', '2.49e-03'), ('endosome', '2.06e-07')]	0.36 []
180.1	Farnesyltransferase (FTase)	FNTA (P29703), FNTB (P22007)	2	FNTA (P49354), FNTB (P49356), pgta (Q92696), pgtb1 (P53609), pgtb2 (P53611)	5	3	0.4 [('PROTEIN AMINO ACID FARNESYLATION', '8.05e-07'), ('protein amino acid geranylgeranylation', '2.41e-06'), ('visual perception', '5.26e-03')]	0.4 [('microtubule associated complex', '4.76e-04')]	0.8 [('zinc ion binding', '4.34e-03')]
230.20.20/510.190.10.20.10	SAGA complex	ADA2 (Q02336), GCN5 (Q03330), HFI1 (Q12060), NGG1 (P32494), SGF29 (P25554), SGF73 (P53165), SPT20 (P50875), SPT3 (P06844), SPT7 (P35177), SPT8 (P38915), TAF10 (Q12030), TAF12 (Q03761), TAF5 (P38129), TAF6 (P53040), TAF9 (Q05027), TRA1 (P38811)	16	GCNL2 (Q92830), GCNL2 (Q92830-2), SUPT3 (O75486), TAF10 (Q12962), TAF12 (Q16514), TAF12 (Q16514-2), TAF5 (Q15542), TAF5L (O75529), TAF6 (P49848), TAF9 (Q16594), TAF9B (Q9HBM6), TRRAP (Q9Y4A5), baz1a (Q9NRL2), bptf (Q12830), cecr2 (Q9BXF3), frap (P42345), pcaf (Q92831), q9bvj0 (Q9BVJ0), tad2a (O75478)	19	7	0.47 [('histone H3 acetylation', '8.80e-16'), ('regulation of transcription', '5.05e-08')]	0.63 [('transcription factor TFTC complex', '8.80e-16')]	0.47 [('transcription coactivator activity', '8.45e-12')]
180.2	Geranylgeranyltransferase I (GGTase I)	FNTA (P29703), PGTB1 (P18898)	2	FNTA (P49354), pgta (Q92696), pgtb1 (P53609), pgtb2 (P53611)	4	3	0.5 [('PROTEIN AMINO ACID GERANYLGERANYLATION', '1.74e-06'), ('visual perception', '3.81e-03')]	0.25 [('CAAX-PROTEIN GERANYLGERANYLTRANSFERASE COMPLEX', '2.15e-03')]	0.75 []
400	RSC complex (Remodel the structure of chromatin)	ARP7 (Q12406), ARP9 (Q05123), RSC1 (P53236), RSC2 (Q06488), RSC4 (Q02206), RSC6 (P25632), RSC8 (P43609), SAS5 (Q99314), SFH1 (Q06168), STH1 (P32597)	10	SMCA2 (P51531), SMCA4 (P51532), SMRC1 (Q92922), SMRC2 (Q8TAQ2), SMRD3 (Q6STE5), SMRD3 (Q6STE5-2), SNF5 (Q12824), SNF5 (Q12824-2), actb (P60709), actg (P63261), actk (Q9BYX7), acty (P42025), pb1 (Q86U86), q58ey4 (Q58EY4), q59g16 (Q59G16), q9h836 (Q9H836)	16	8	0.56 [('transcription', '1.85e-05')]	0.5 [('SWI/SNF complex', '6.60e-16')]	0.44 [('DNA binding', '4.20e-05')]
100	Calcineurin B	CANB (P25296), PP2B1 (P23287), PP2B2 (P14747)	3	CANB1 (P63098), PP2BA (Q08209), PP2BB (P16298), canb2 (Q96LZ3), chp1 (Q99653), chp2 (O43745), hpcl4 (Q9UM19), ncs1 (P62166), pp2bc (P48454)	9	6	0.22 [('activation of pro-apoptotic gene products', '6.04e-04')]	0.33 [('CALCINEURIN COMPLEX', '1.09e-09')]	0.89 [('calcium ion binding', '2.91e-09')]
510.190.10.20.20	SAGA-like complex (SLIK)	ADA2 (Q02336), SPT3 (P06844), SPT7 (P35177), TAF6 (P53040), TRA1 (P38811)	5	SUPT3 (O75486), TAF6 (P49848), TRRAP (Q9Y4A5), baz1a (Q9NRL2), frap (P42345), q9bvj0 (Q9BVJ0), tad2a (O75478)	7	4	0.57 [('regulation of transcription', '2.92e-04')]	0.43 [('transcription factor TFTC complex', '3.39e-07')]	0.43 [('DNA BINDING', '2.19e-02')]
20	2-oxoglutarate dehydrogenase	DLDH (P09624), ODO1 (P20967), ODO2 (P19262)	3	ODO1 (Q02218), ODP2 (P10515), ODPX (O00330), gshr (P00390), odb2 (P11182), odo2 (P36957), q86tq8 (Q86TQ8)	7	4	0.29 [('glycolysis', '8.31e-04'), ('tricarboxylic acid cycle', '3.88e-04')]	0.43 [('mitochondrial matrix', '9.00e-05')]	0.71 [('lipoic acid binding', '1.10e-15')]
510.190.50	SWI/SNF transcription activator complex	ARP7 (Q12406), ARP9 (Q05123), SNF11 (P38956), SNF12 (P53628), SNF2 (P22082), SNF5 (P18480), SNF6 (P18888), SWI1 (P09547), SWI3 (P32591), TAF14 (P35189)	10	ACTB (P60709), ACTG (P63261), SMCA2 (P51531), SMCA4 (P51532), SMRC1 (Q92922), SMRC2 (Q8TAQ2), actk (Q9BYX7), acty (P42025), mll2 (O14686), q58ey4 (Q58EY4), q59g16 (Q59G16), q9h836 (Q9H836), snf5 (Q12824-2)	13	7	0.46 [('TRANSCRIPTION', '3.80e-03'), ('chromatin remodeling', '2.82e-12')]	0.38 [('SWI/SNF COMPLEX', '5.52e-11')]	0.54 [('DNA binding', '9.78e-06')]
445.1	SCF-CDC4 complex	CDC4 (P07834), CDC53 (Q12018), SGT1 (Q08446), SKP1 (P52286), UBC3 (P14682)	5	CUL1 (Q13616), CUL2 (Q13617), SKP1 (P63208), fbw1b (Q9UKB1-3), fbxw7 (Q969H0), sugt1 (Q9Y2Z0)	6	3	0.5 [('modification-dependent protein catabolic process', '1.20e-03'), ('ubiquitin-dependent protein catabolic process', '4.87e-05')]	0.33 [('ubiquitin ligase complex', '1.06e-03')]	0.5 []
440.30.10	mRNA splicing	AAR2 (P32357), BRR1 (Q99177), BRR2 (P32639), CWC15 (Q03772), CWC2 (Q12046), CWC22 (P53333), CWC23 (P52868), DHR2 (P36009), LSM4 (P40070), MAK5 (P38112), MUD2 (P36084), NCBP1 (P34160), NCBP2 (Q08920), PRP16 (P15938), PRP17 (P40968), PRP18 (P33411), PRP2 (P20095), PRP22 (P24384), PRP24 (P49960), PRP28 (P23394), PRP31 (P49704), PRP38 (Q00723), PRP39 (P39682), PRP4 (P20053), PRP40 (P33203), PRP43 (P5…	37	PR40A (O75400), PRP4 (O43172), PRP6 (O94906), PRP8 (Q6P2Q9), RU17 (P08621), RUXE (P62304), SMD1 (P62314), SMD3 (P62318), U520 (O75643), gbb1 (P62873), gbb2 (P62879), gbb4 (Q9HAV0), helc1 (Q8N3C0), nol5 (Q9Y2X3)	14	5	0.21 [('NUCLEAR MRNA SPLICING, VIA SPLICEOSOME', '1.60e-03'), ('hormone-mediated signaling', '6.05e-05'), ('spliceosomal snRNP assembly', '1.89e-05'), ('spliceosome assembly', '6.37e-06')]	0.57 [('SPLICEOSOMAL COMPLEX', '1.72e-12')]	0.5 []
265	Kel1p/Kel2p complex	KEL1 (P38853), KEL2 (P50090)	2	HCFC1 (P51610), hcfc2 (Q9Y5Z7), lztr1 (Q8N653), rabek (Q7Z6M1)	4	3	0.25 [('reactivation of latent virus', '1.51e-02'), ('regulation of protein complex assembly', '1.00e-02')]	0.5 []	0.5 [('transcription coactivator activity', '1.77e-02')]
230.20.10/510.190.10.10	ADA complex	ADA2 (Q02336), GCN5 (Q03330), HFI1 (Q12060), NGG1 (P32494), SPT20 (P50875), TRA1 (P38811)	6	GCNL2 (Q92830), GCNL2 (Q92830-2), TRRAP (Q9Y4A5), bptf (Q12830), cecr2 (Q9BXF3), frap (P42345), pcaf (Q92831), q9bvj0 (Q9BVJ0), tad2a (O75478)	9	6	0.44 [('chromatin remodeling', '6.35e-08')]	0.33 [('PCAF complex', '1.02e-07'), ('STAGA complex', '8.30e-07'), ('transcription factor TFTC complex', '1.62e-06')]	0.33 [('TRANSCRIPTION COACTIVATOR ACTIVITY', '1.97e-03'), ('histone acetyltransferase activity', '3.30e-06'), ('histone deacetylase binding', '3.30e-06')]
